# Supplementary material for: 1-(Piperidin-3-yl)thymine amides as inhibitors of M. tuberculosis thymidylate kinase
Source: PubMed Central journal article supplement (PMC6920704; doi:10.1080/14756366.2019.1662790), 2019-12-11

## Support information

### **1-(Piperidin-3-yl)thymine amides as inhibitors of *M. tuberculosis* thymidylate kinase**

**Yanlin Jian <sup>a</sup>, Martijn D. P. Risseuw <sup>a</sup>, Mathy Froeyen <sup>b</sup>, Lijun Song <sup>a</sup>, Davie Cappoen <sup>c</sup>, Paul Cos <sup>c</sup>, H el ene Munier-Lehmann <sup>d</sup> and Serge Van Calenbergh <sup>a,\*</sup>**

<sup>a</sup> Laboratory for Medicinal Chemistry, Faculty of Pharmaceutical Sciences, Ghent University, Ottergemsesteenweg 460, B-9000 Ghent, Belgium

<sup>b</sup> Department of Medicinal Chemistry, Rega Institute for Medical Research, KU Leuven, Herestraat 49, 3000 Leuven, Belgium

<sup>c</sup> Laboratory for Microbiology, Parasitology and Hygiene (LMPH), Department of Pharmaceutical Sciences, University of Antwerp, Campus Drie Eiken, Universiteitsplein 1, Belgium

<sup>d</sup> Unit of Chemistry and Biocatalysis, Department of Structural Biology and Chemistry, Institut Pasteur, CNRS UMR3523, 28 Rue du Dr. Roux, Cedex 15 75724 Paris, France

## Table of contents:

|                                                 |     |
|-------------------------------------------------|-----|
| <sup>1</sup> H-NMR spectrum compound <b>4a</b>  | S3  |
| <sup>13</sup> C-NMR spectrum compound <b>4a</b> | S4  |
| HSQC spectrum compound <b>4a</b>                | S5  |
| <sup>1</sup> H-NMR spectrum compound <b>4b</b>  | S6  |
| <sup>13</sup> C-NMR spectrum compound <b>4b</b> | S7  |
| HSQC spectrum compound <b>4b</b>                | S8  |
| <sup>1</sup> H-NMR spectrum compound <b>4c</b>  | S9  |
| <sup>13</sup> C-NMR spectrum compound <b>4c</b> | S9  |
| <sup>13</sup> C-NMR spectrum compound <b>4c</b> | S10 |
| HSQC spectrum compound <b>4c</b>                | S11 |
| <sup>1</sup> H-NMR spectrum compound <b>4d</b>  | S12 |
| <sup>13</sup> C-NMR spectrum compound <b>4d</b> | S13 |
| HSQC spectrum compound <b>4d</b>                | S14 |
| <sup>1</sup> H-NMR spectrum compound <b>4e</b>  | S15 |
| <sup>13</sup> C-NMR spectrum compound <b>4e</b> | S16 |
| HSQC spectrum compound <b>4e</b>                | S17 |
| <sup>1</sup> H-NMR spectrum compound <b>4f</b>  | S18 |
| <sup>13</sup> C-NMR spectrum compound <b>4f</b> | S19 |
| HSQC spectrum compound <b>4f</b>                | S20 |
| <sup>1</sup> H-NMR spectrum compound <b>4g</b>  | S21 |
| <sup>13</sup> C-NMR spectrum compound <b>4g</b> | S22 |
| HSQC spectrum compound <b>4g</b>                | S23 |
| <sup>1</sup> H-NMR spectrum compound <b>4h</b>  | S24 |
| <sup>13</sup> C-NMR spectrum compound <b>4h</b> | S25 |
| HSQC spectrum compound <b>4h</b>                | S26 |
| <sup>1</sup> H-NMR spectrum compound <b>4i</b>  | S27 |
| <sup>13</sup> C-NMR spectrum compound <b>4i</b> | S28 |
| HSQC spectrum compound <b>4i</b>                | S29 |
| <sup>1</sup> H-NMR spectrum compound <b>4j</b>  | S30 |
| <sup>13</sup> C-NMR spectrum compound <b>4j</b> | S31 |
| HSQC spectrum compound <b>4j</b>                | S32 |
| <sup>1</sup> H-NMR spectrum compound <b>4k</b>  | S33 |
| <sup>13</sup> C-NMR spectrum compound <b>4k</b> | S34 |
| HSQC spectrum compound <b>4k</b>                | S35 |

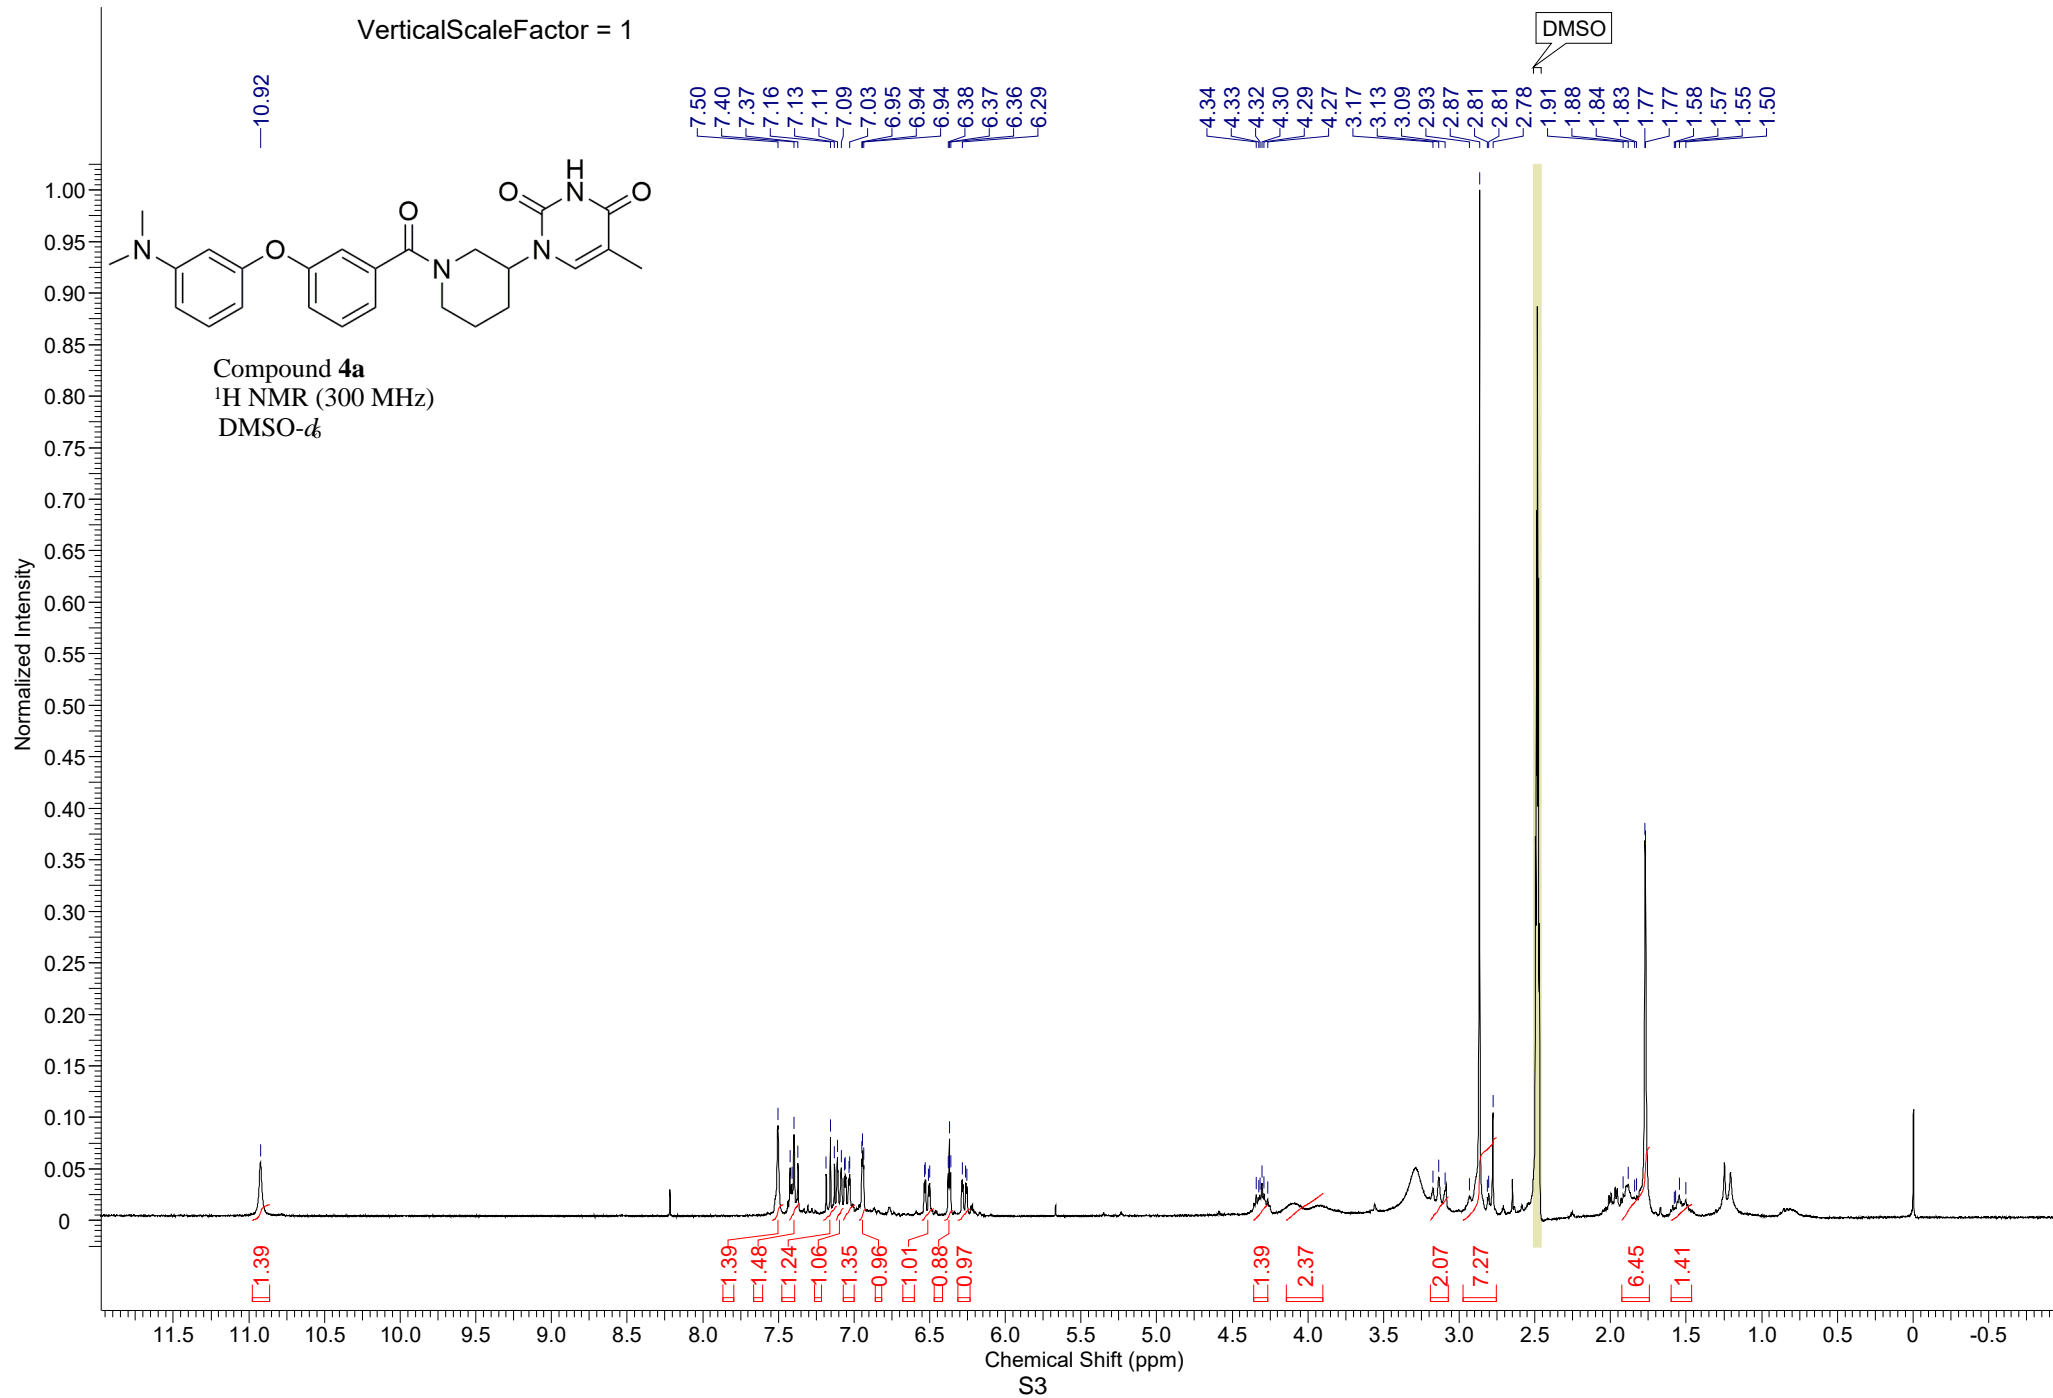

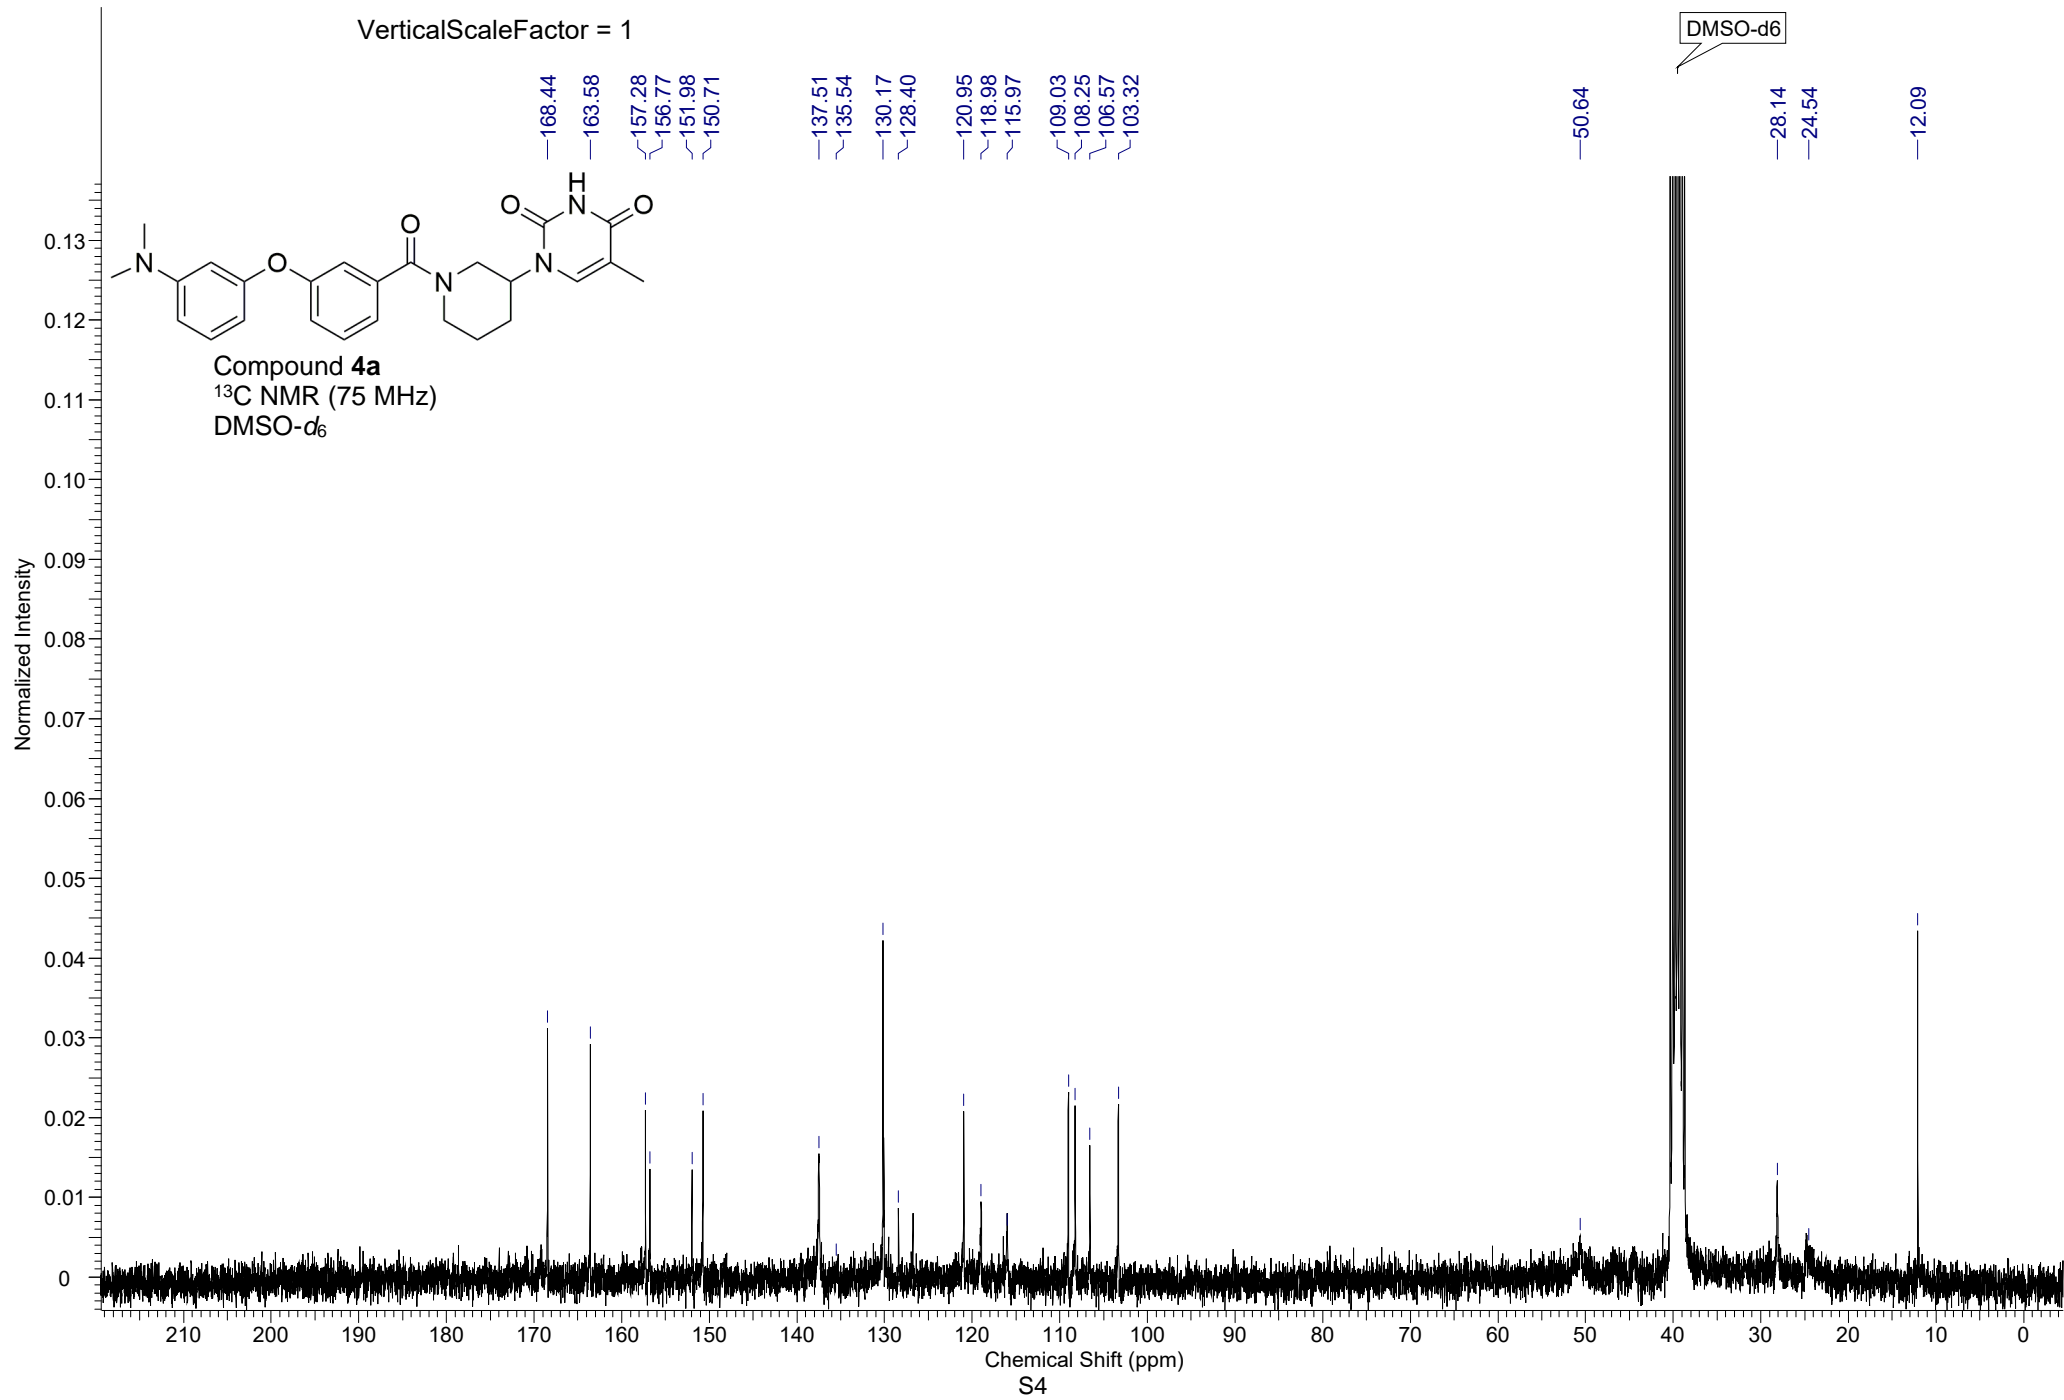

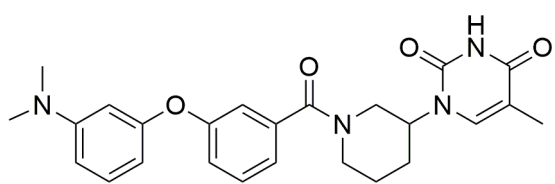

Compound **4a**  
HSQC  
DMSO-*d*<sub>6</sub>

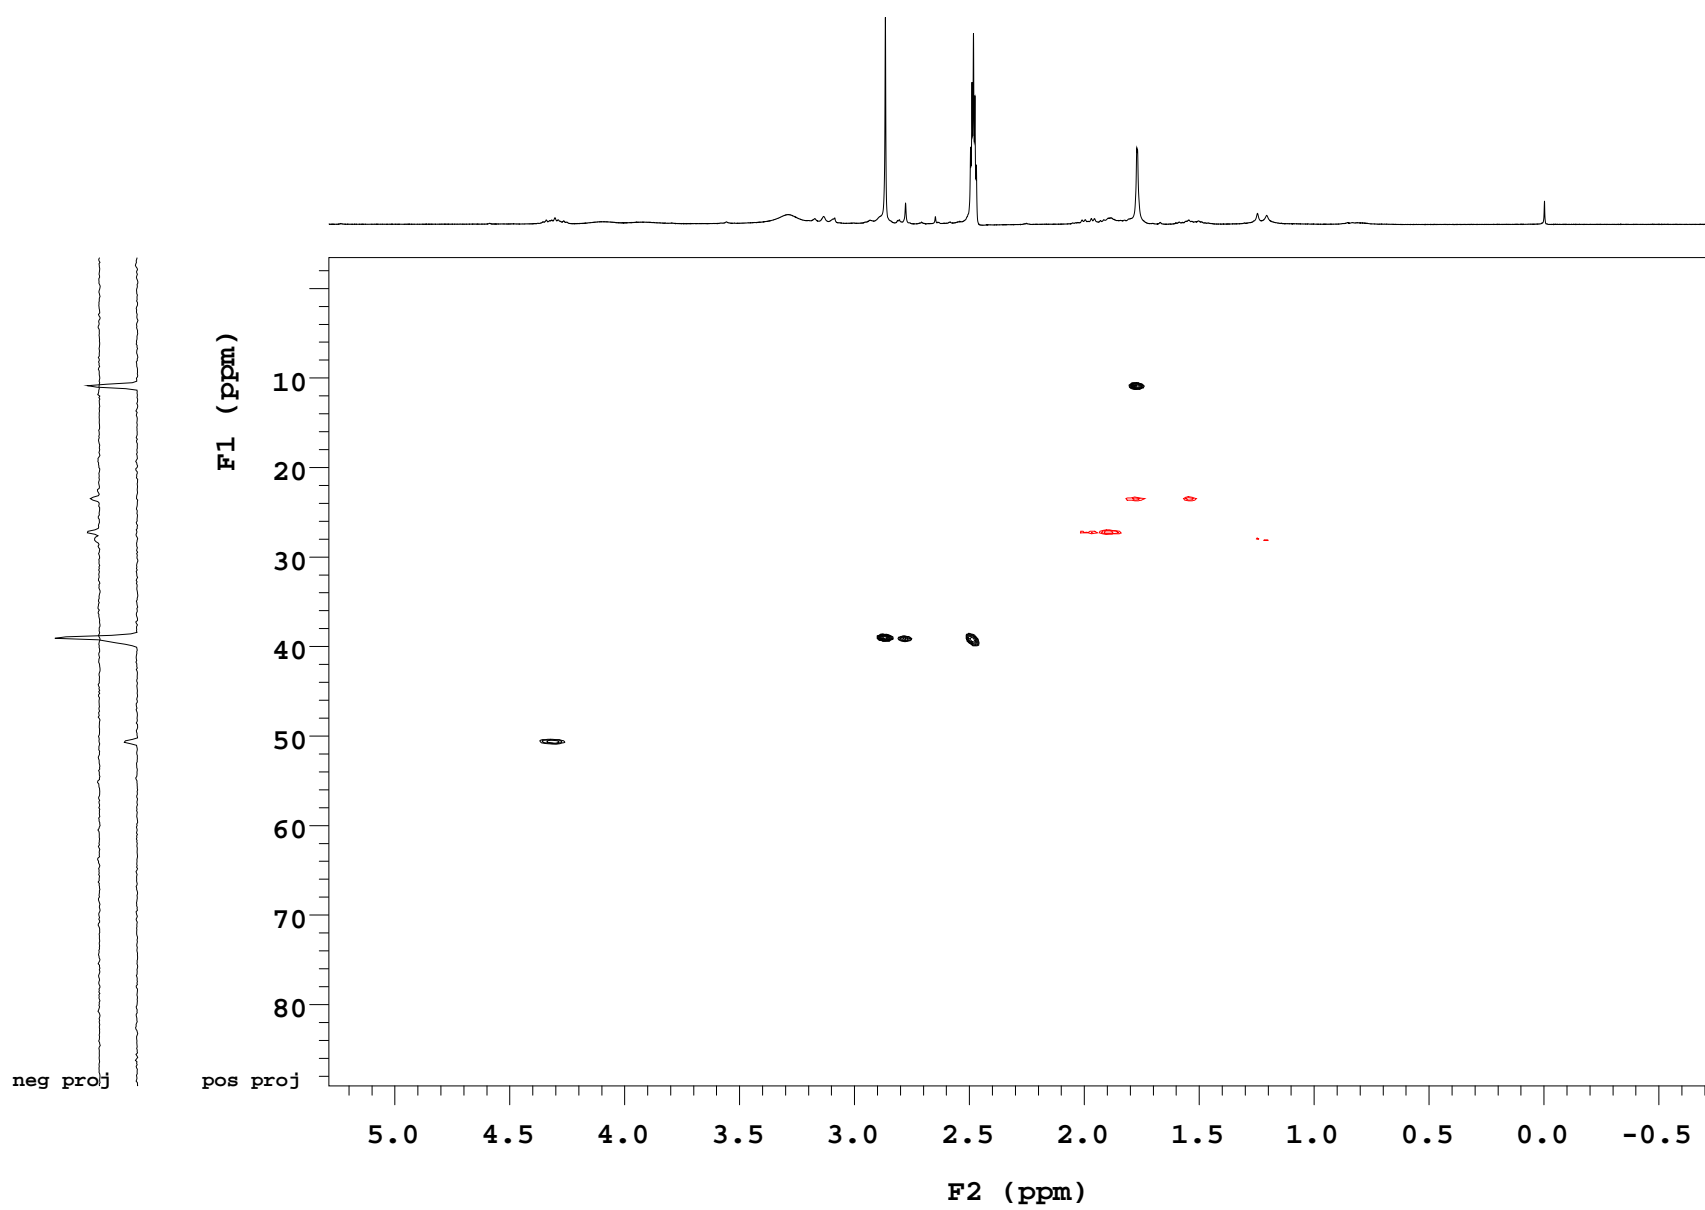

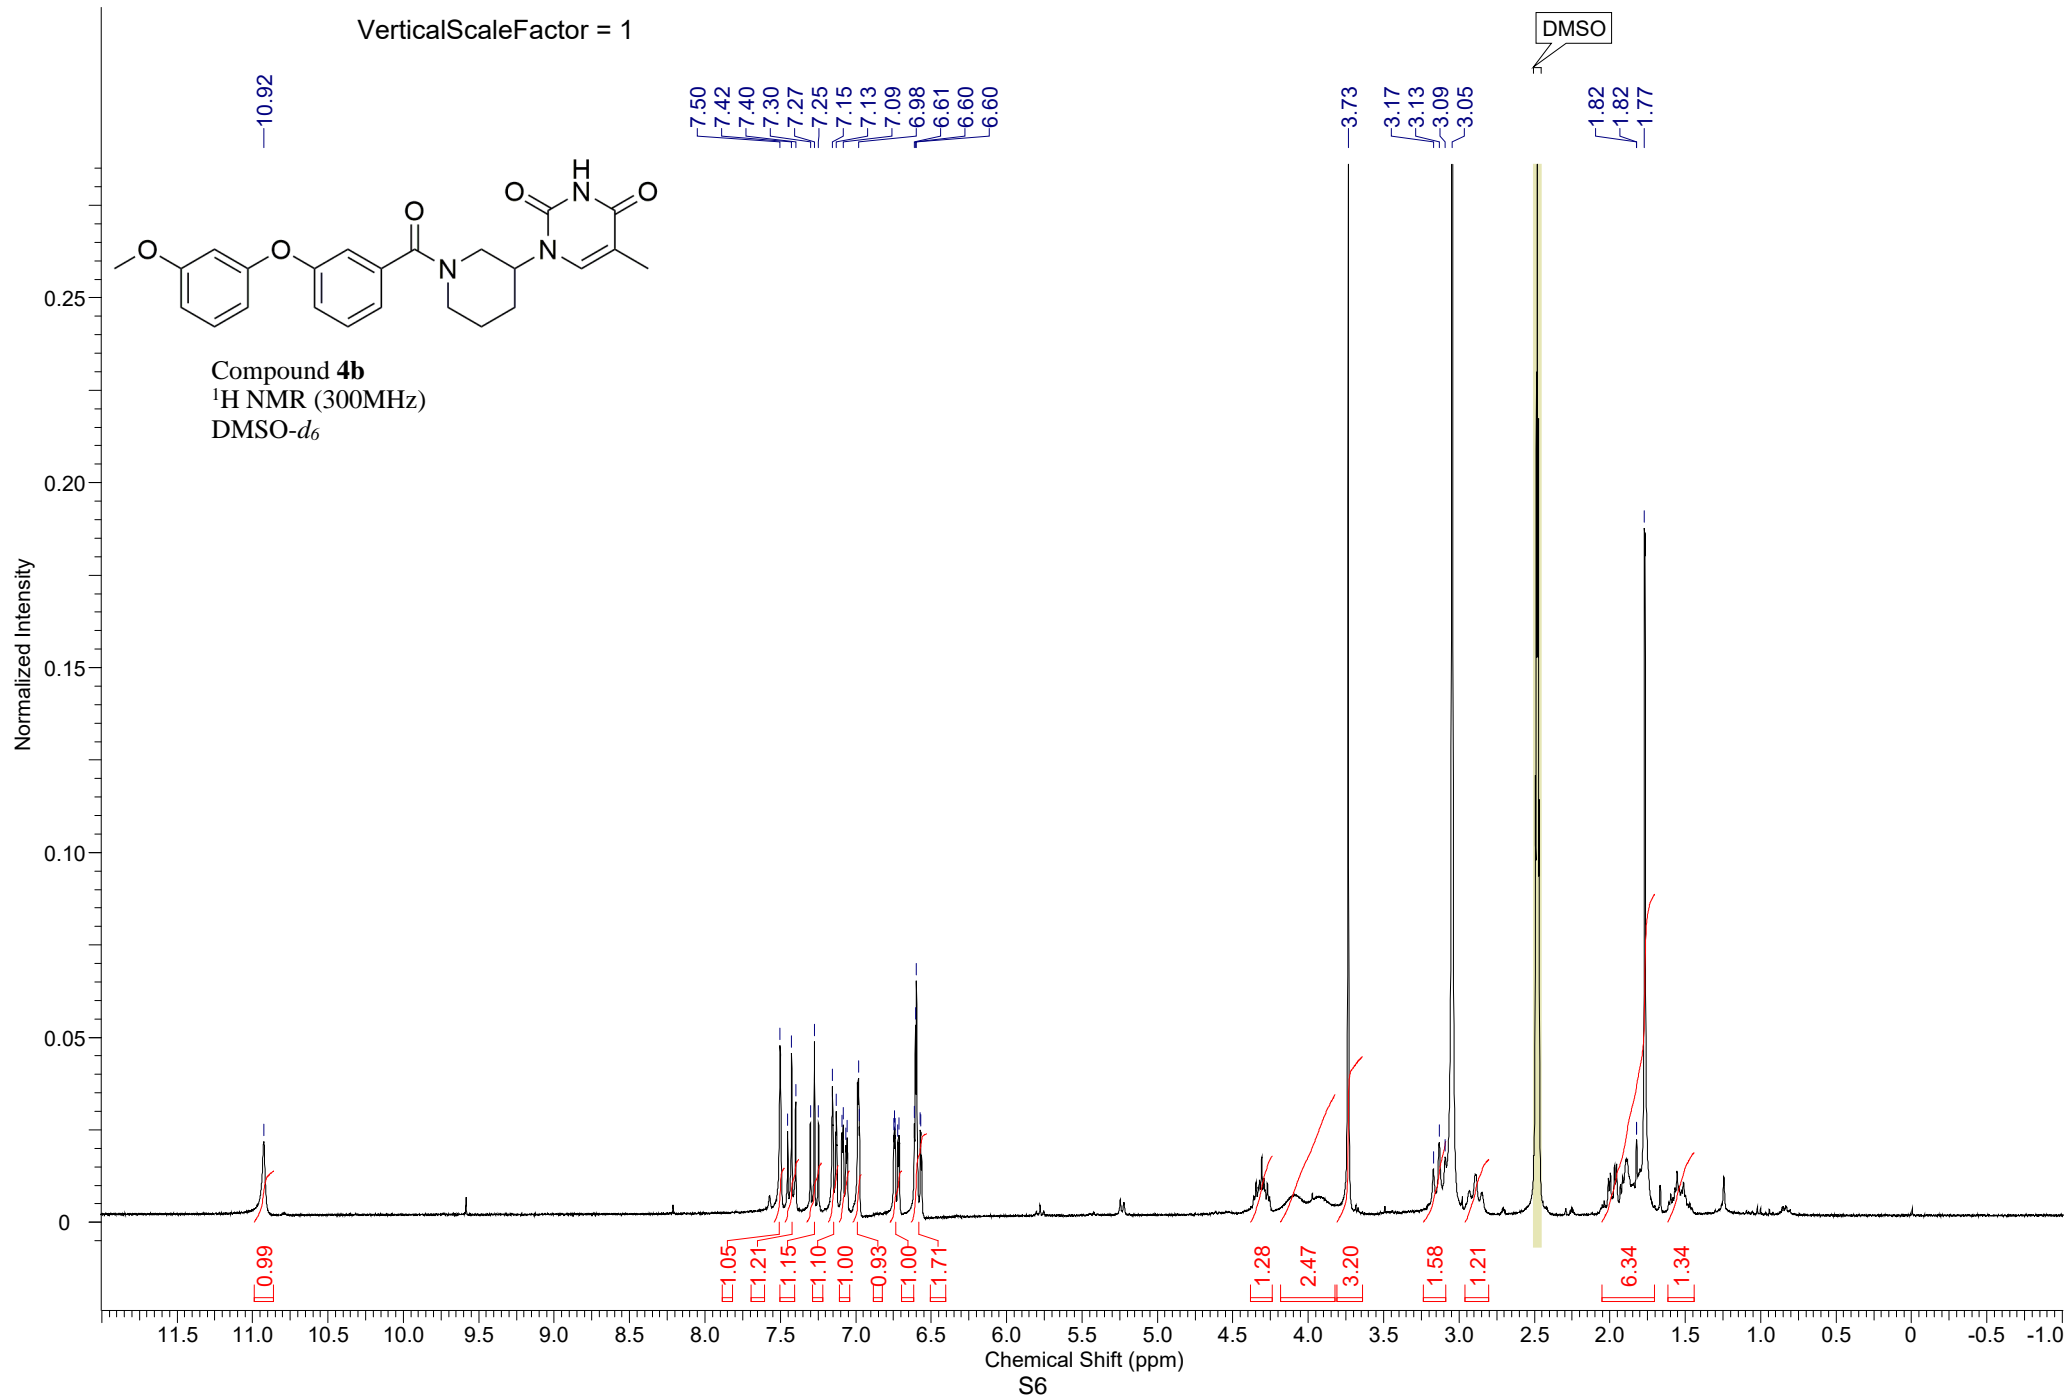

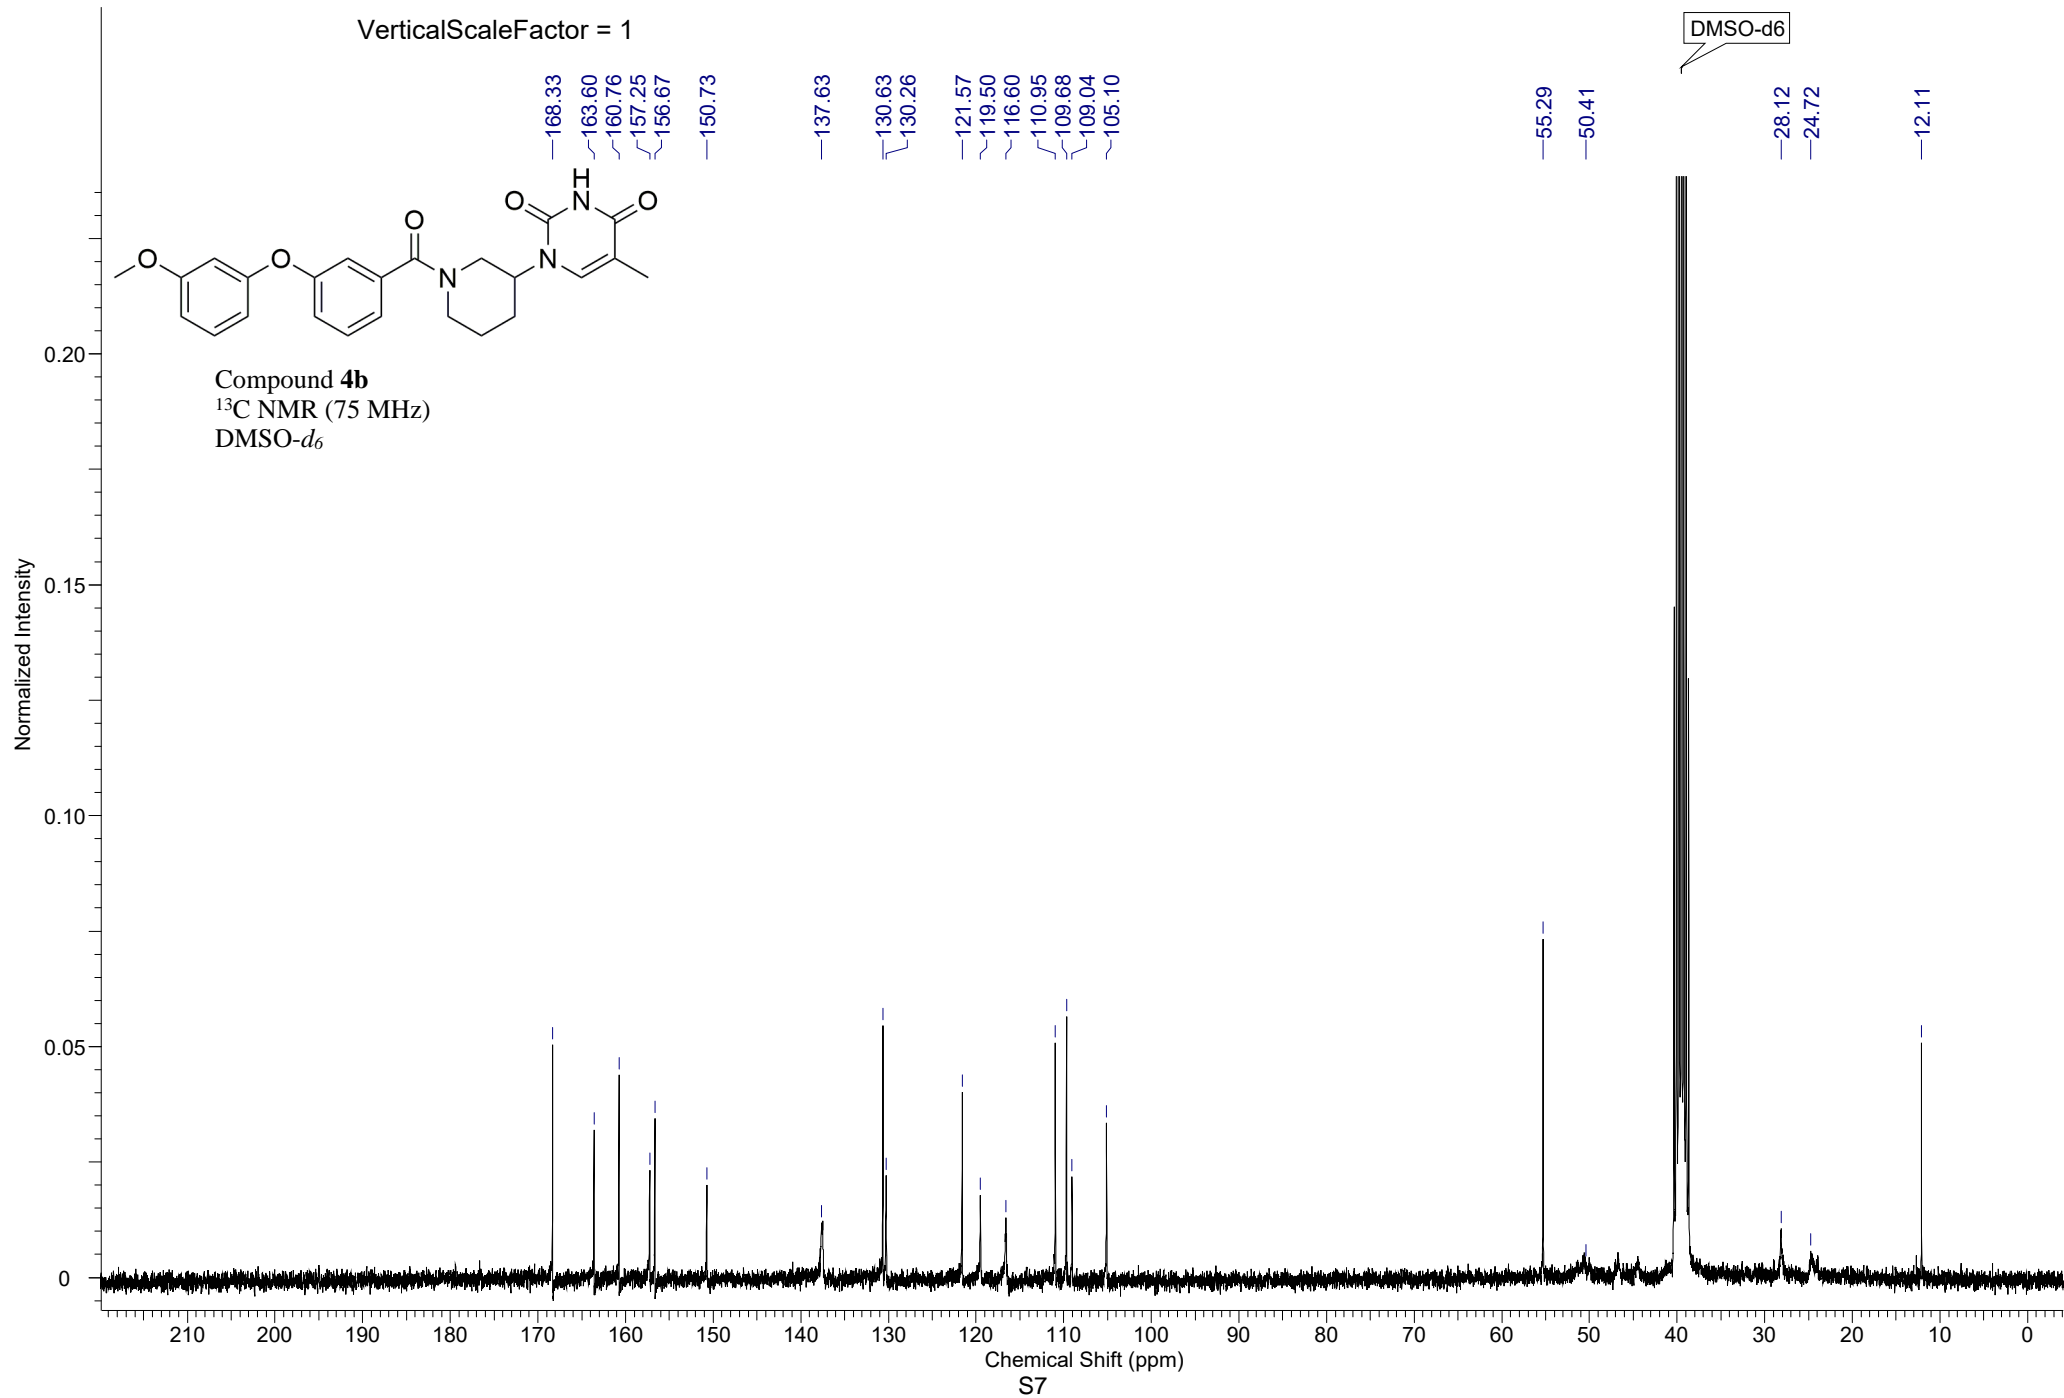

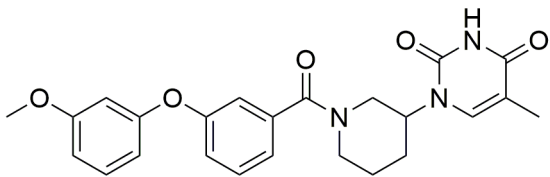

Compound **4b**  
HSQC  
DMSO-*d*<sub>6</sub>

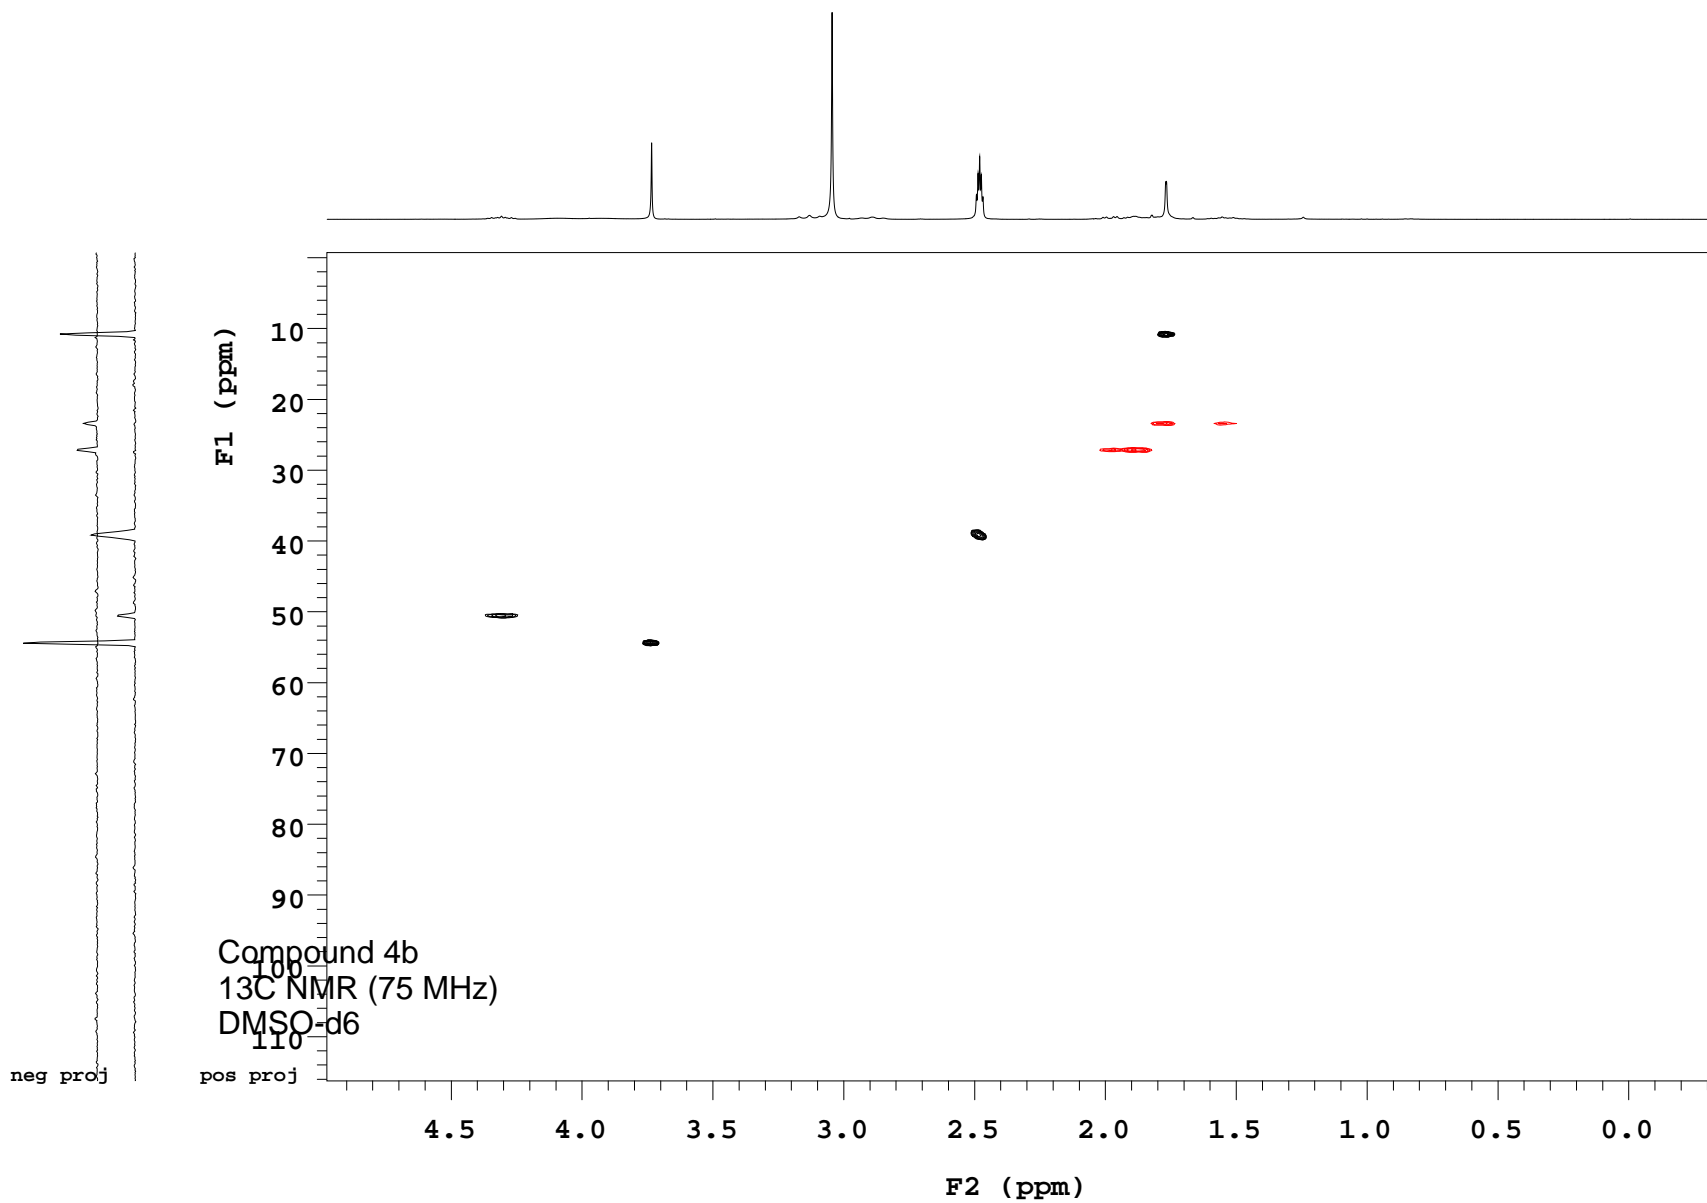

Compound 4b  
13C NMR (75 MHz)  
DMSO-*d*<sub>6</sub>



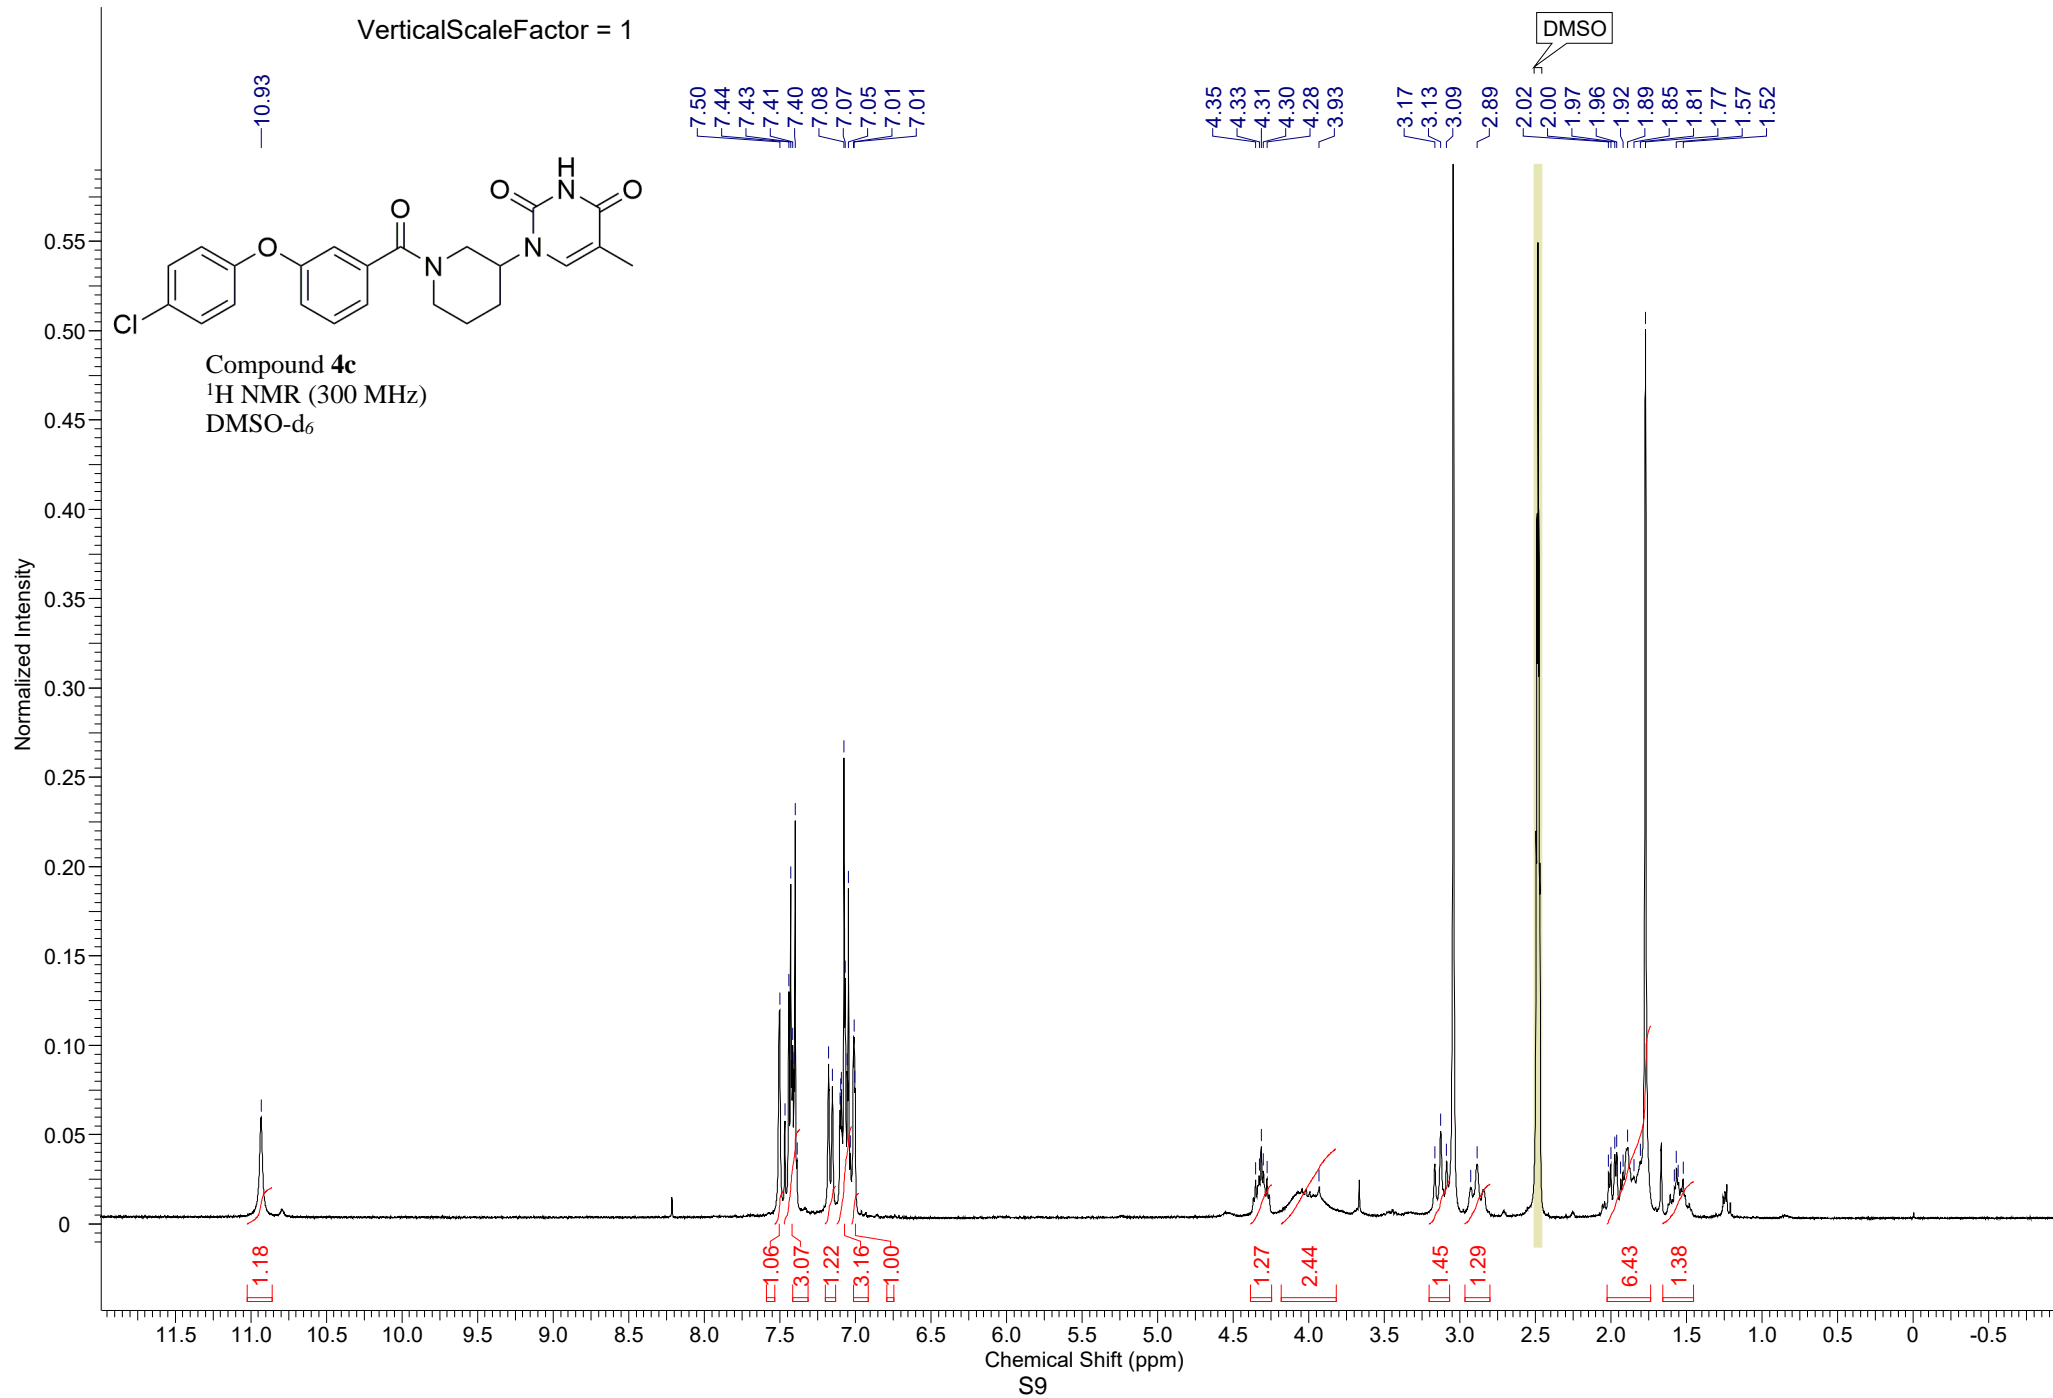

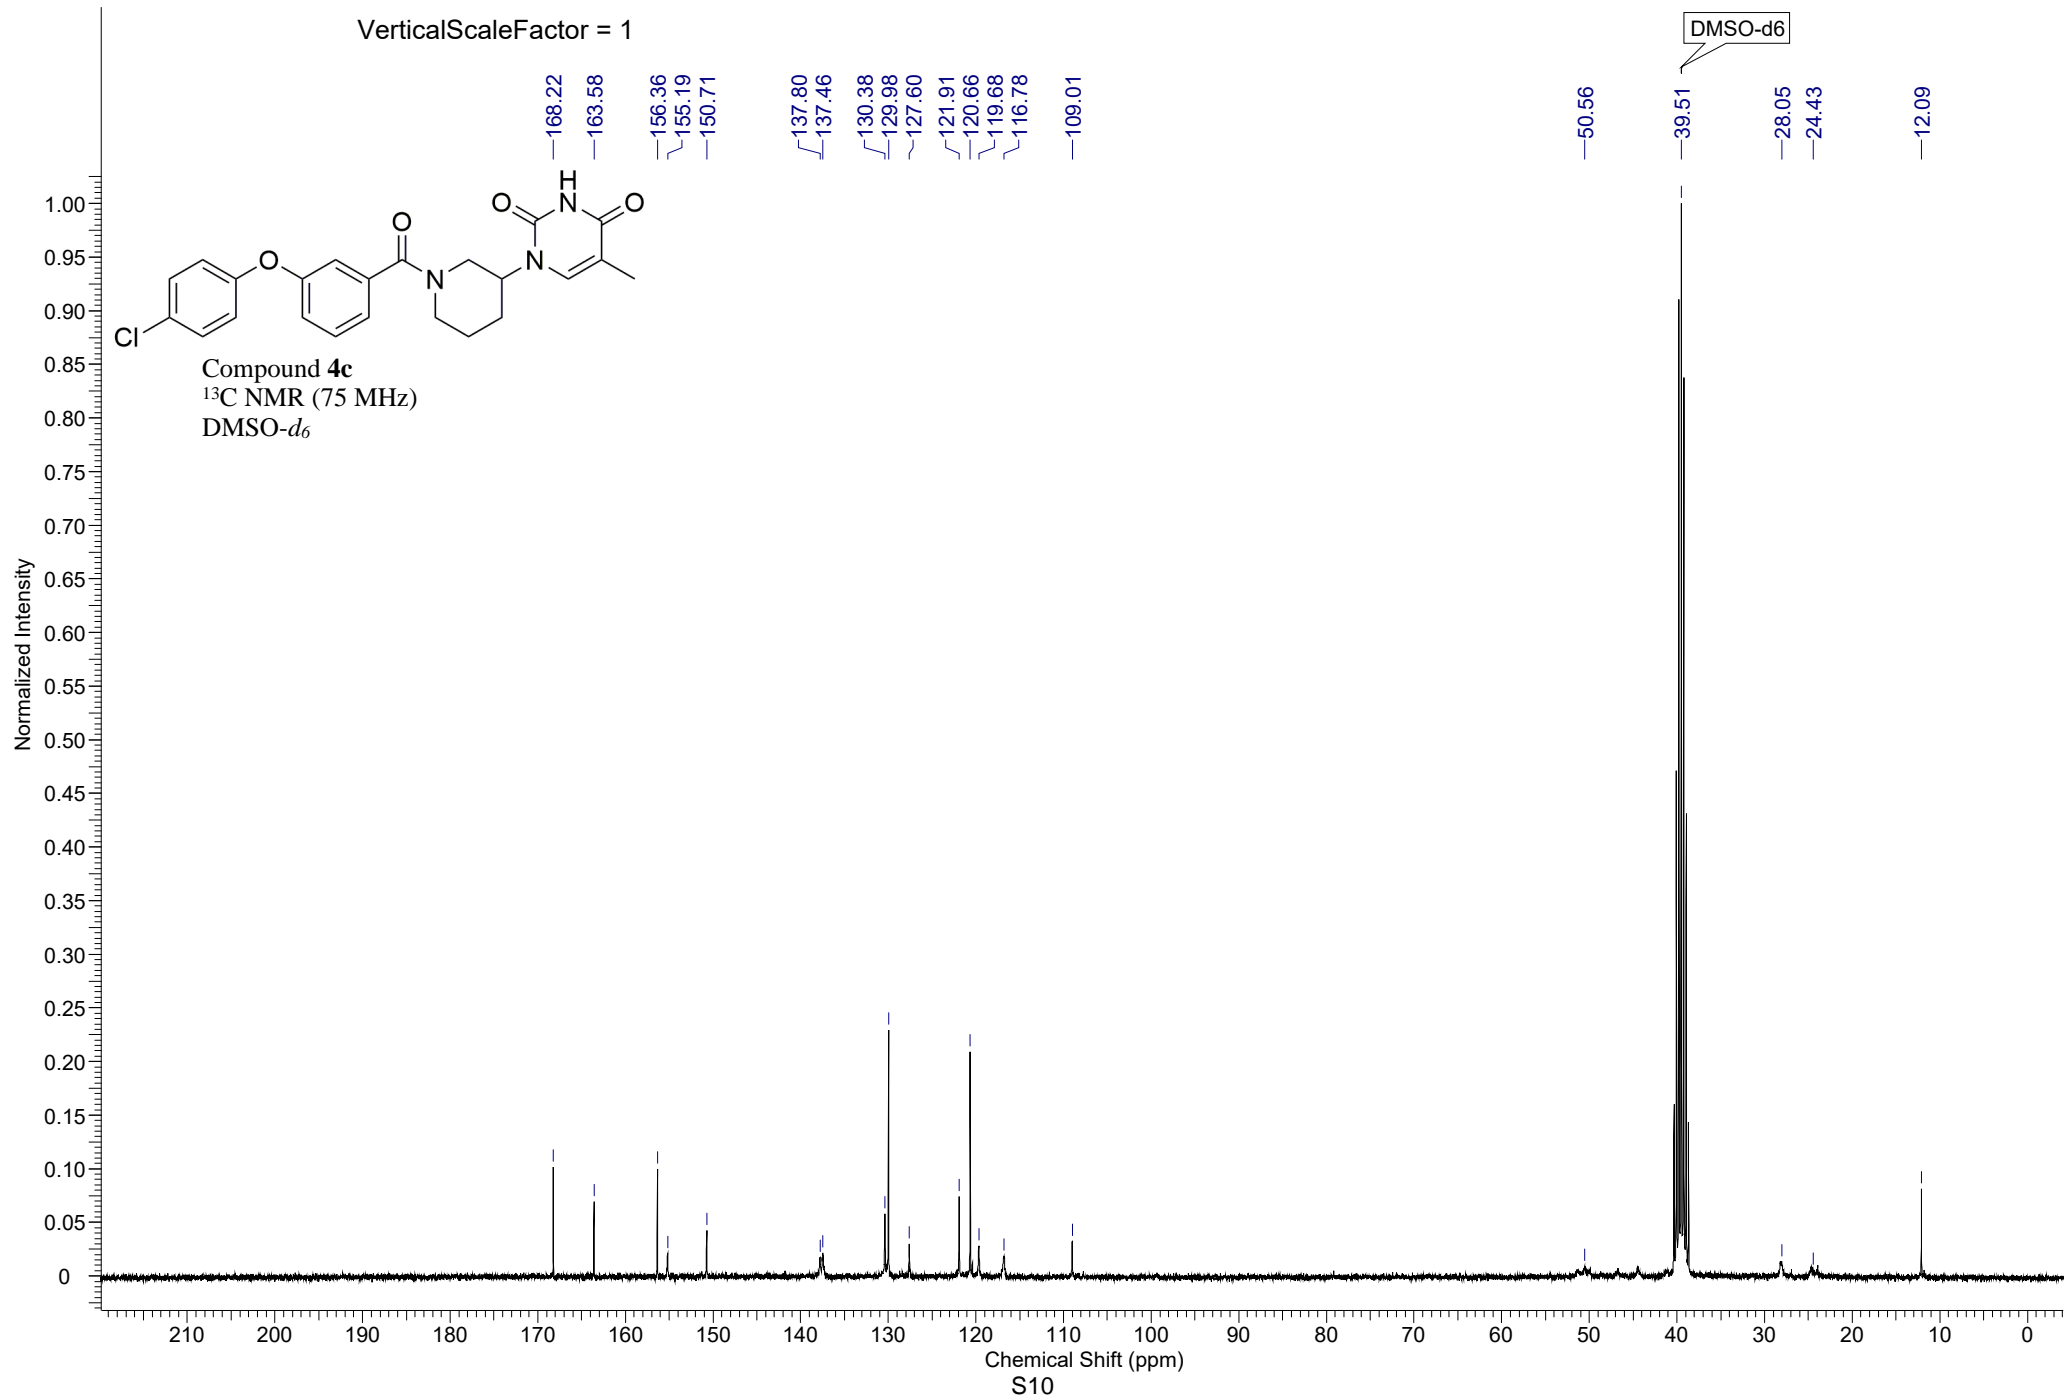

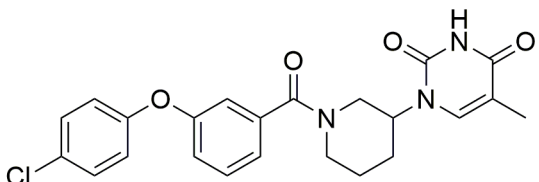

Compound **4c**  
HSQC  
DMSO-*d*<sub>6</sub>

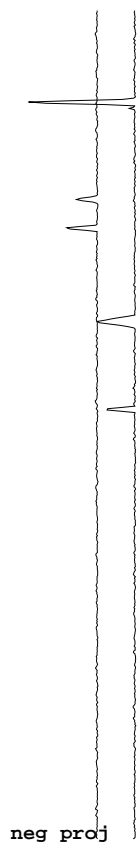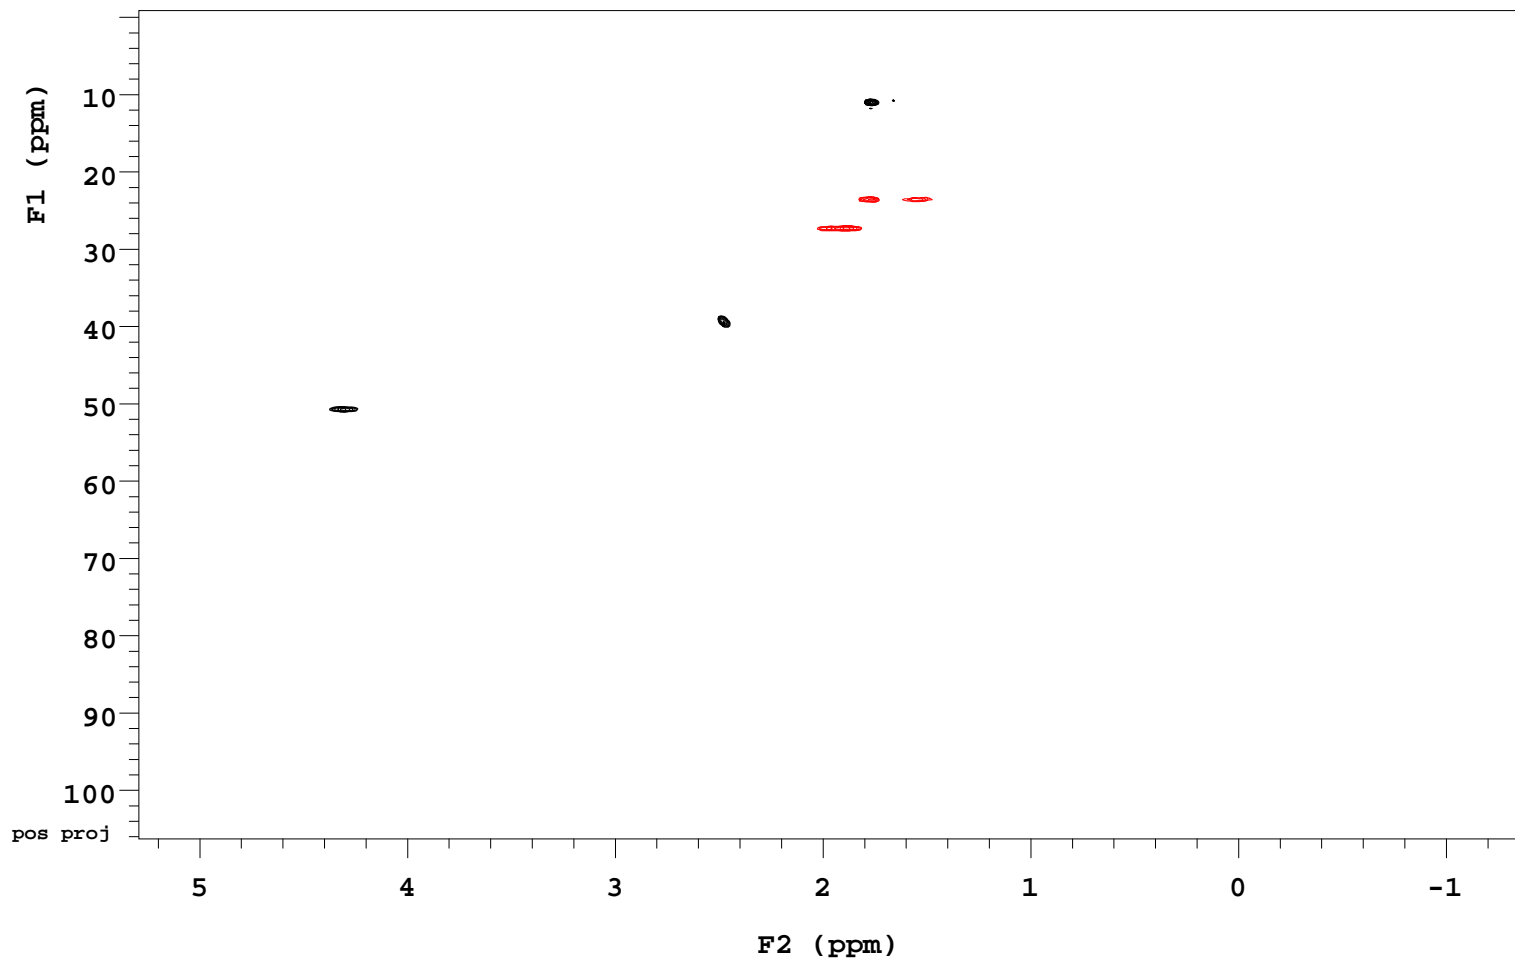

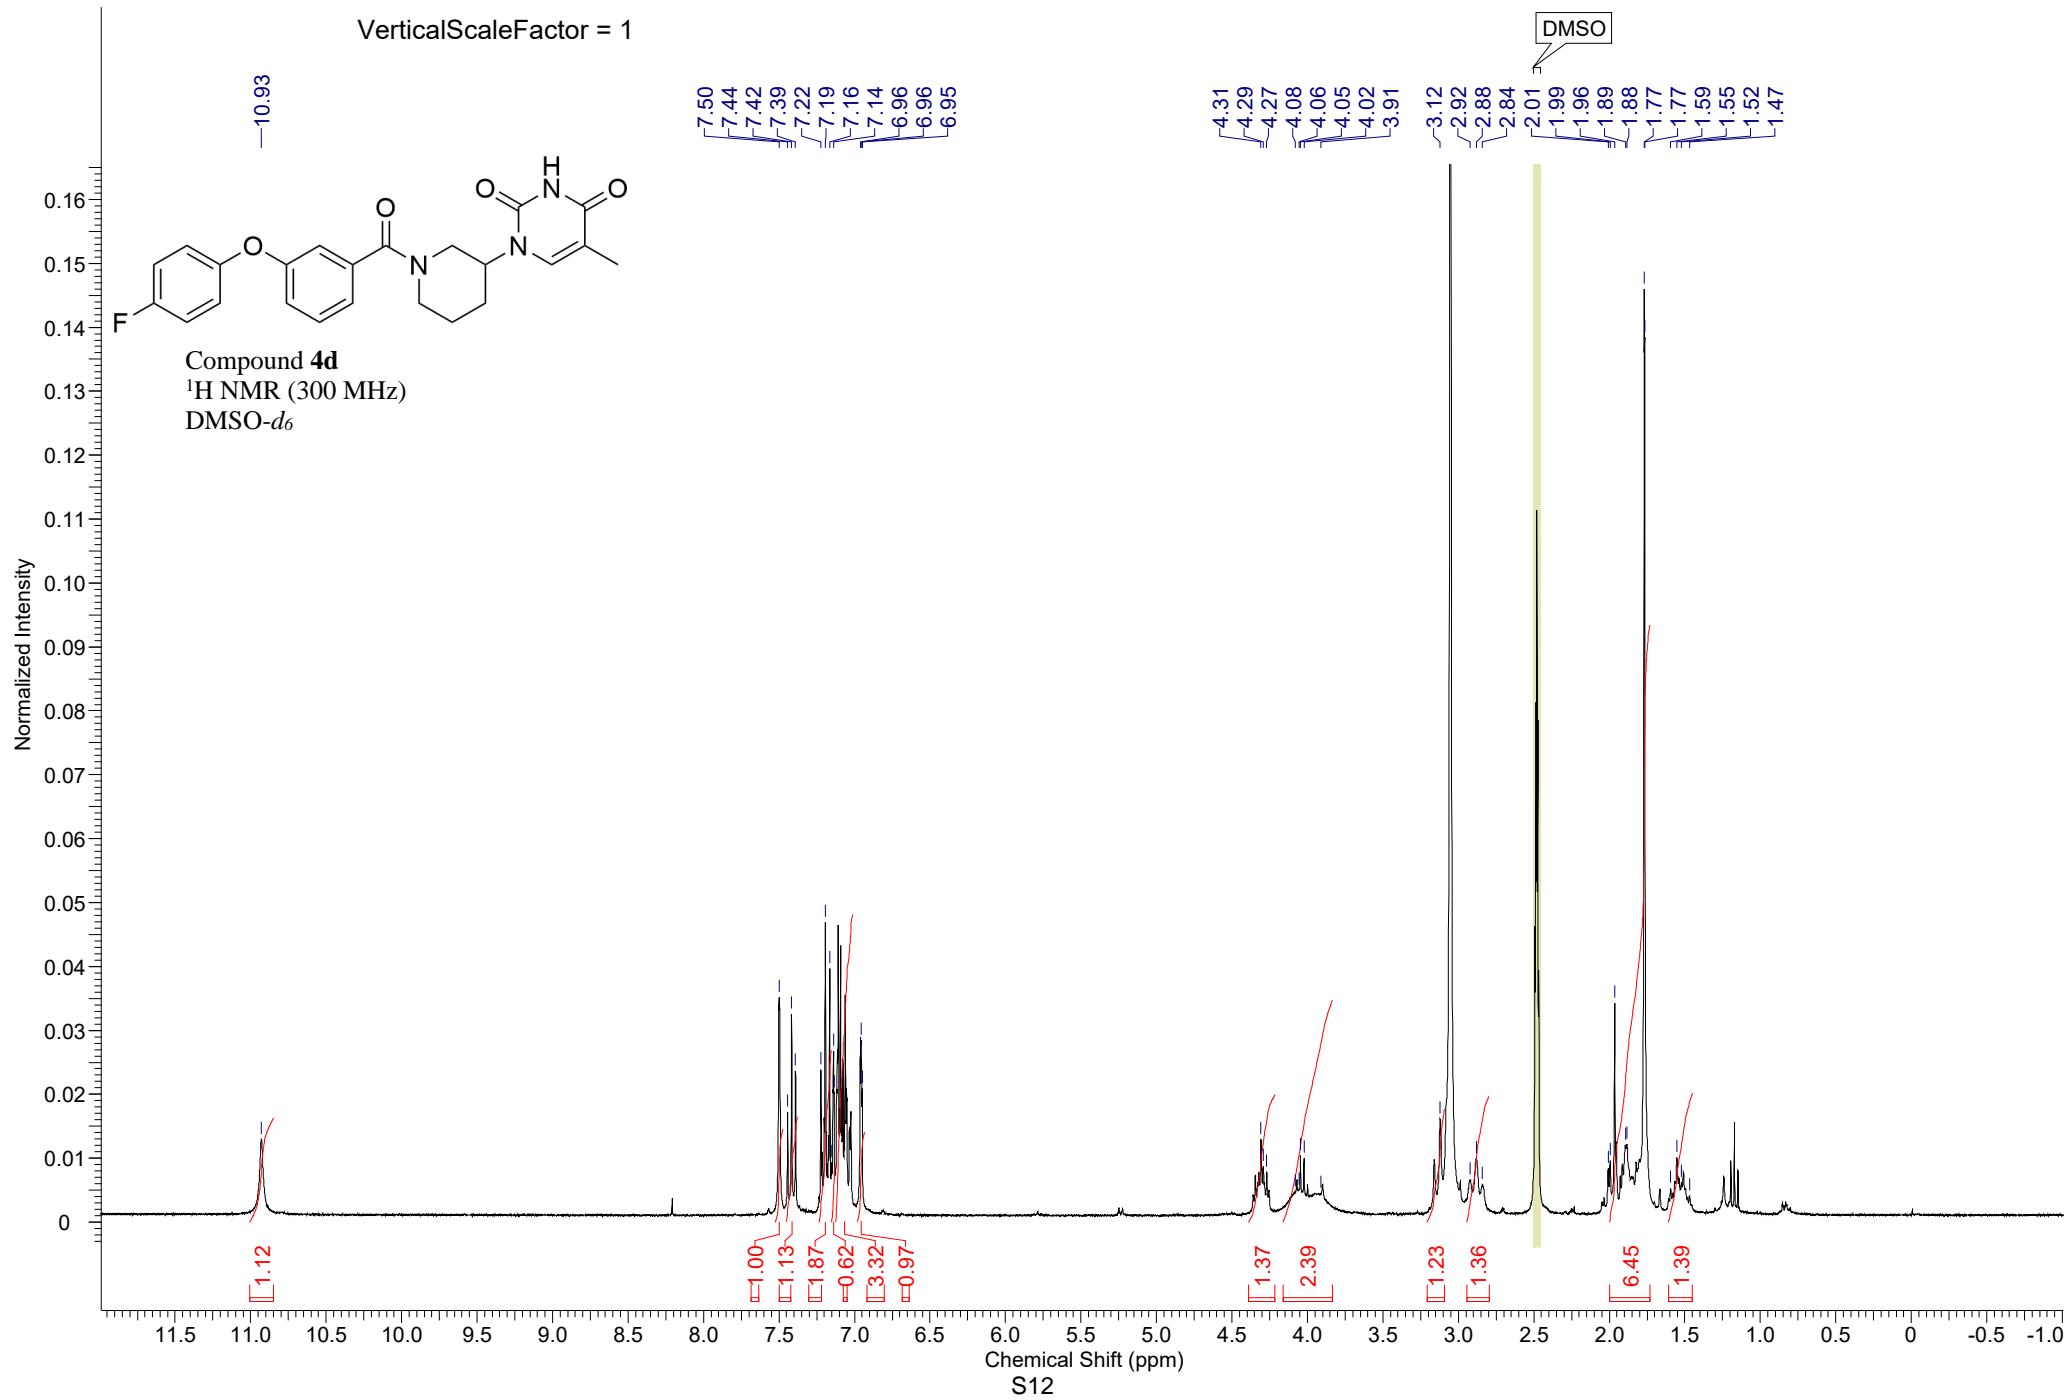

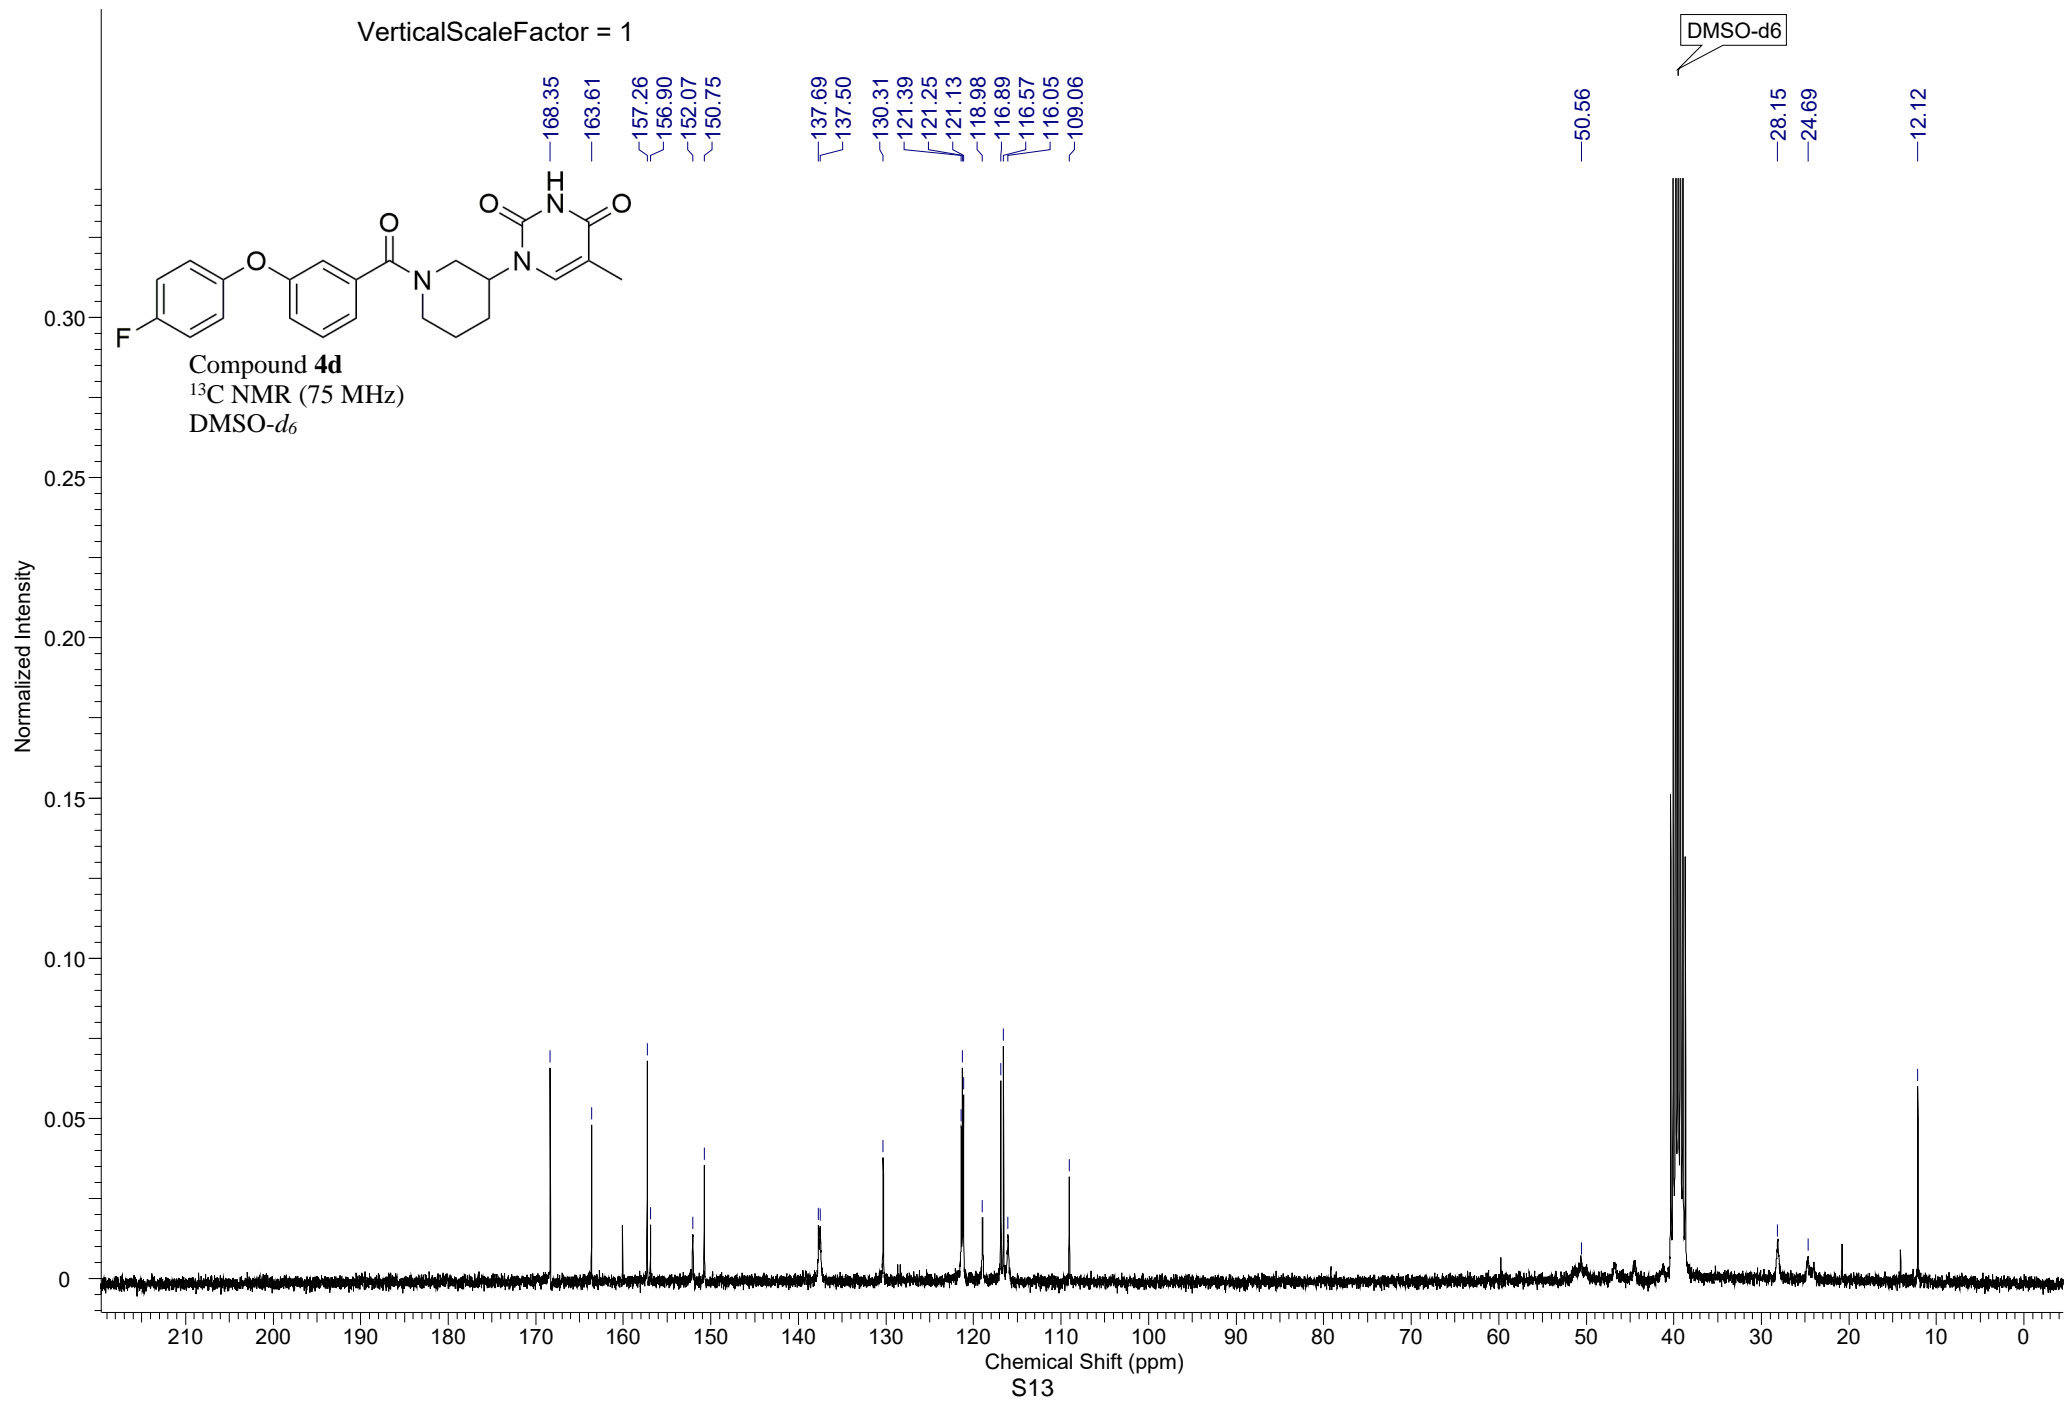

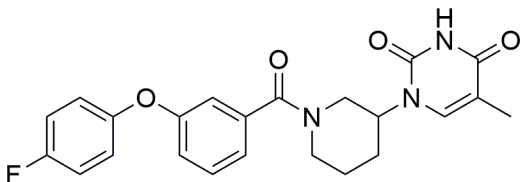

Compound **4d**  
HSQC  
DMSO-*d*<sub>6</sub>

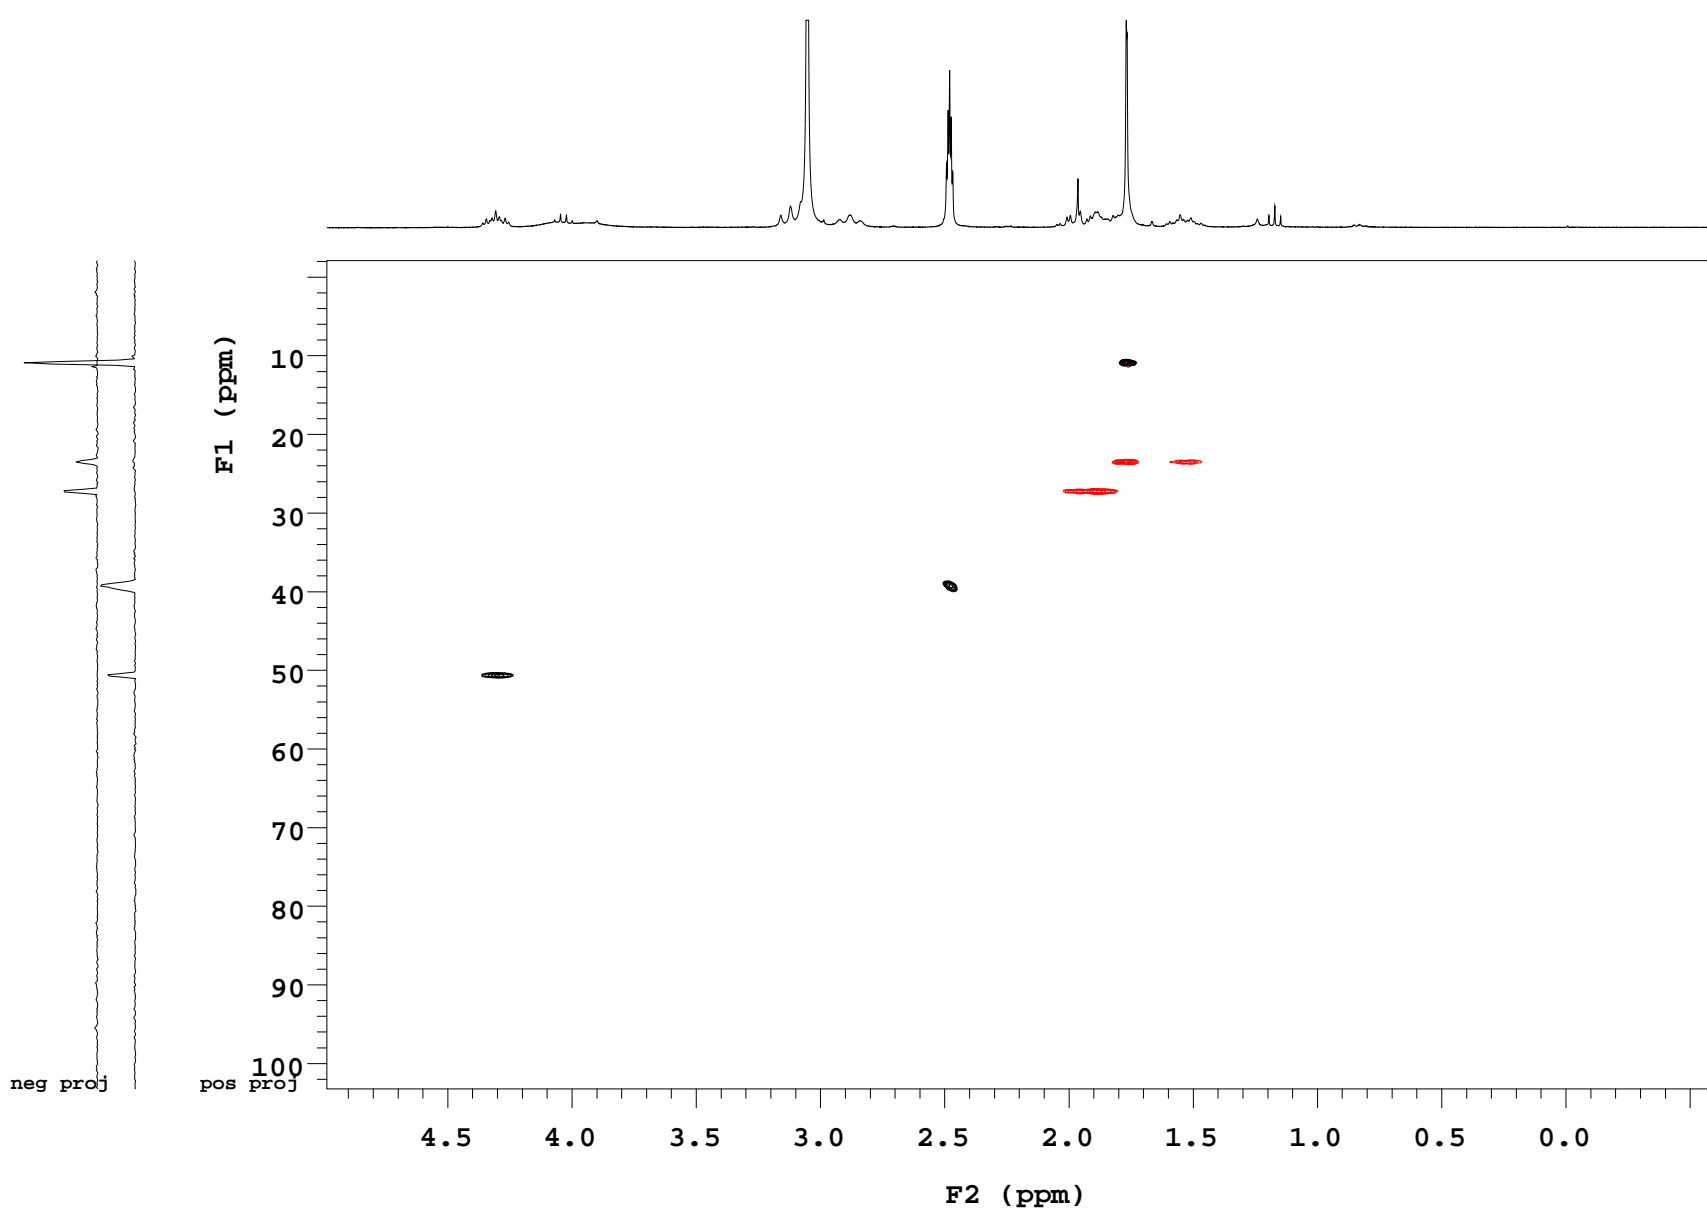

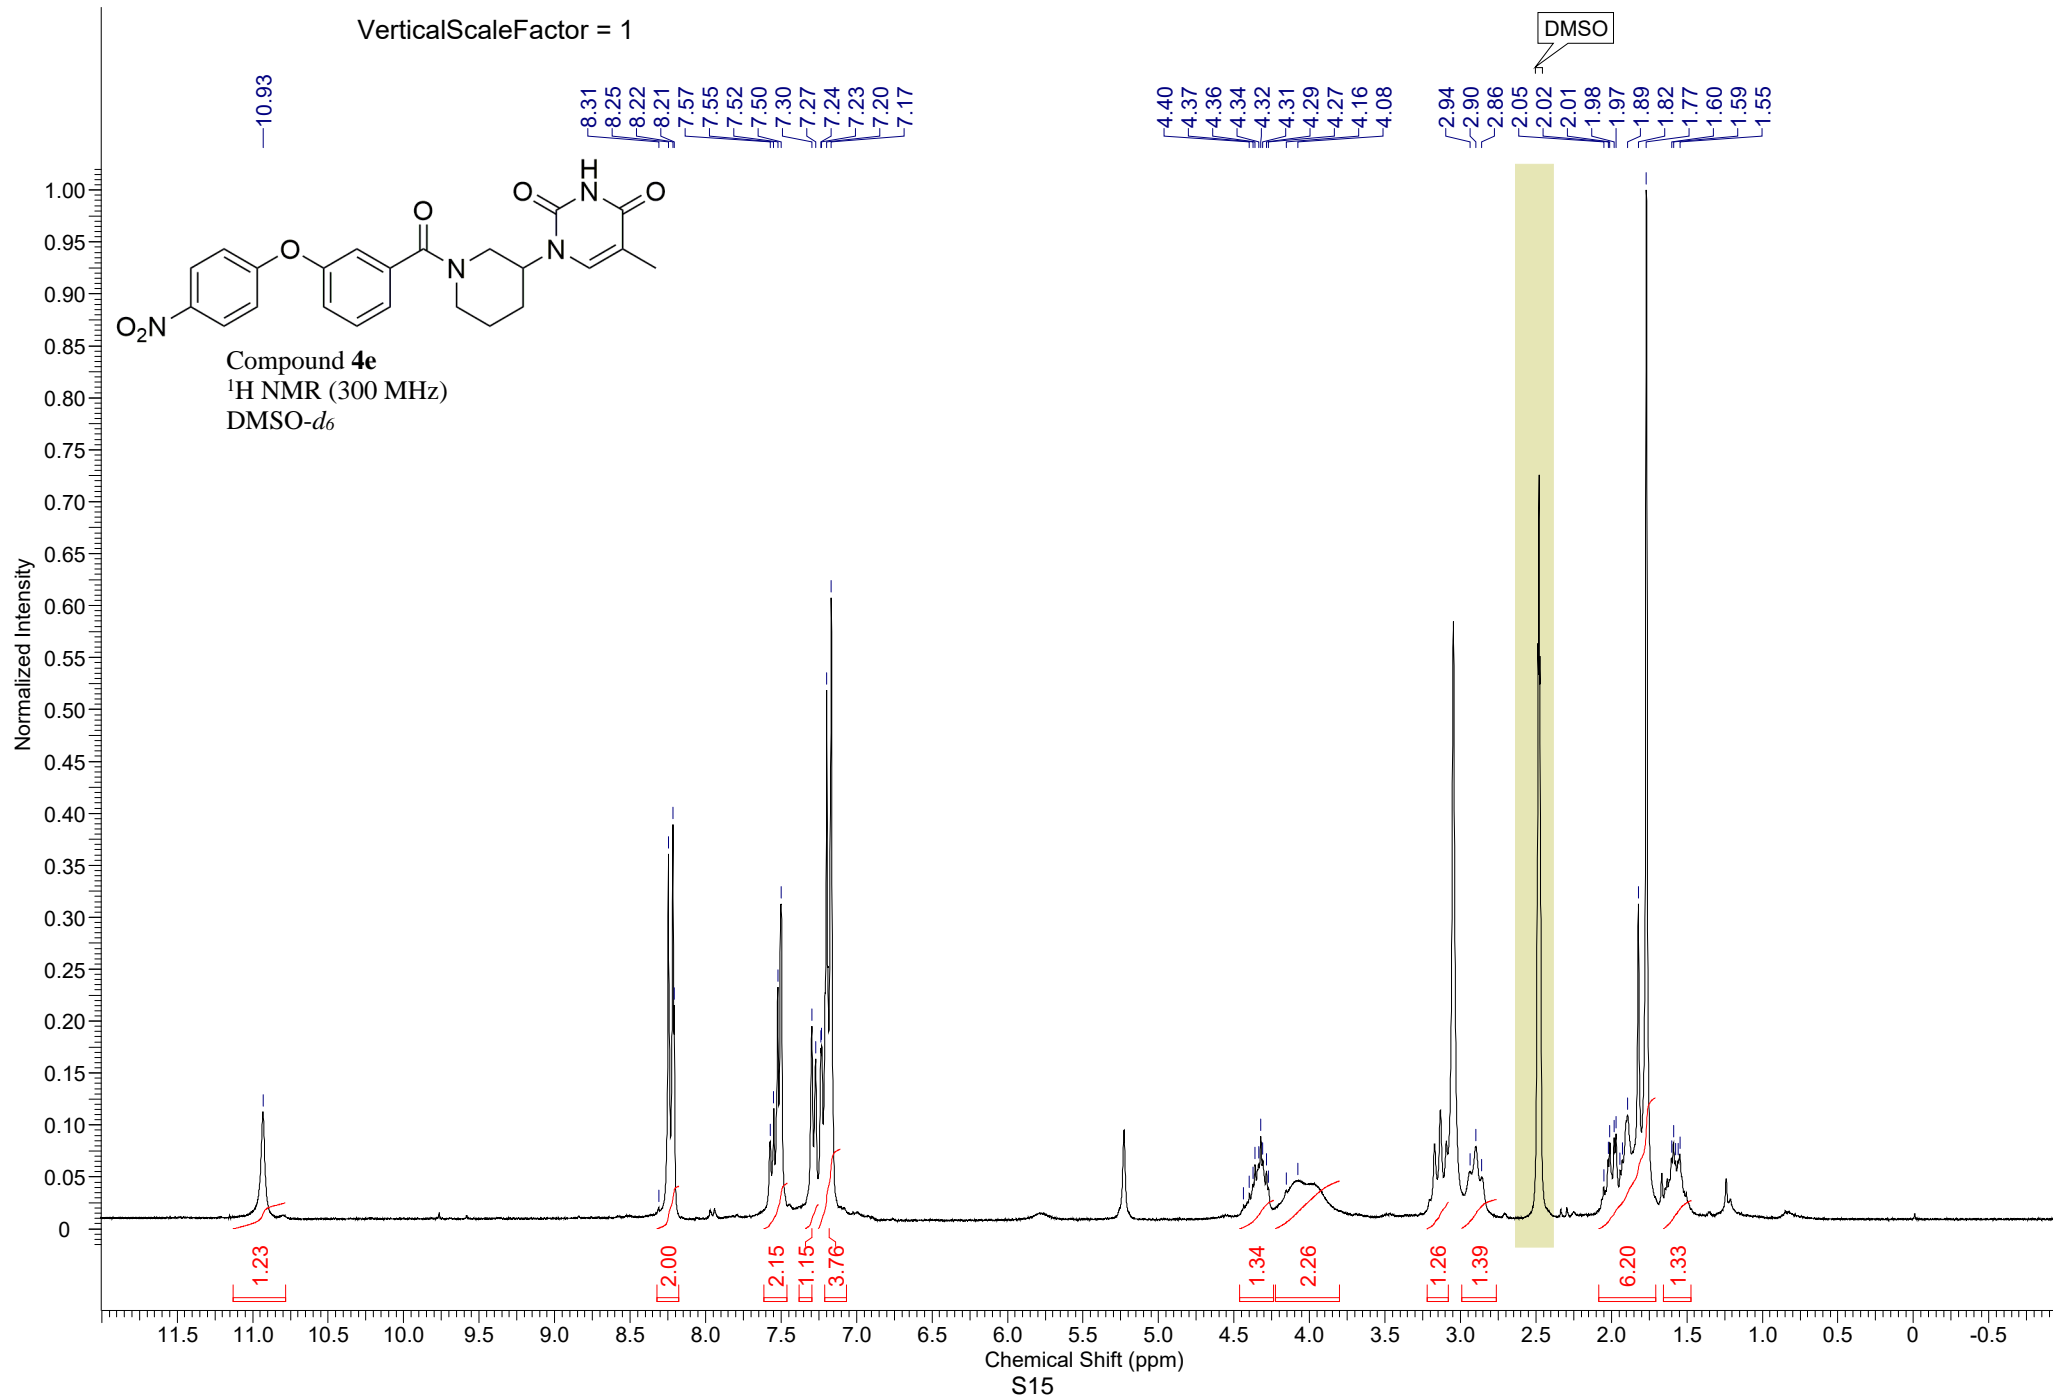

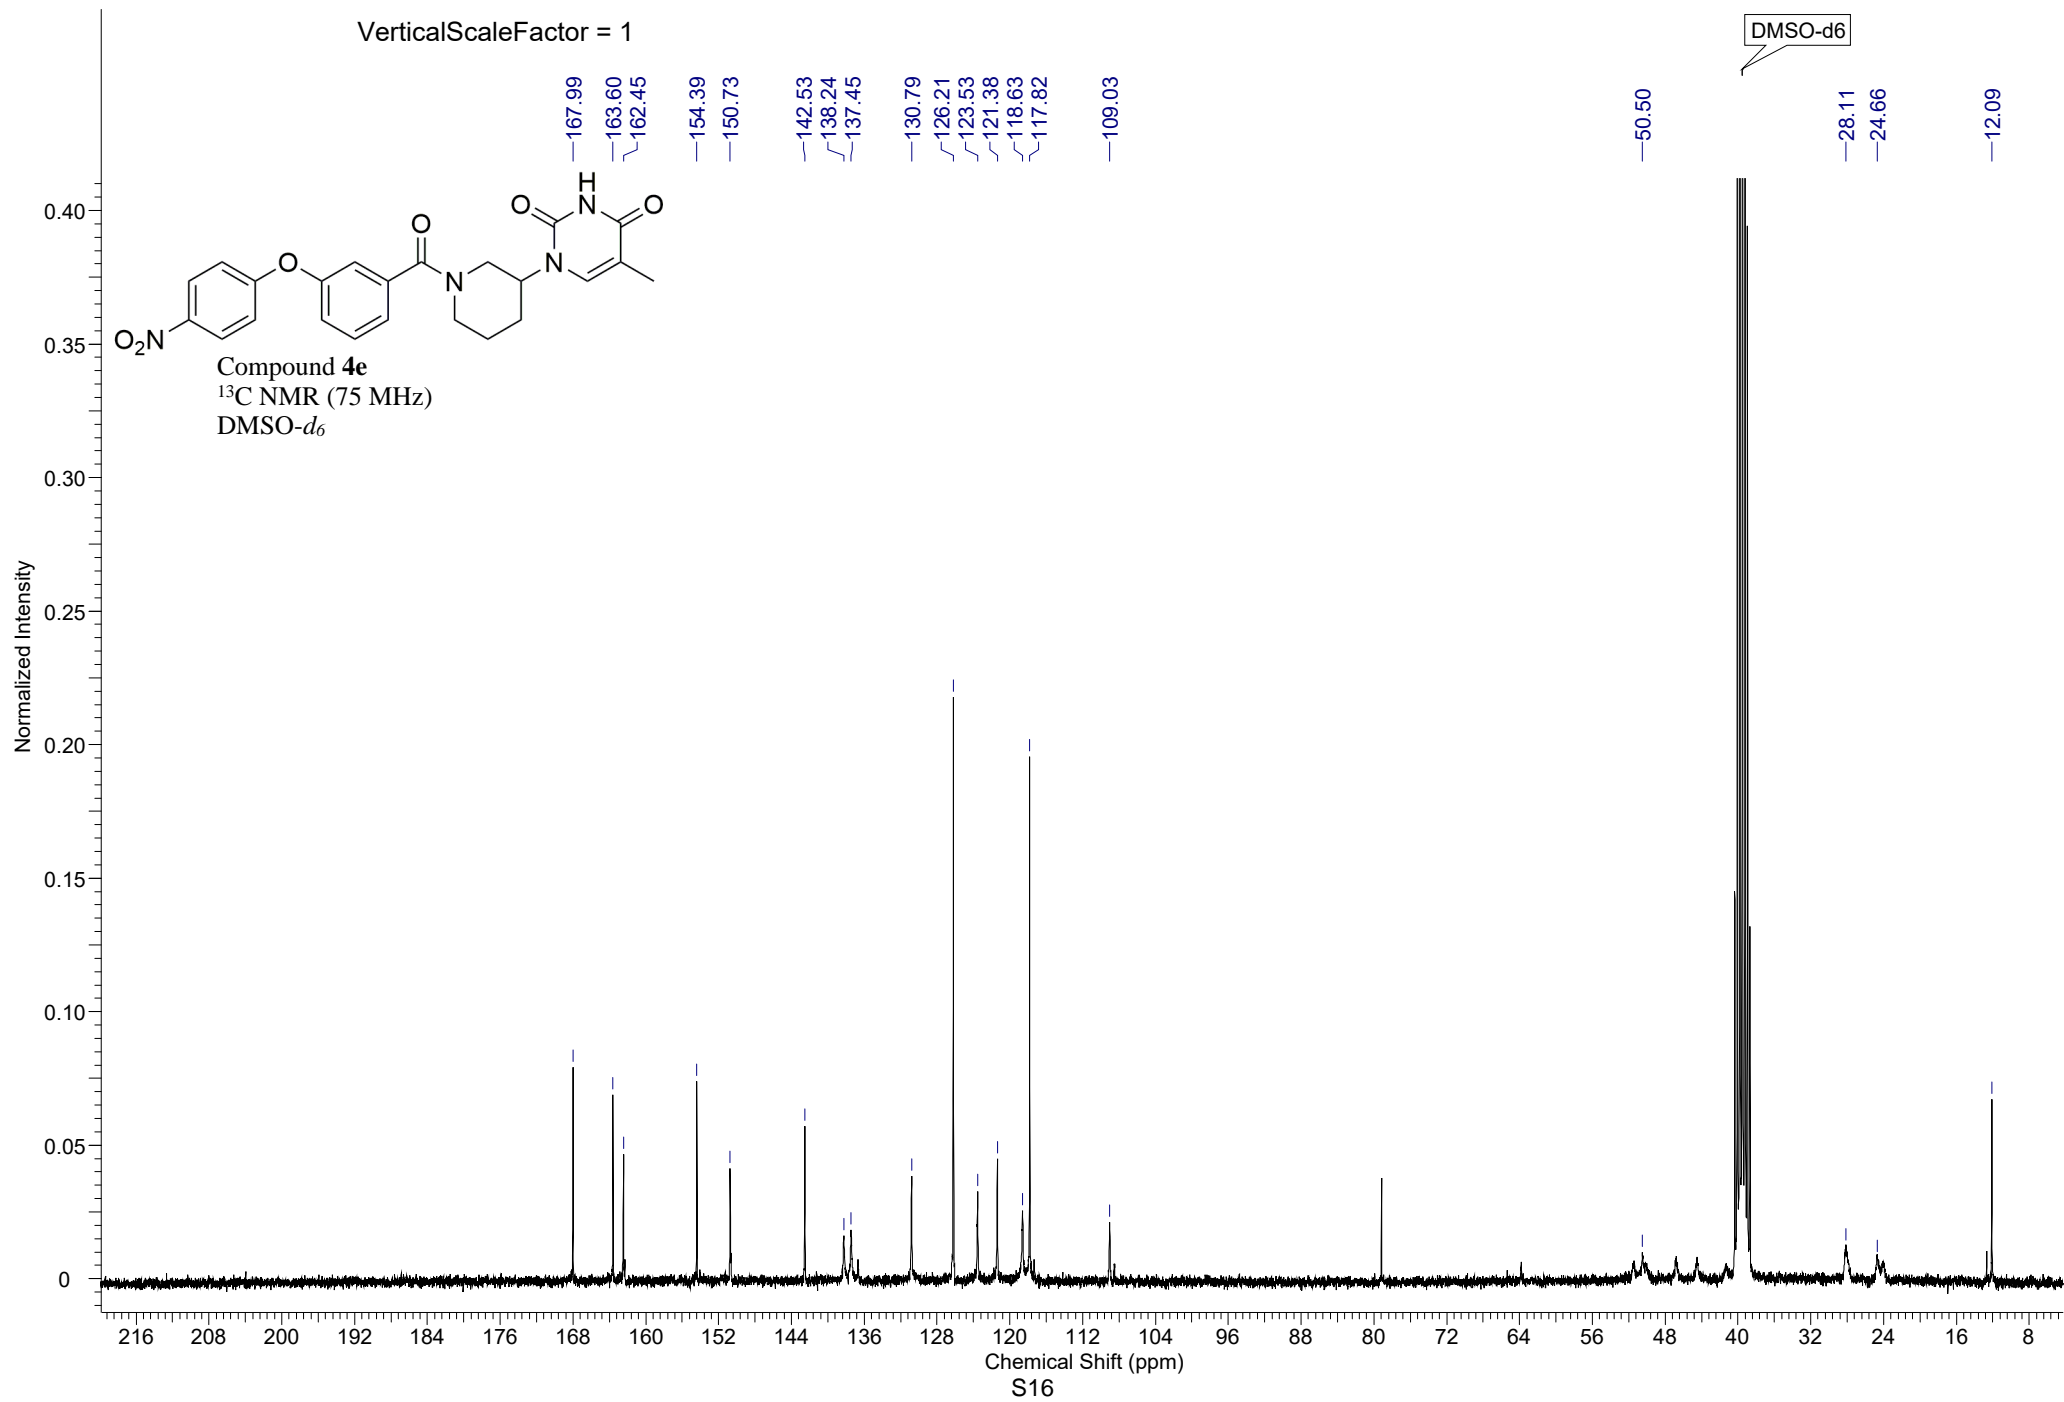



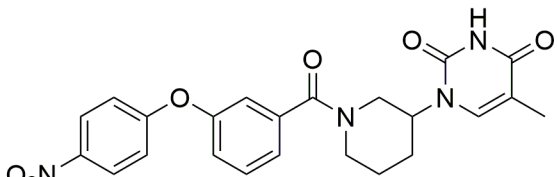

Compound 4e  
HSQC  
DMSO-*d*<sub>6</sub>

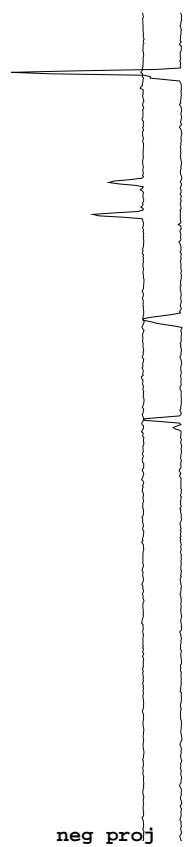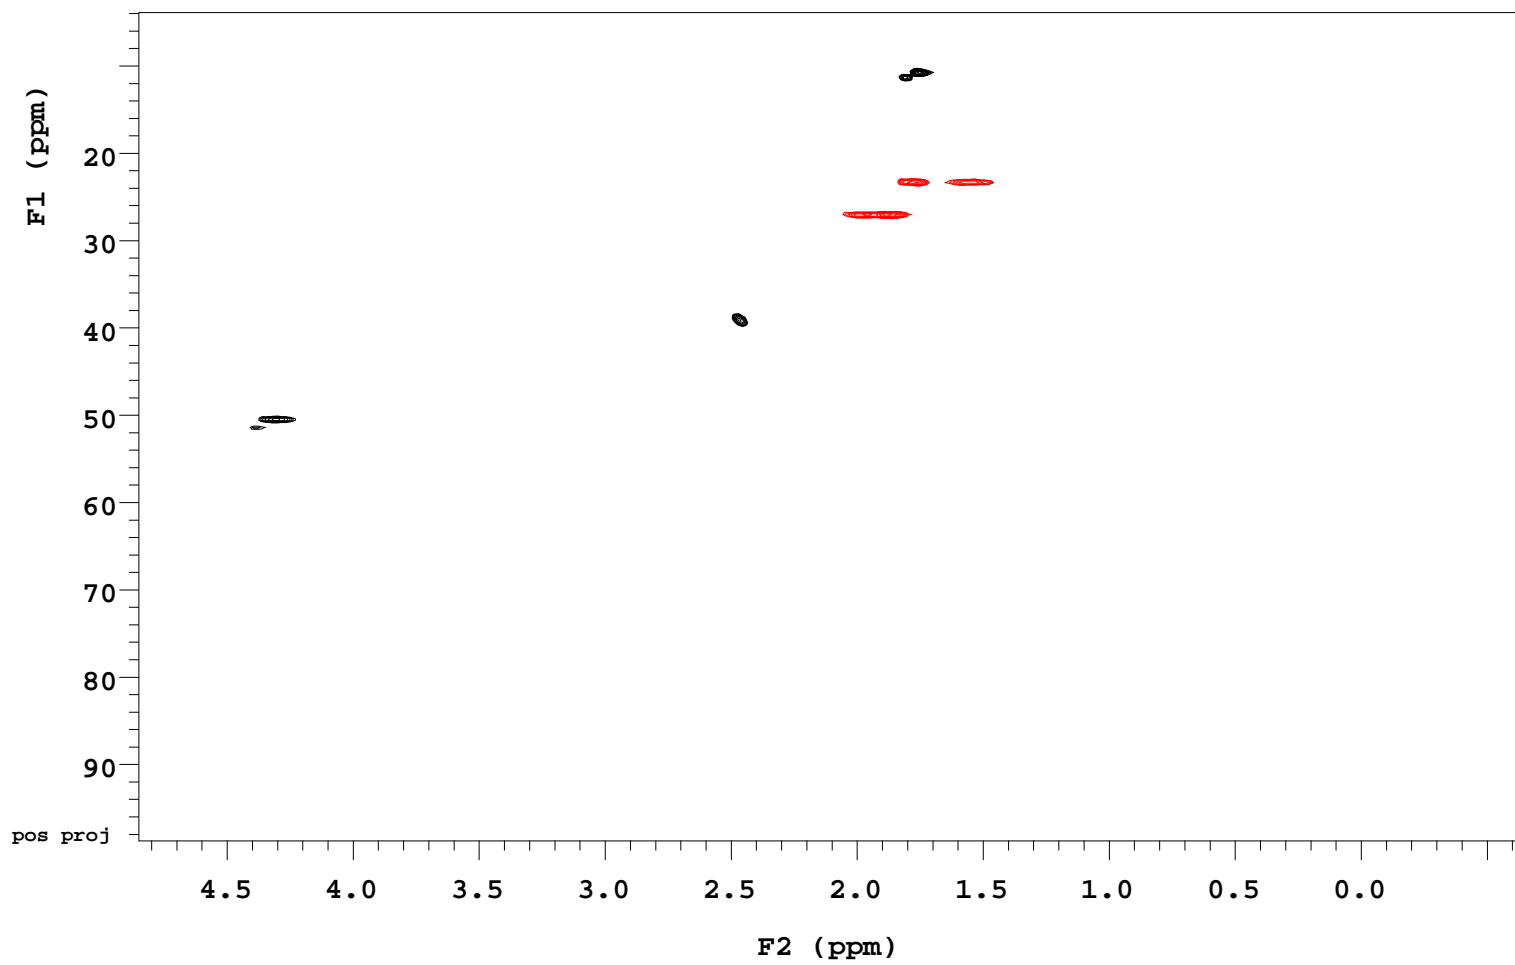

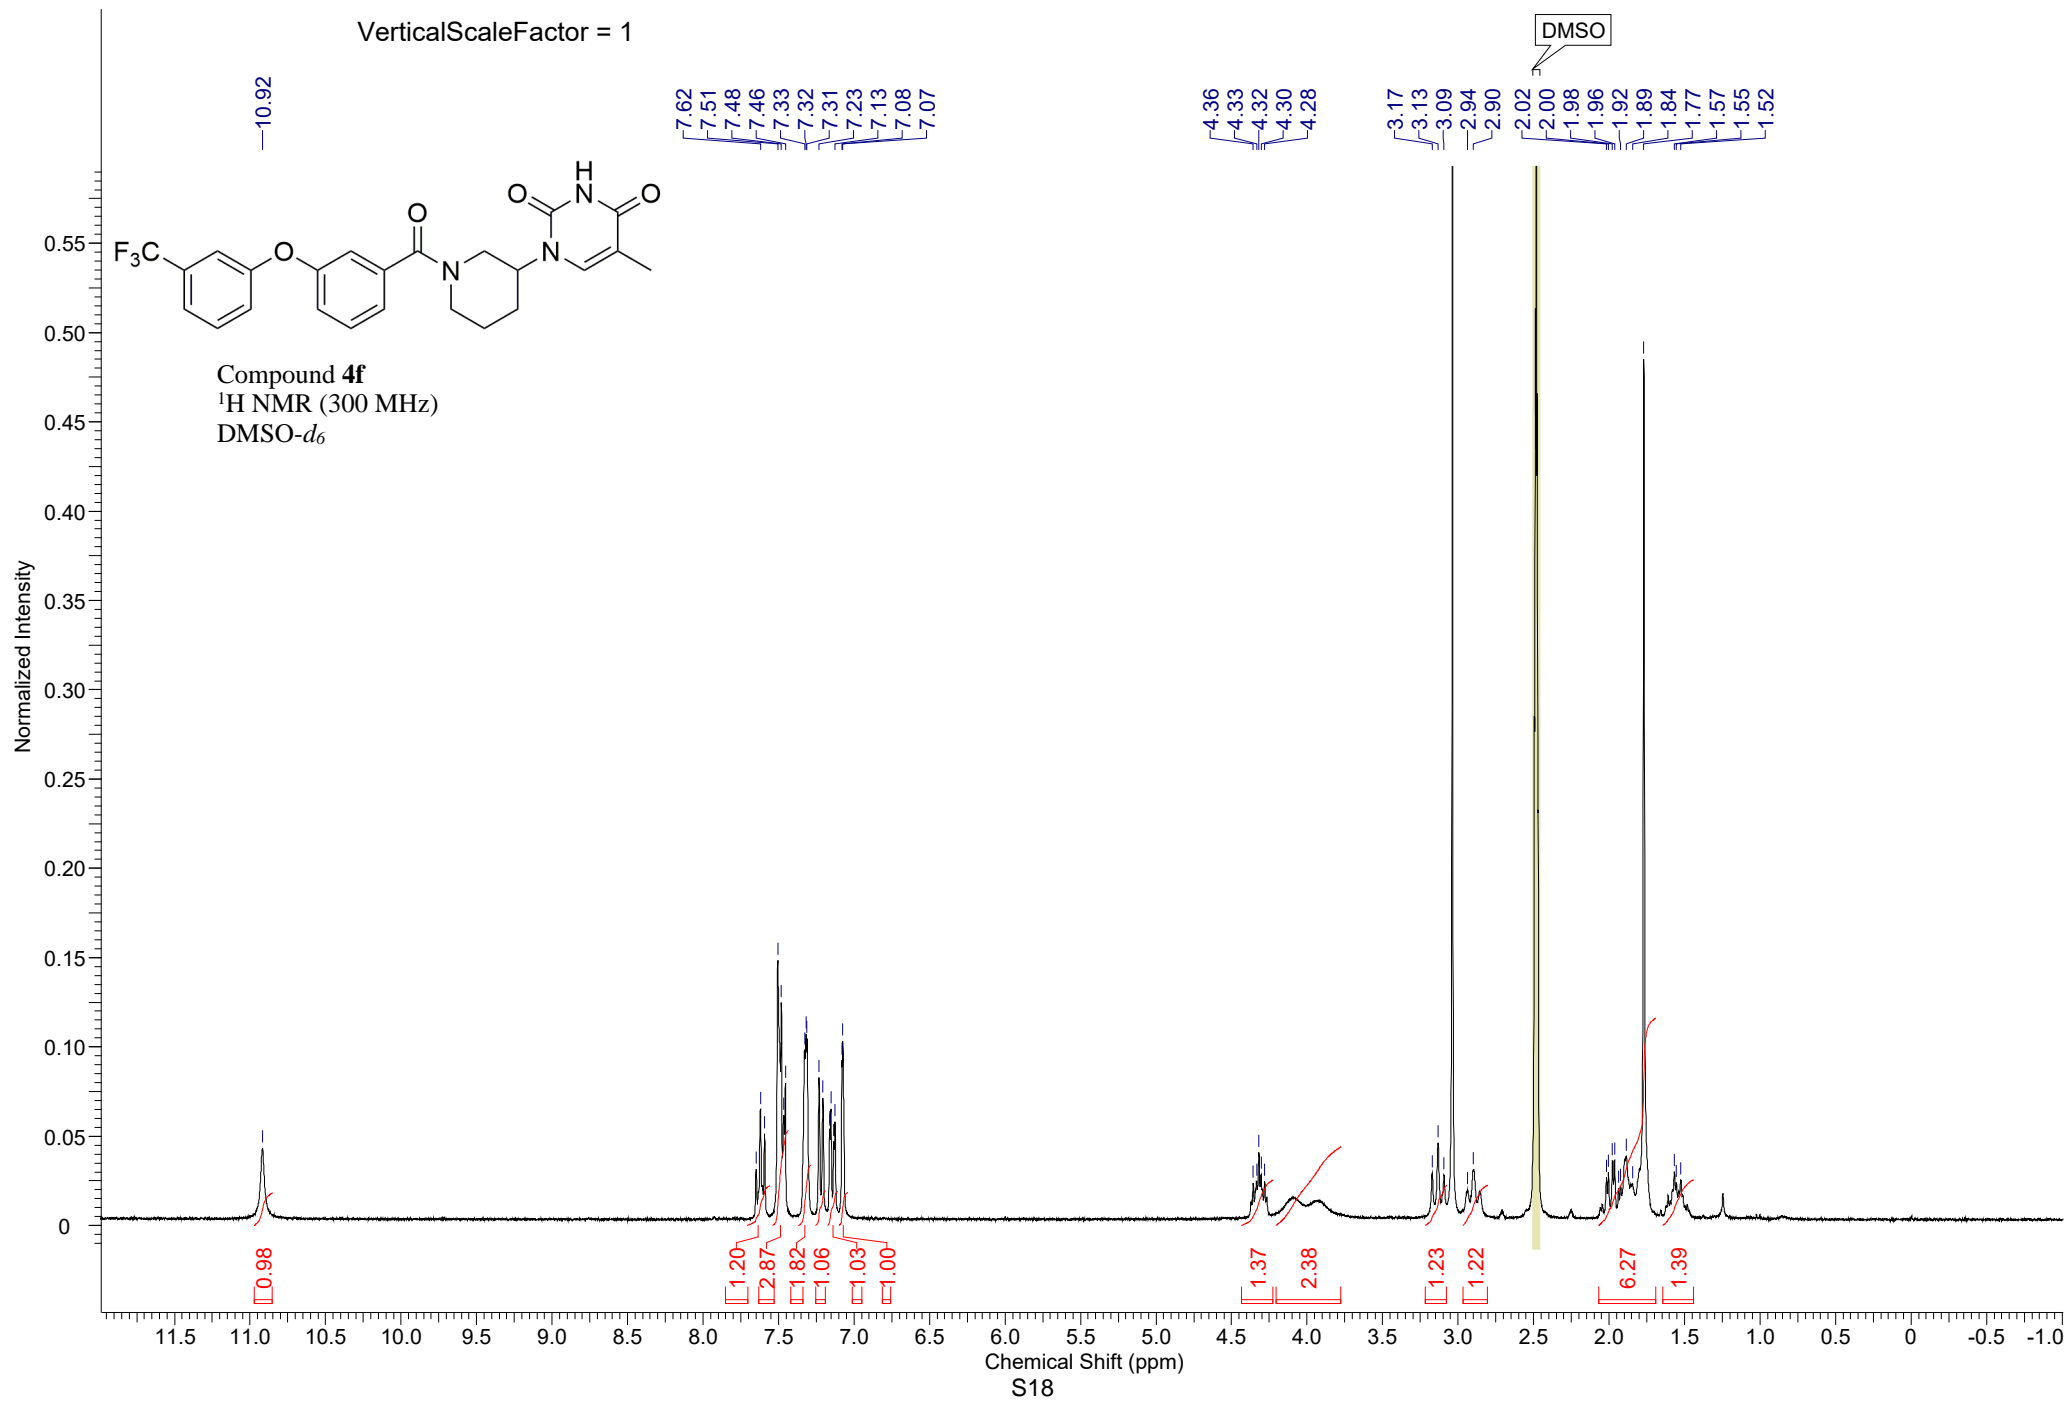

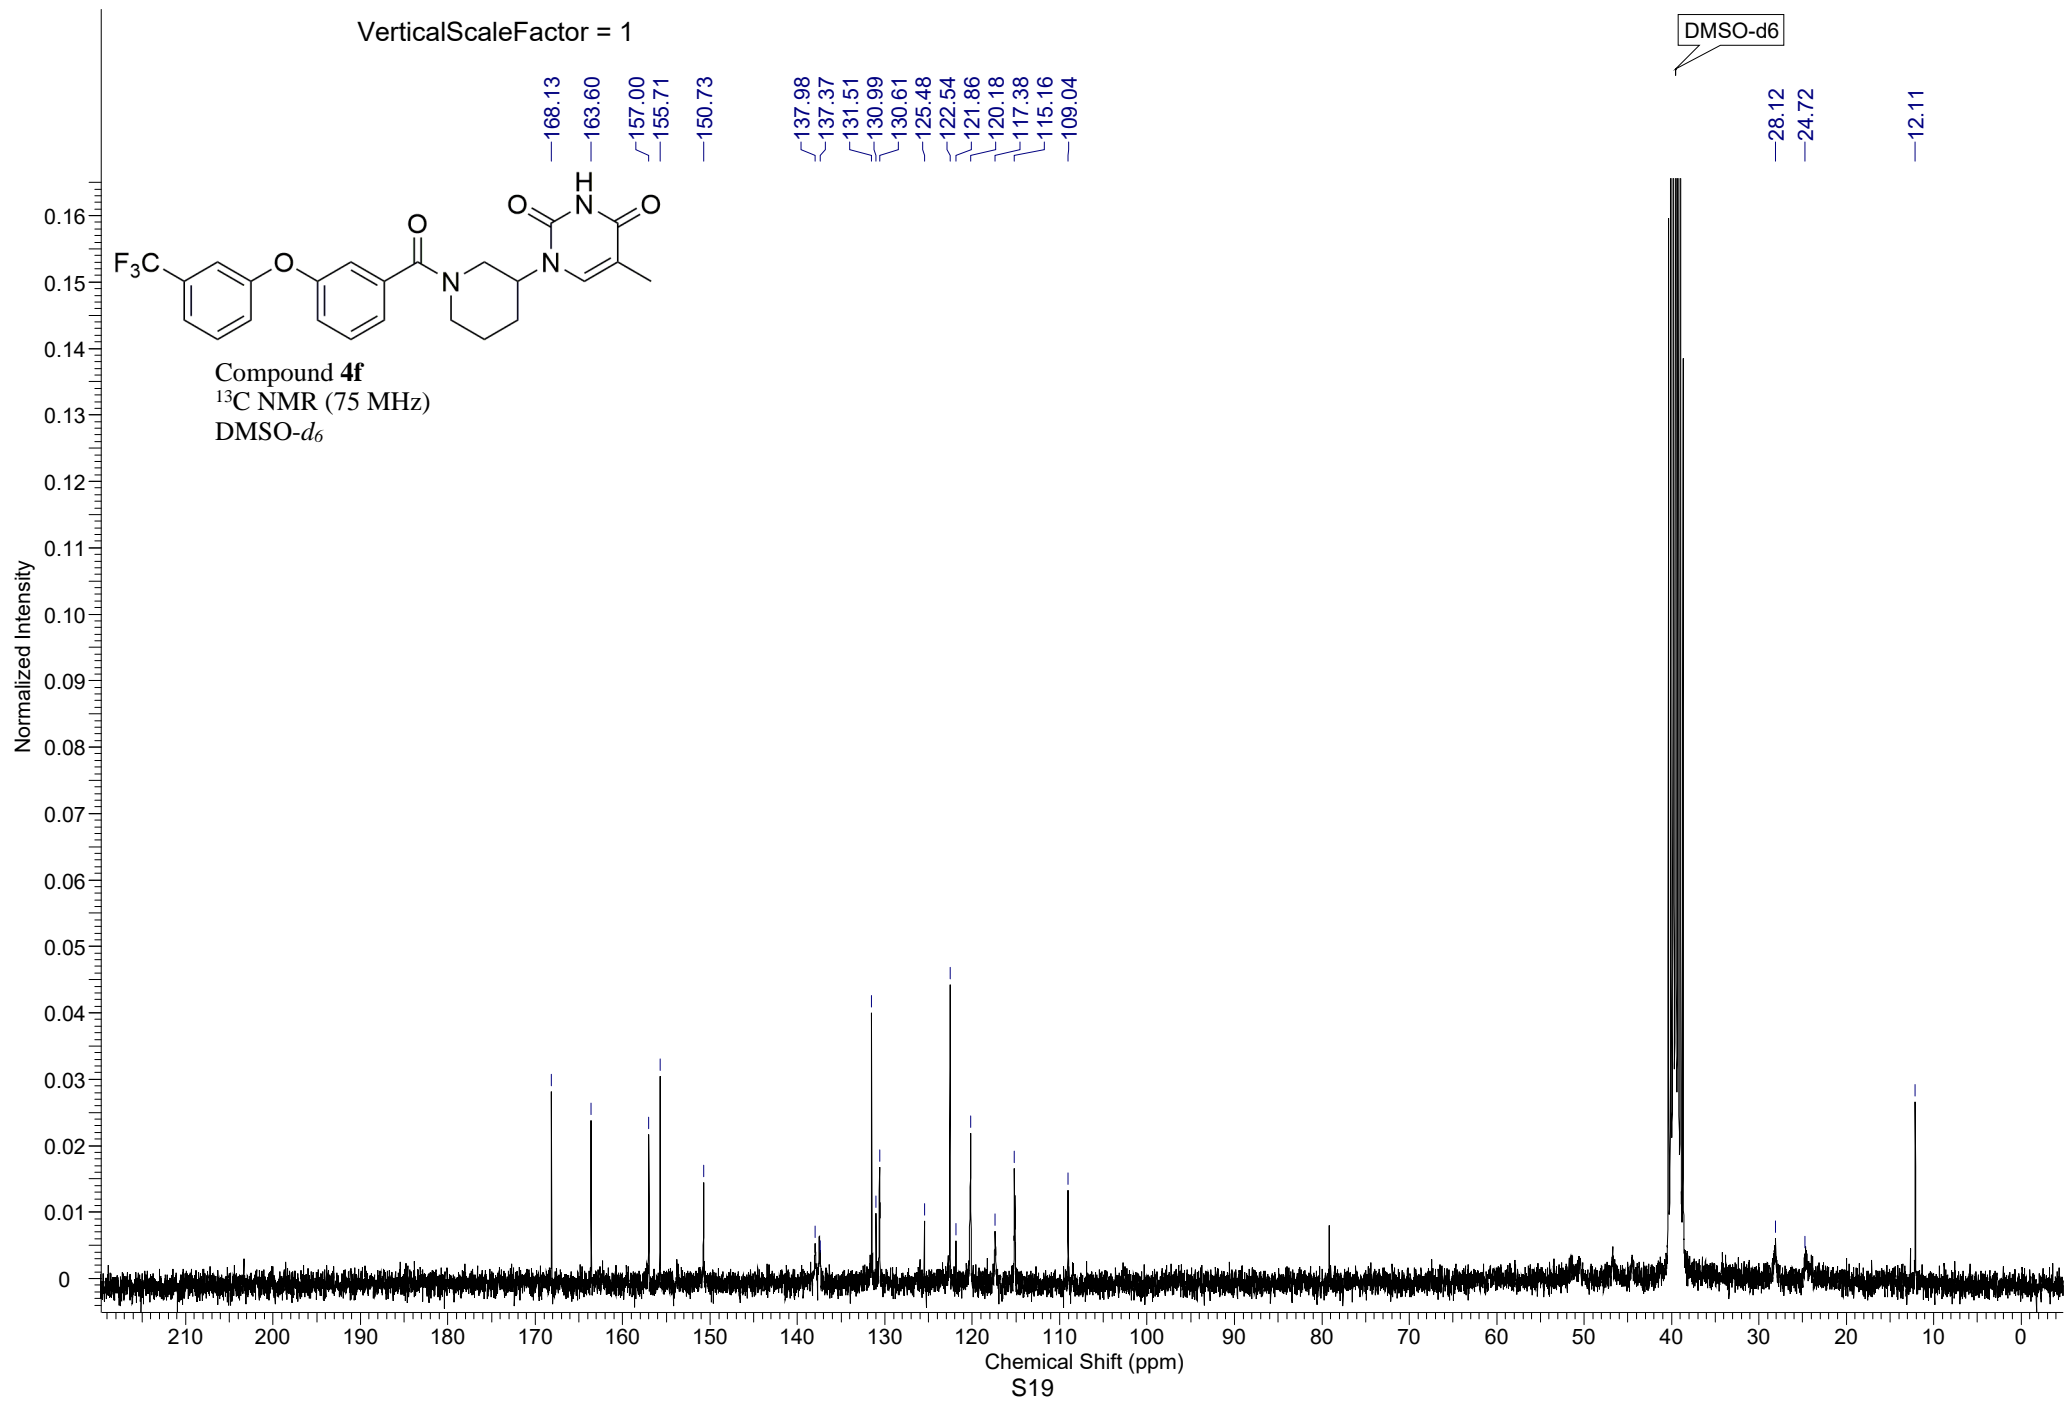

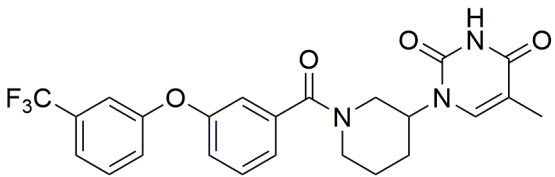

Compound **4f**  
HSQC  
DMSO-*d*<sub>6</sub>

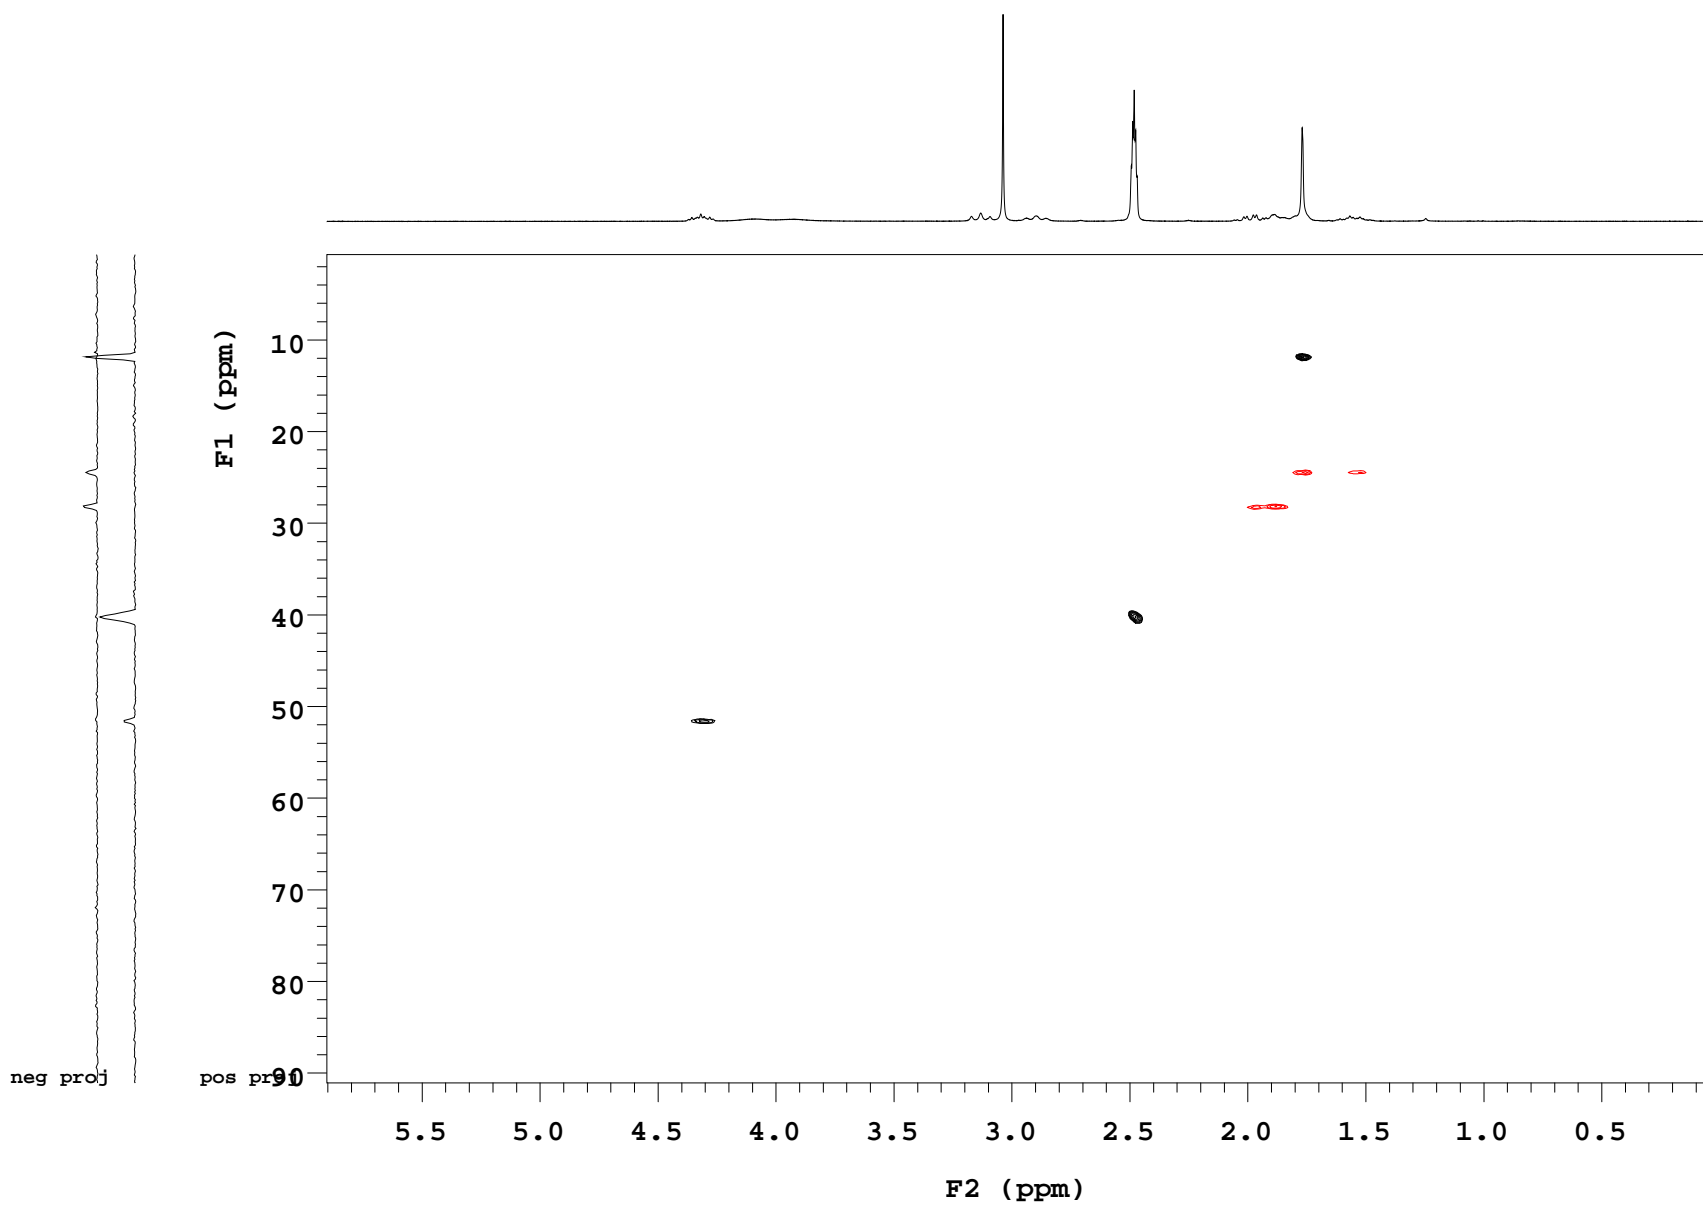

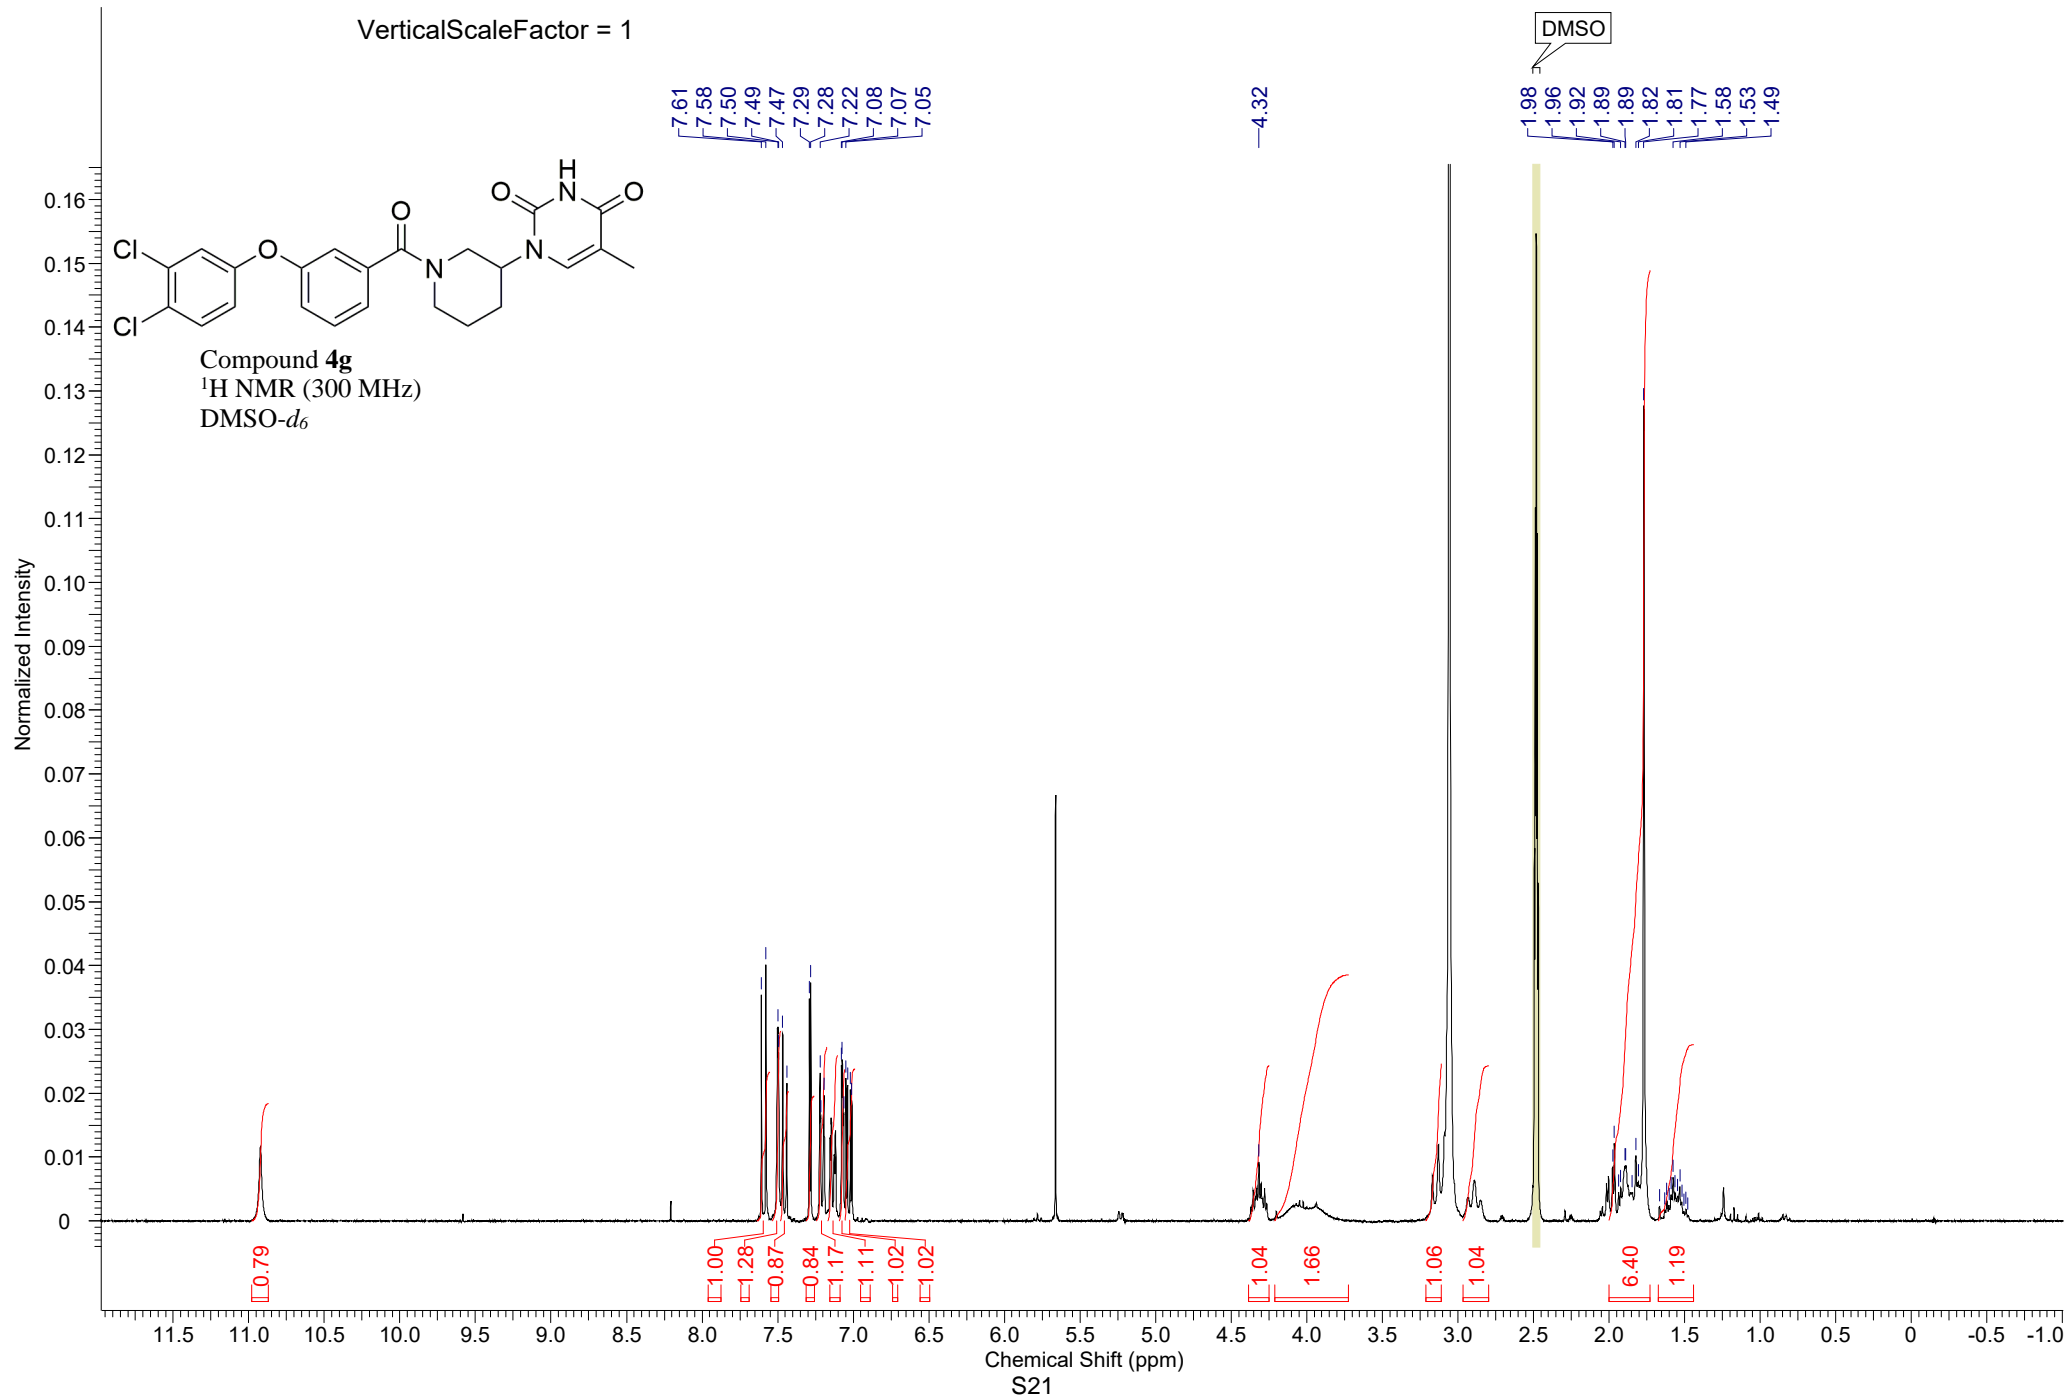

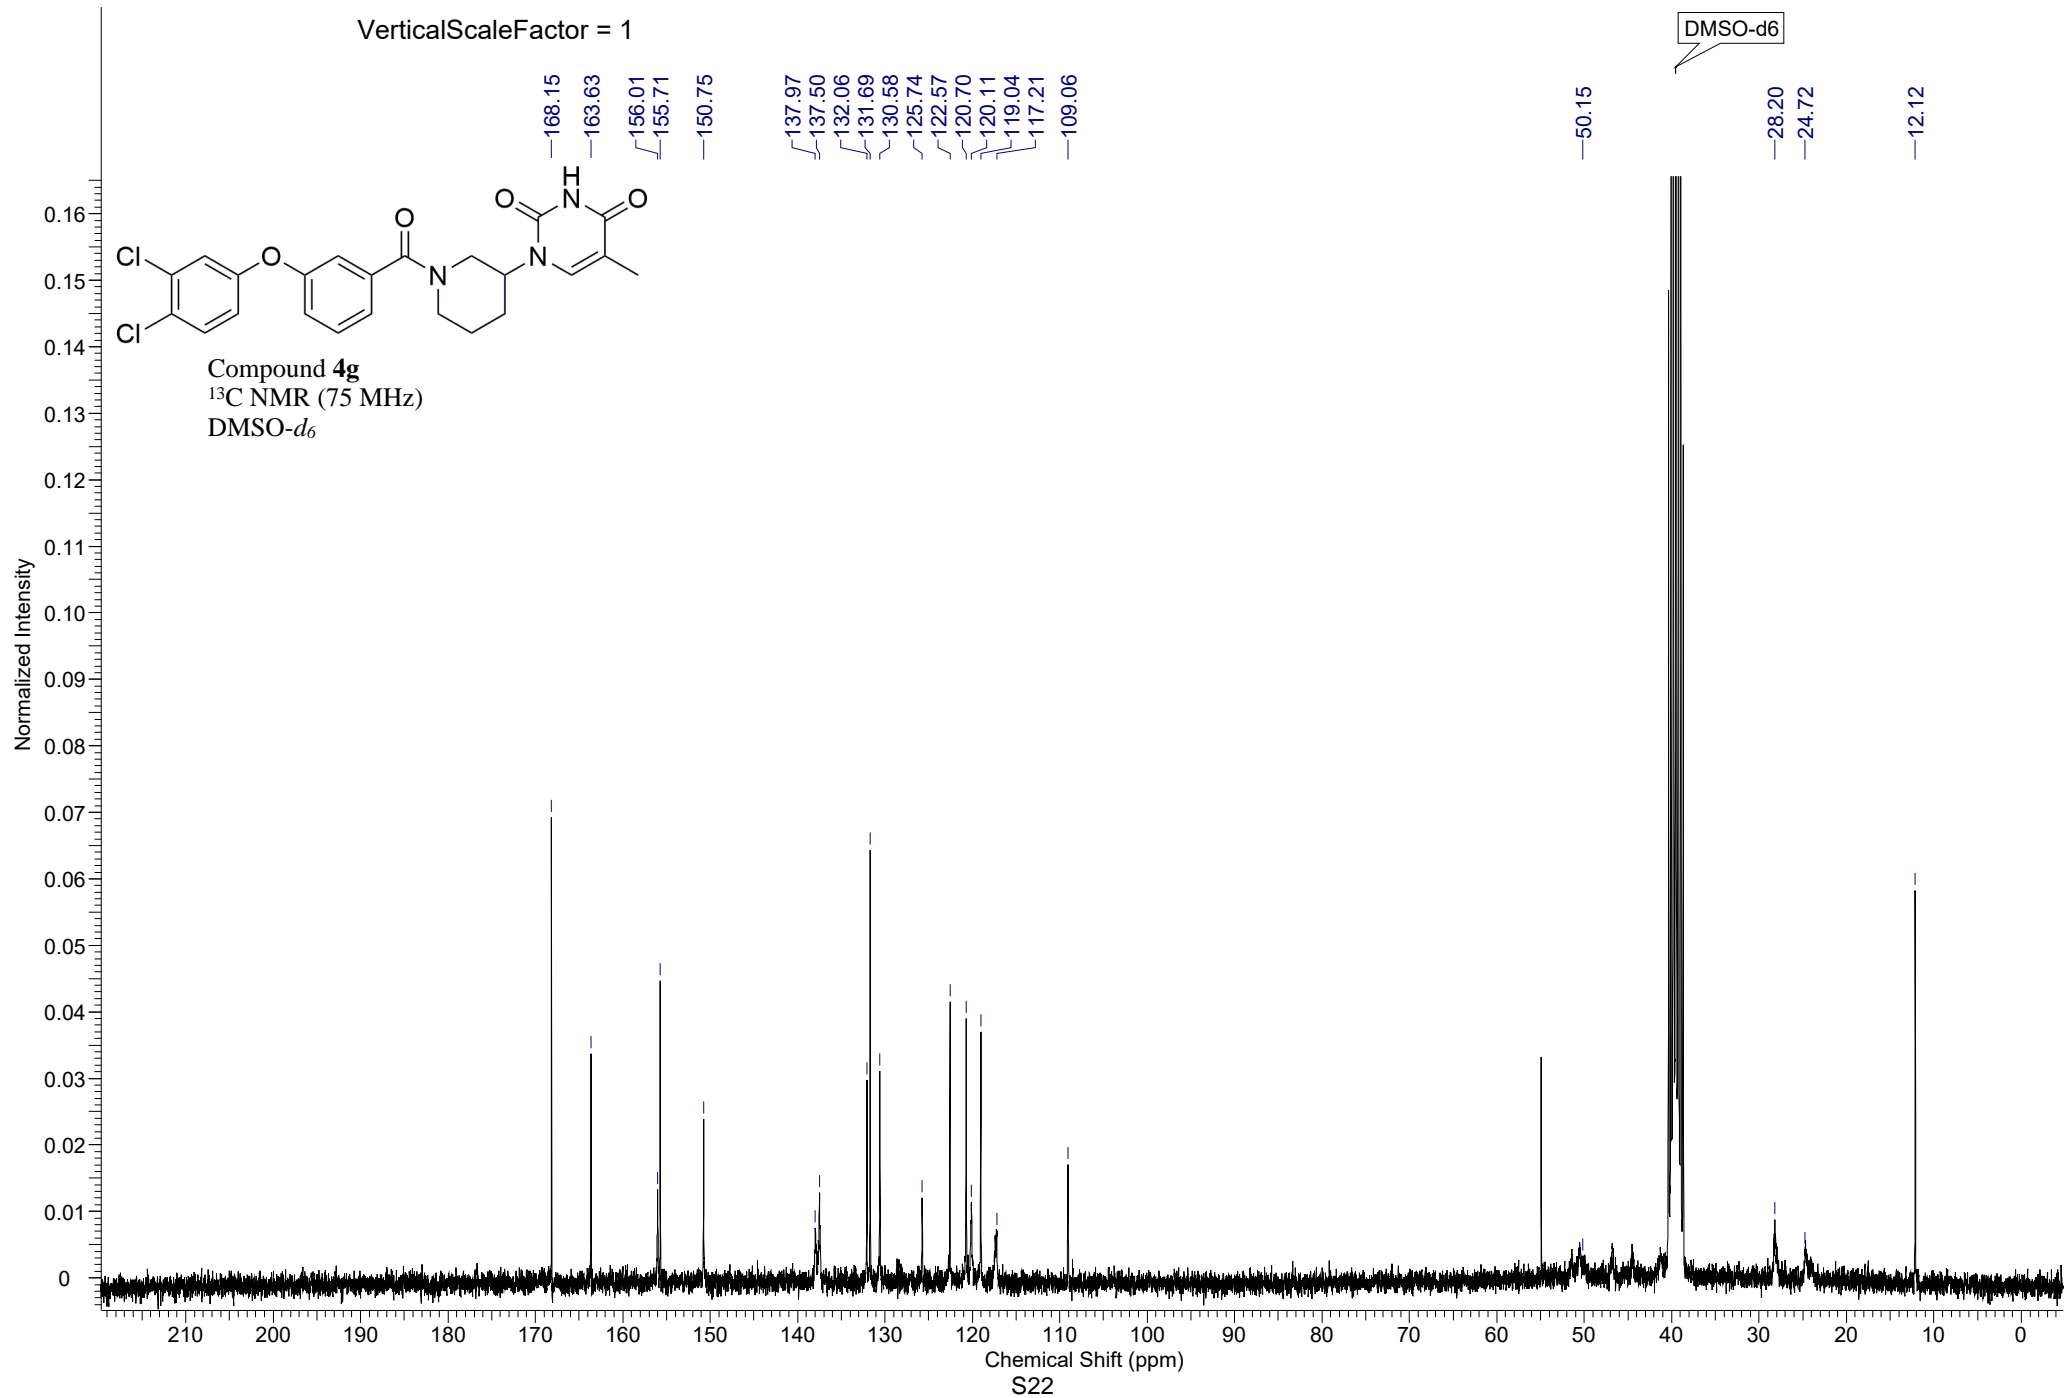

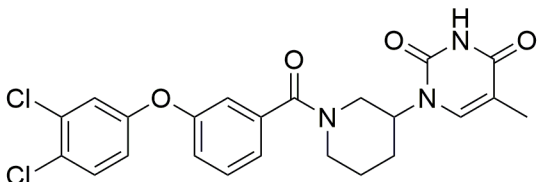

Compound **4g**  
HSQC  
DMSO-*d*<sub>6</sub>

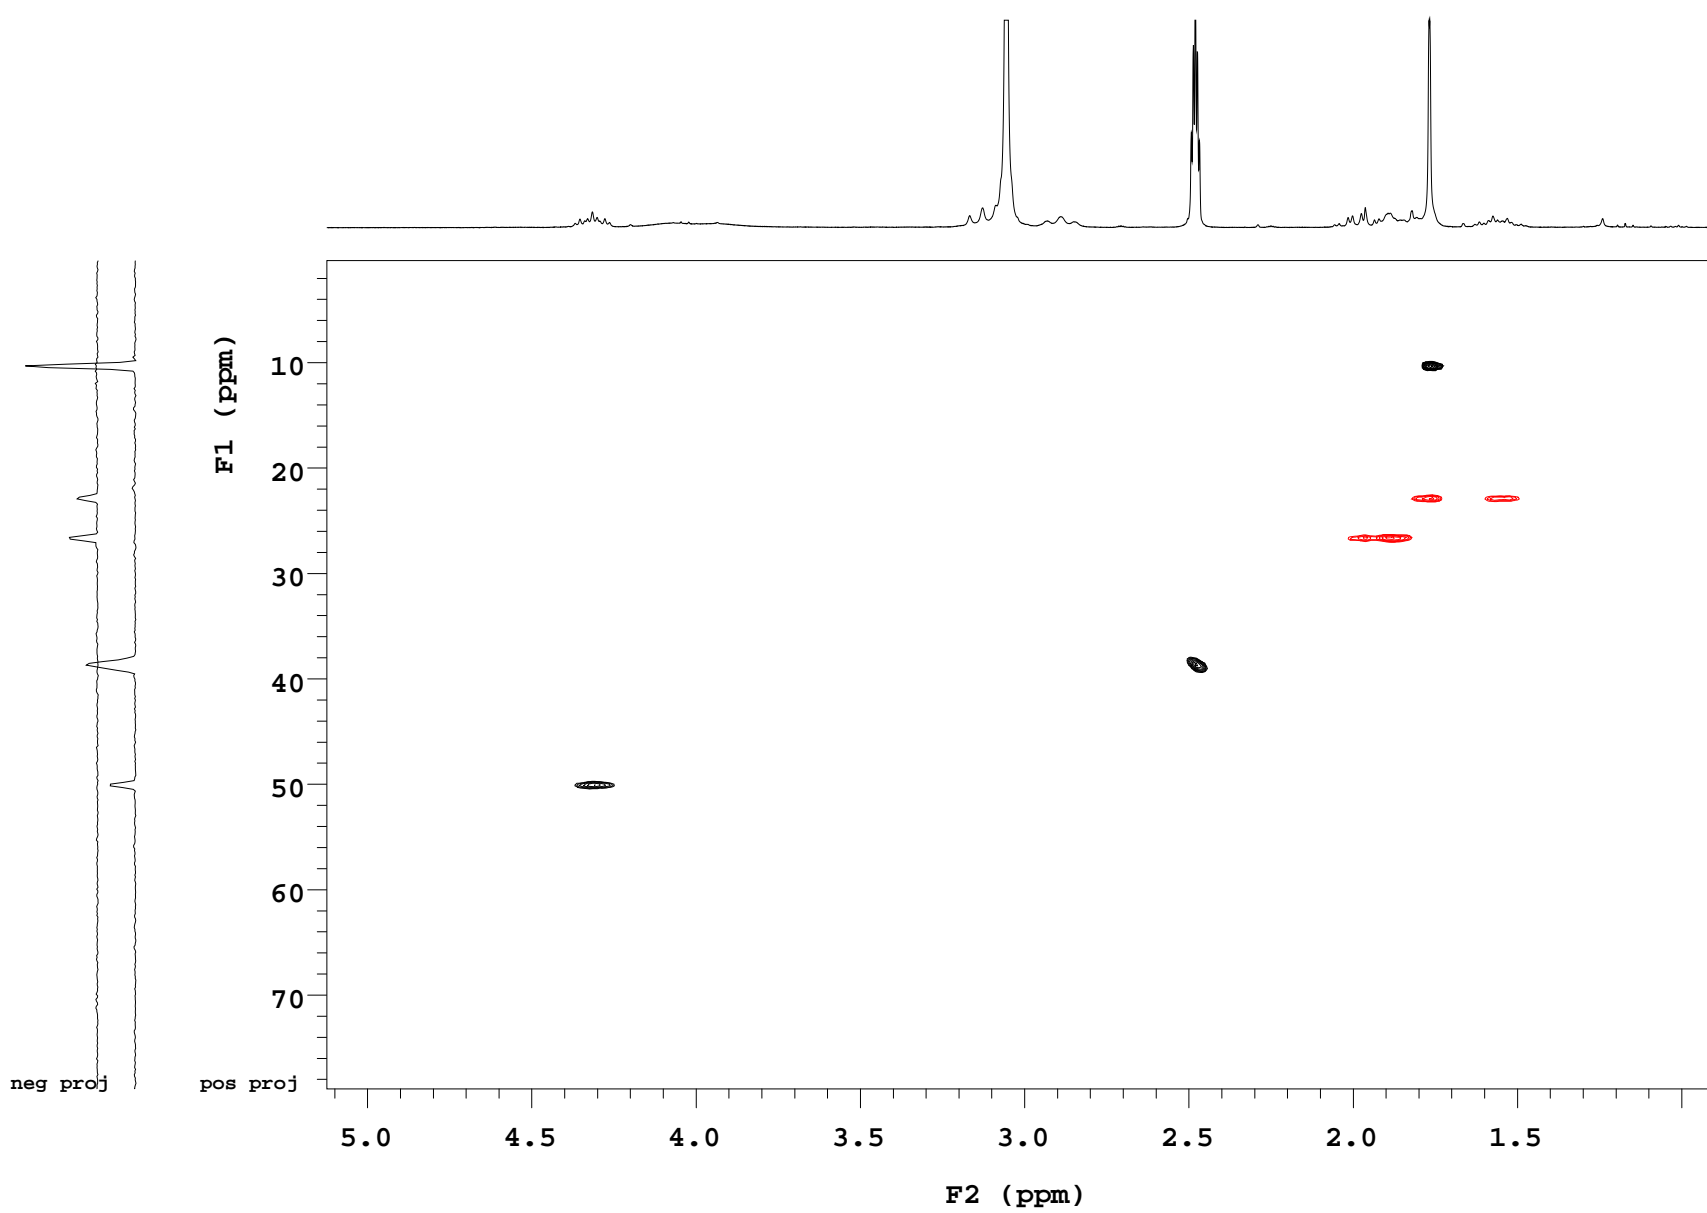

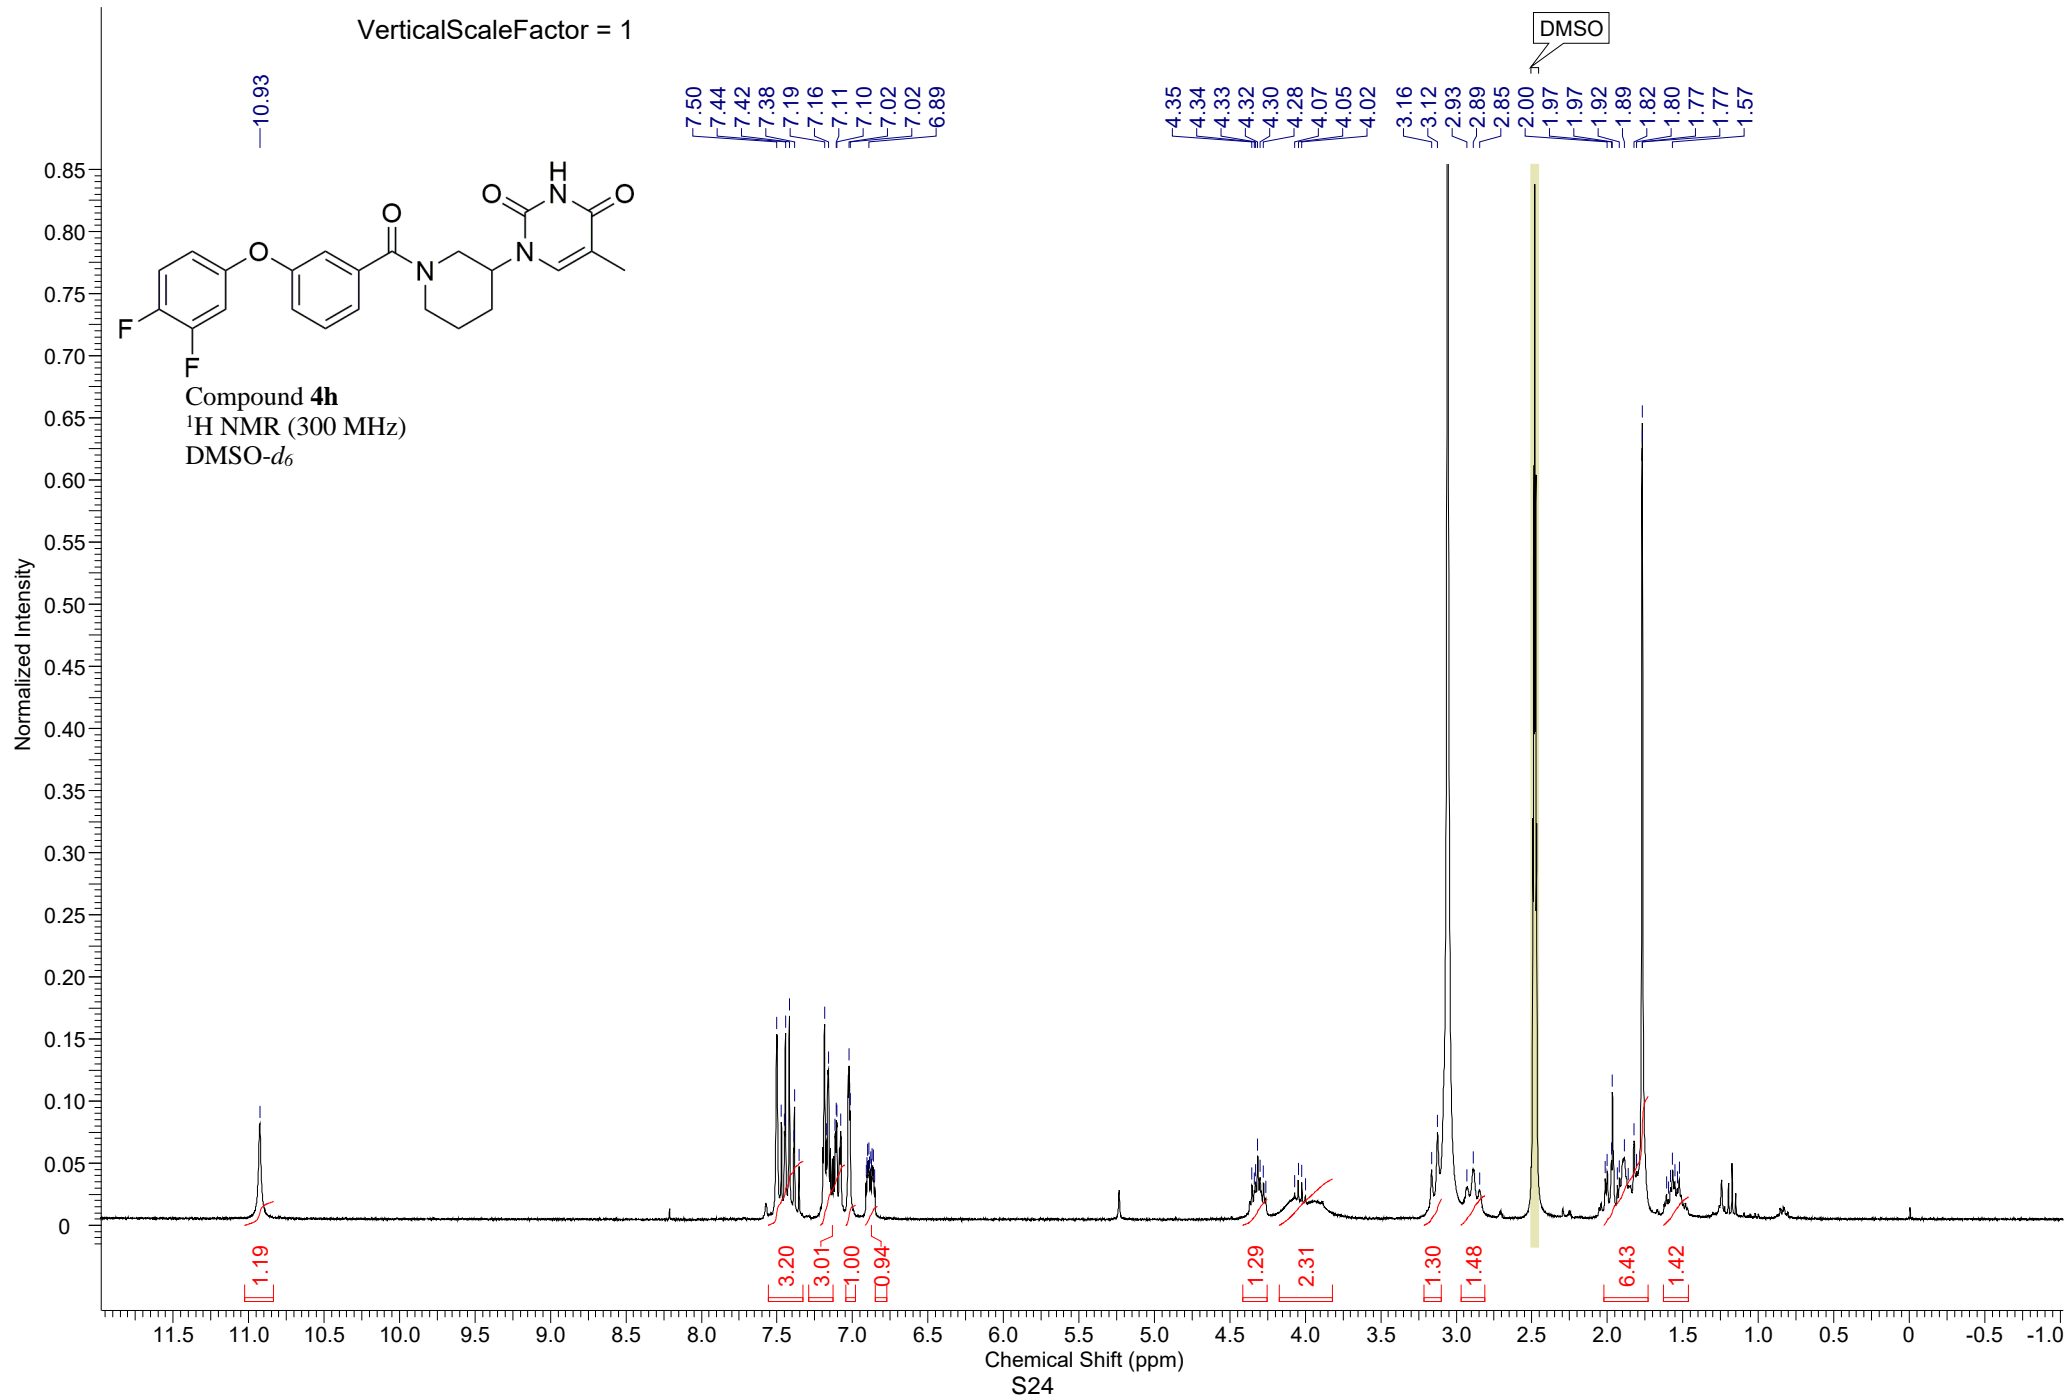



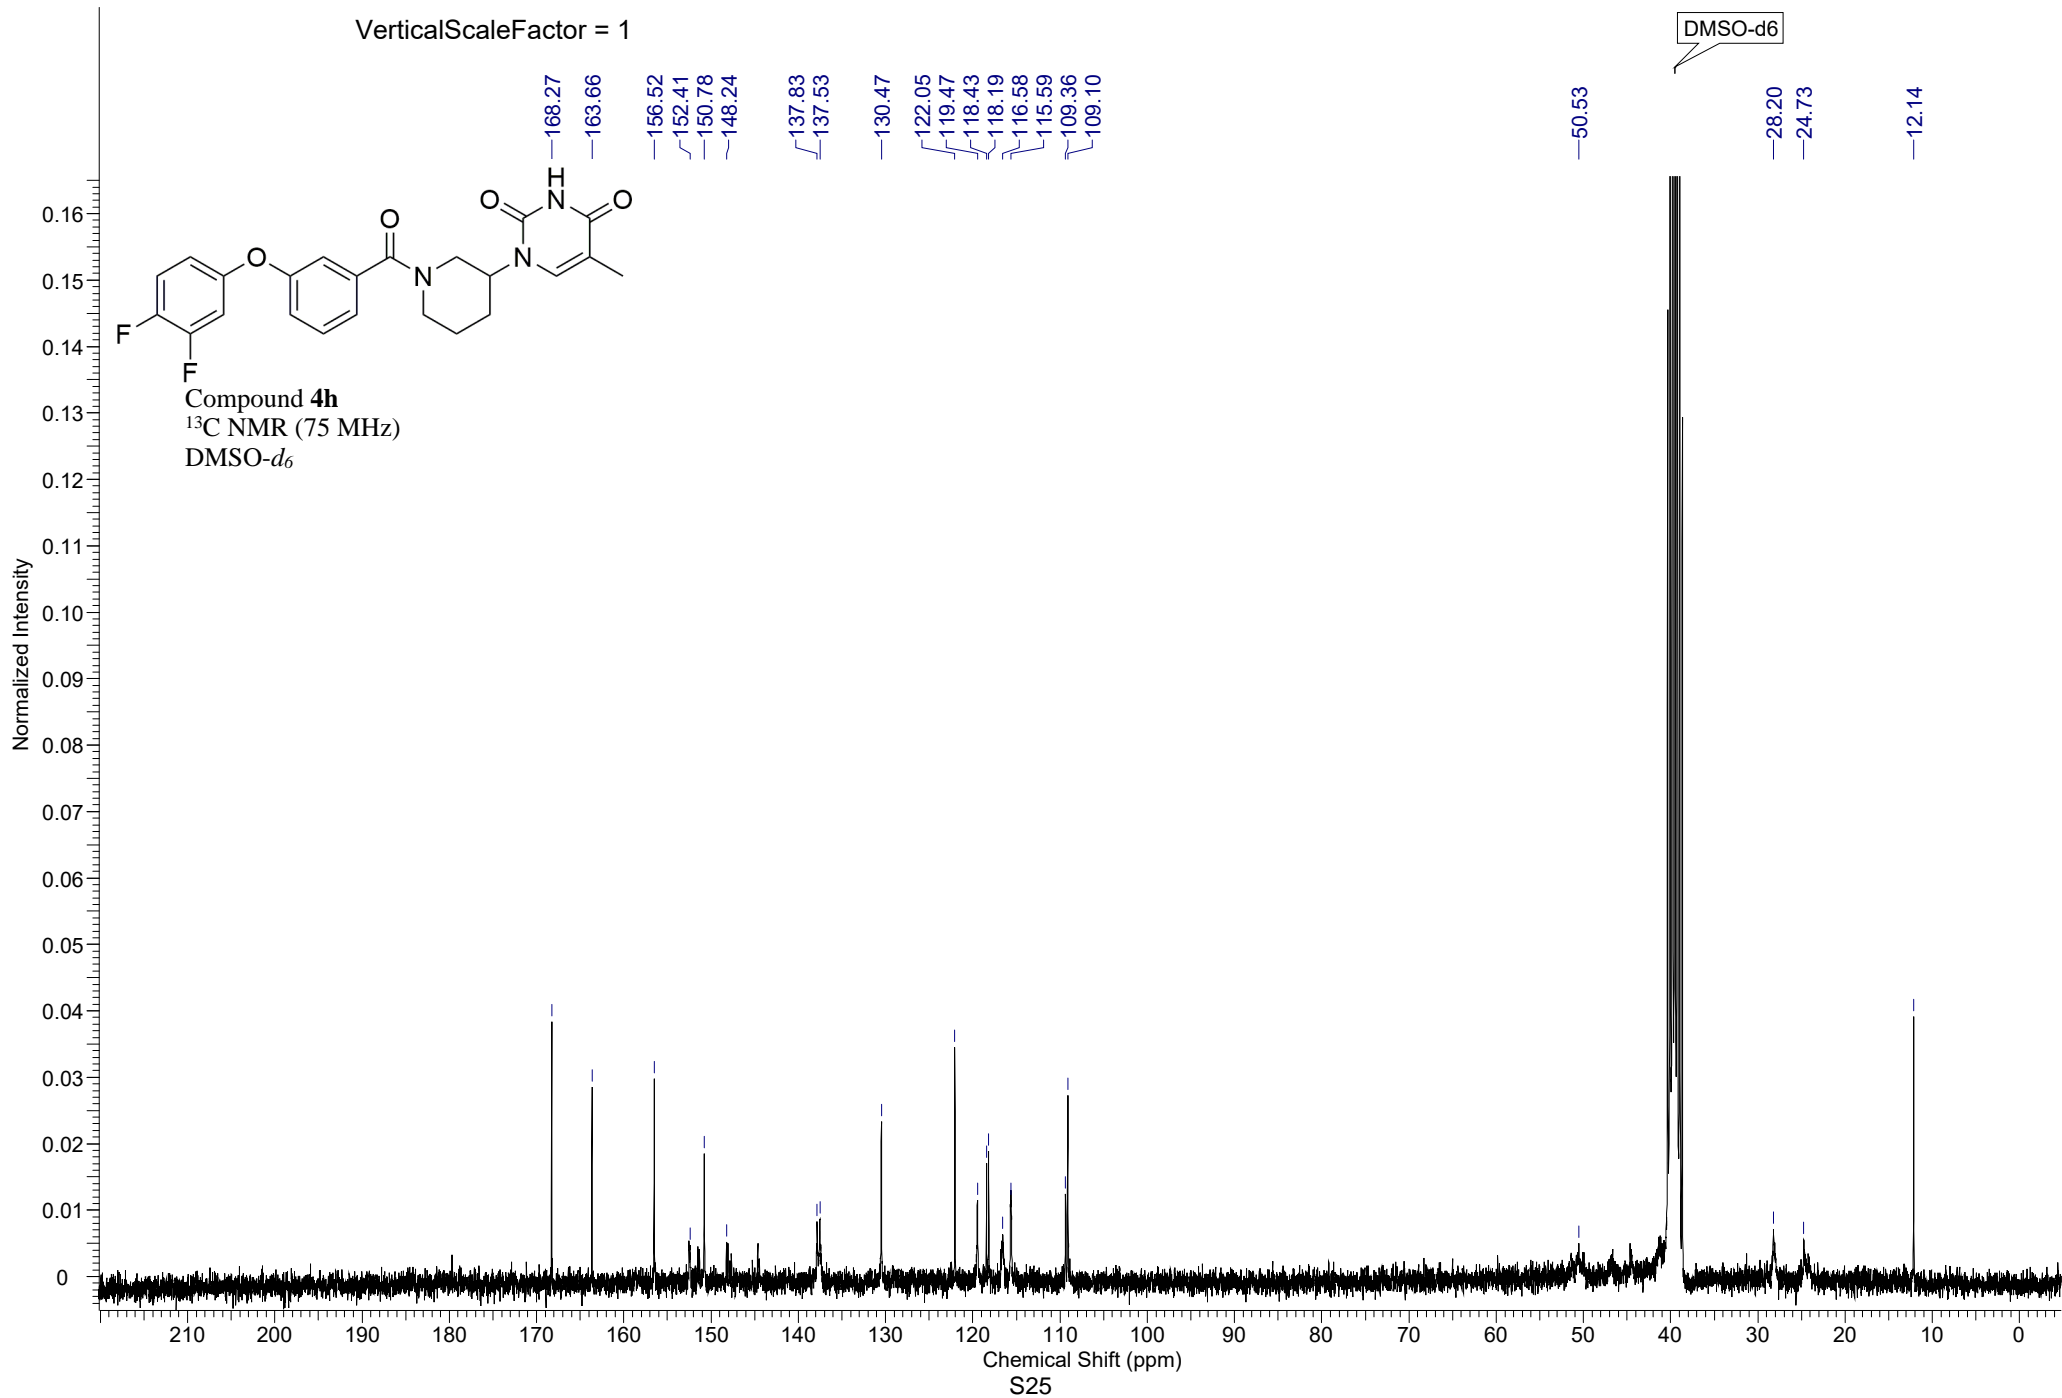

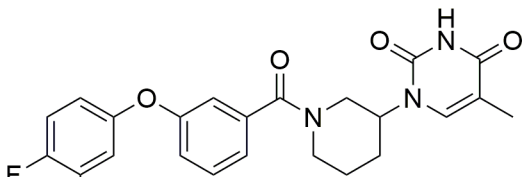

Compound **4h**

HSQC

DMSO-*d*<sub>6</sub>

neg proj

pos proj

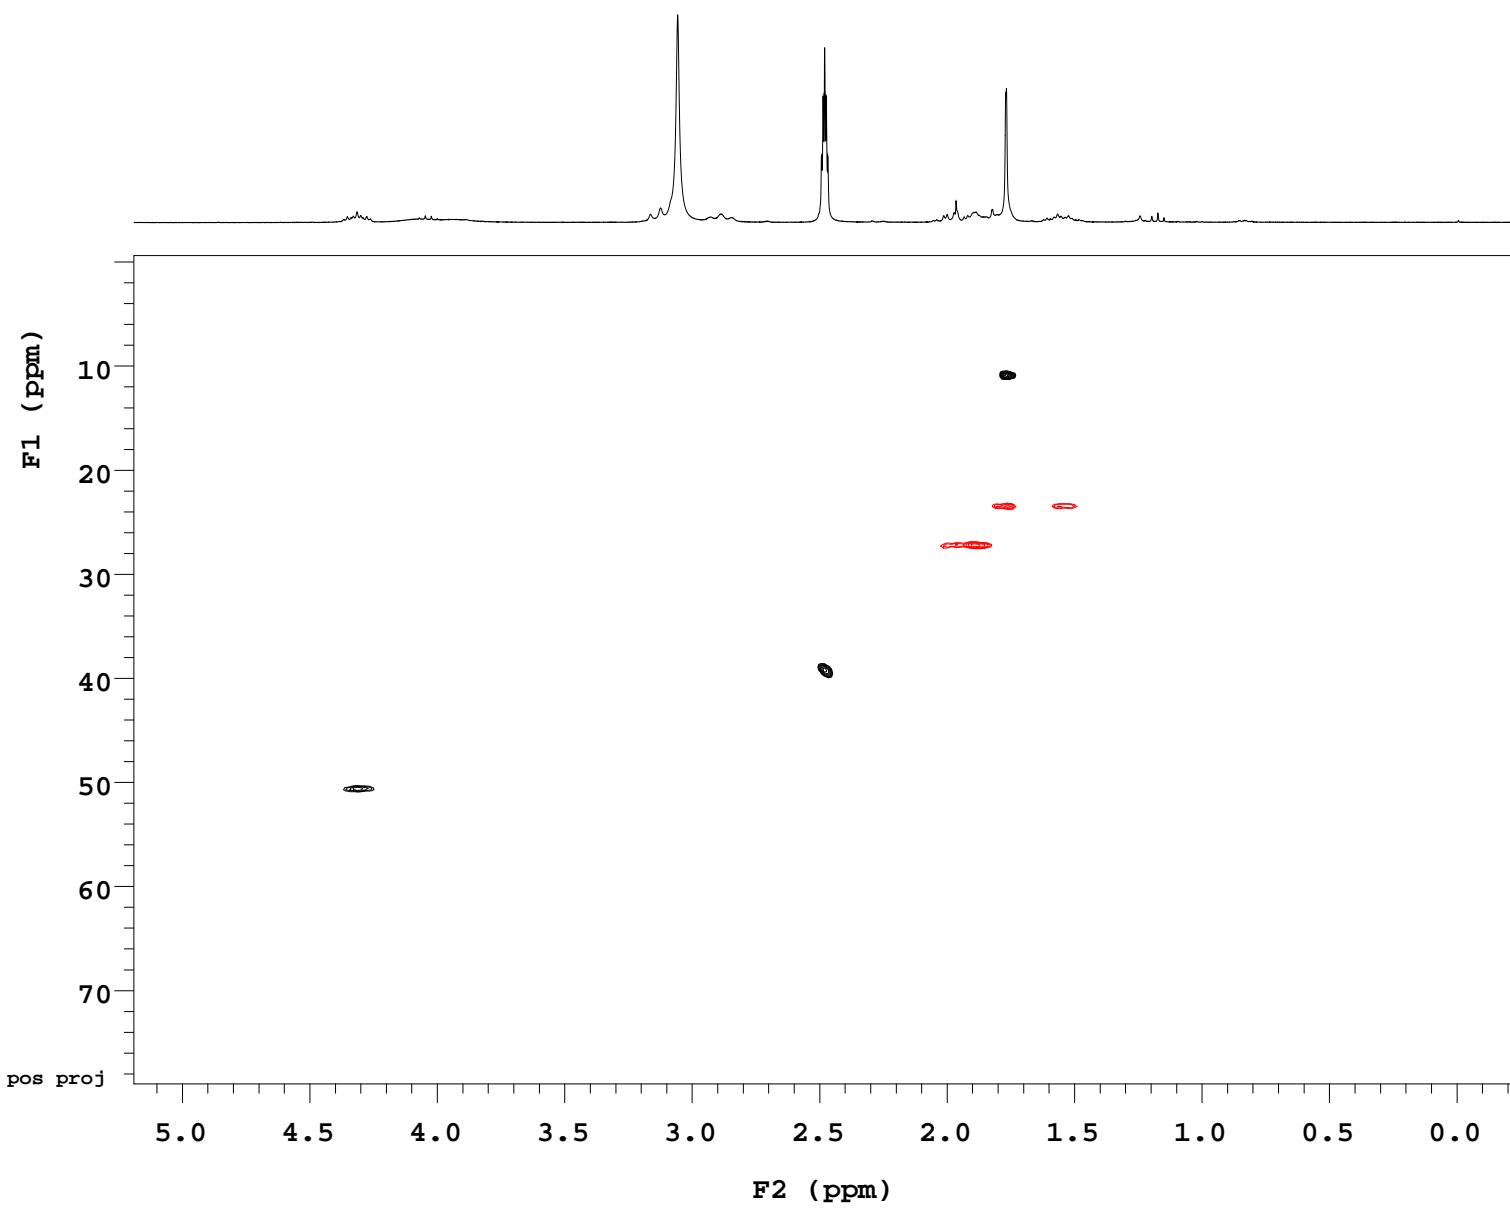

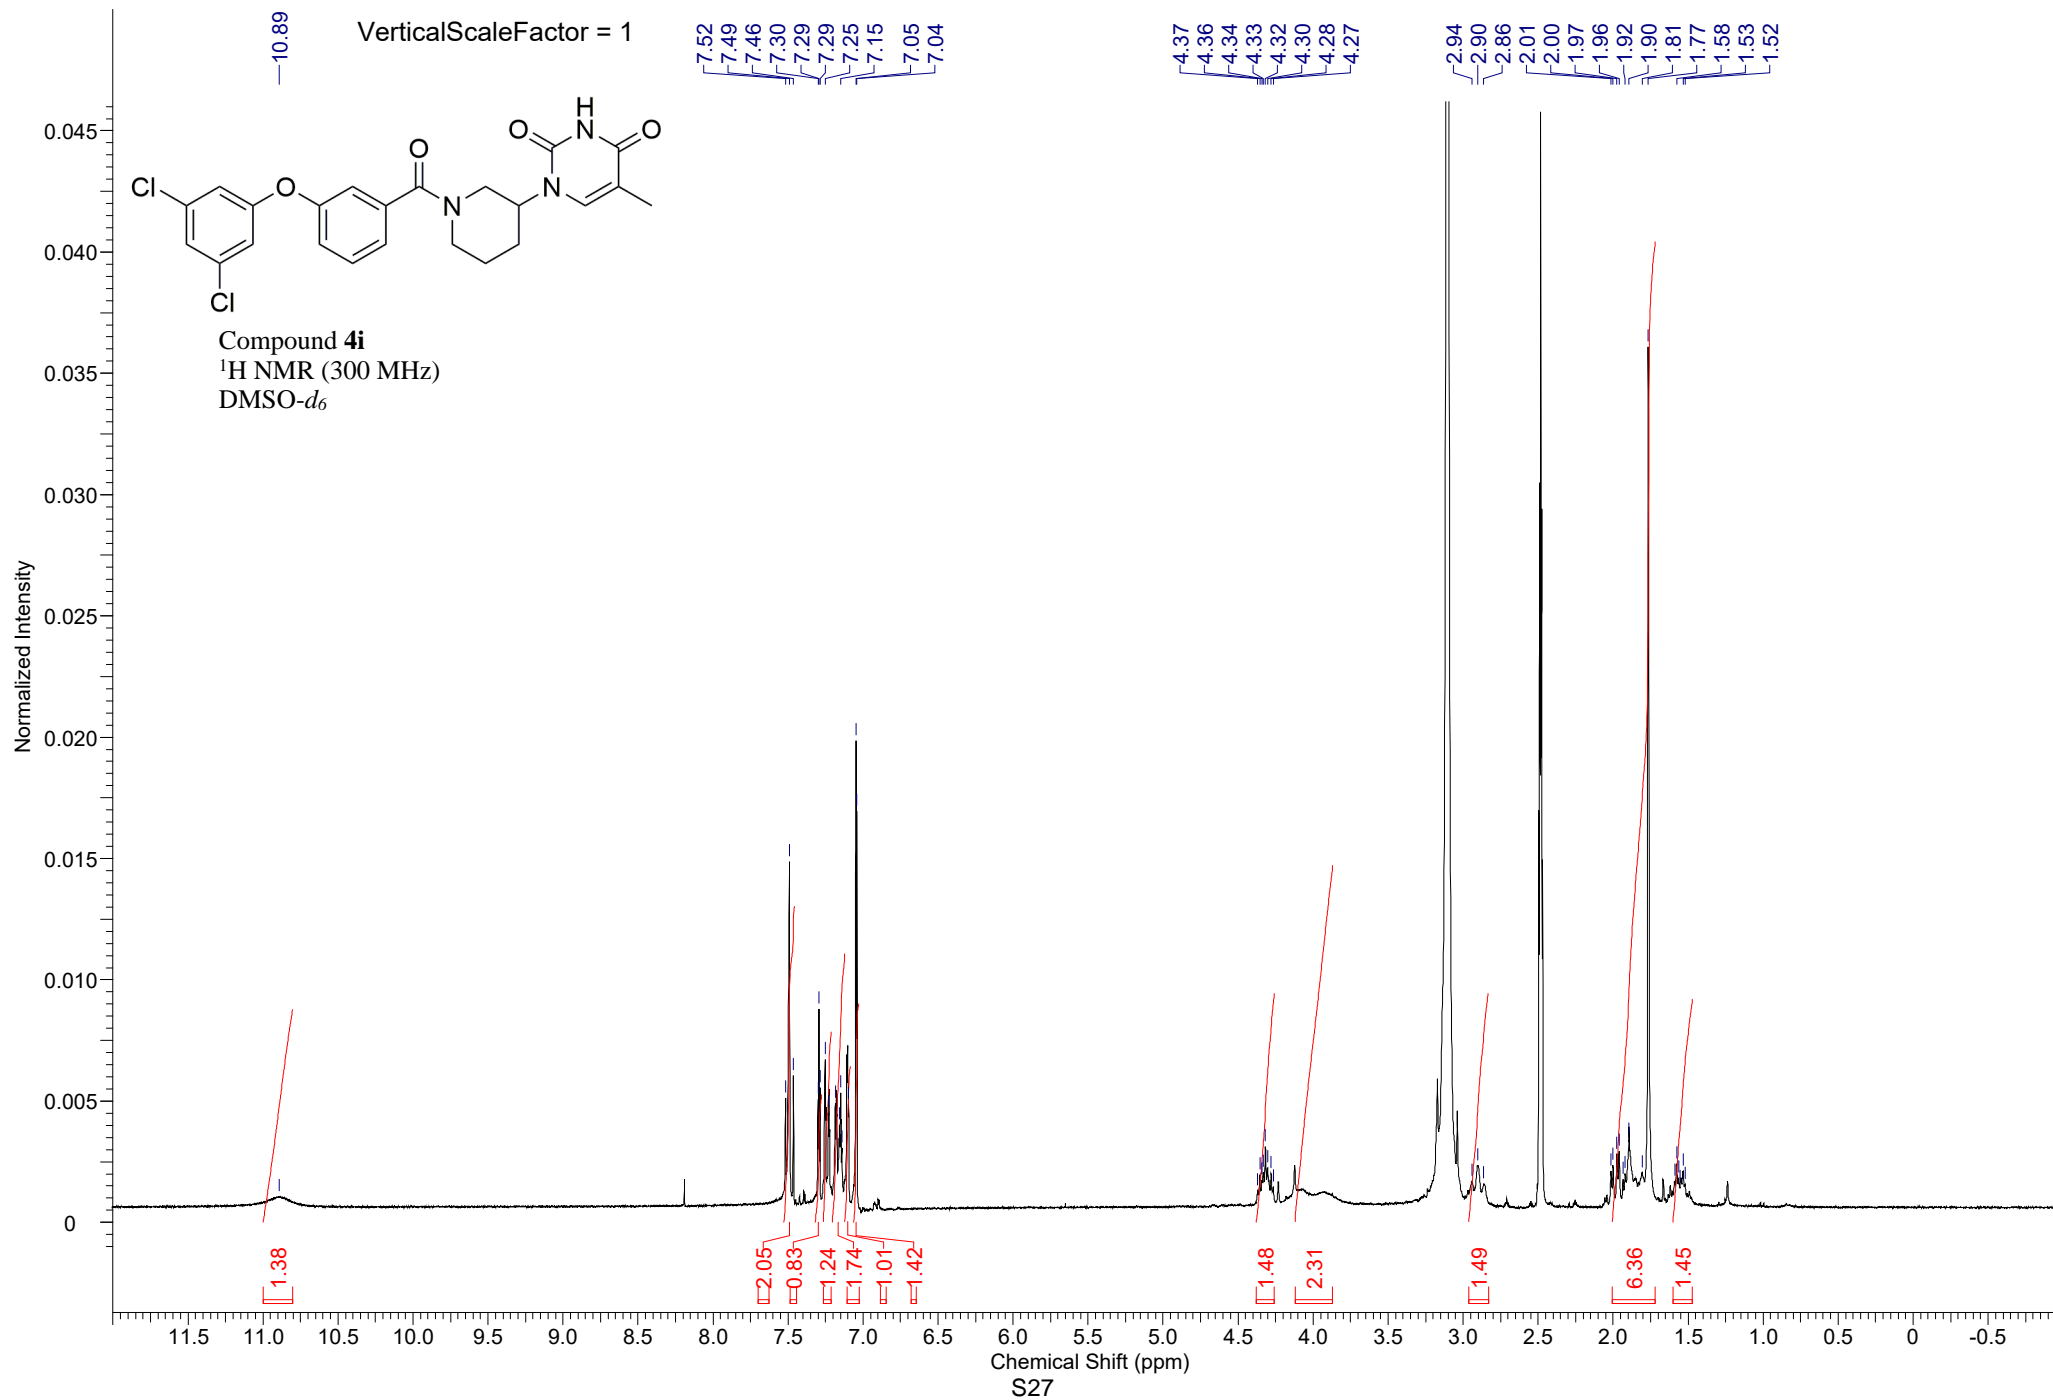

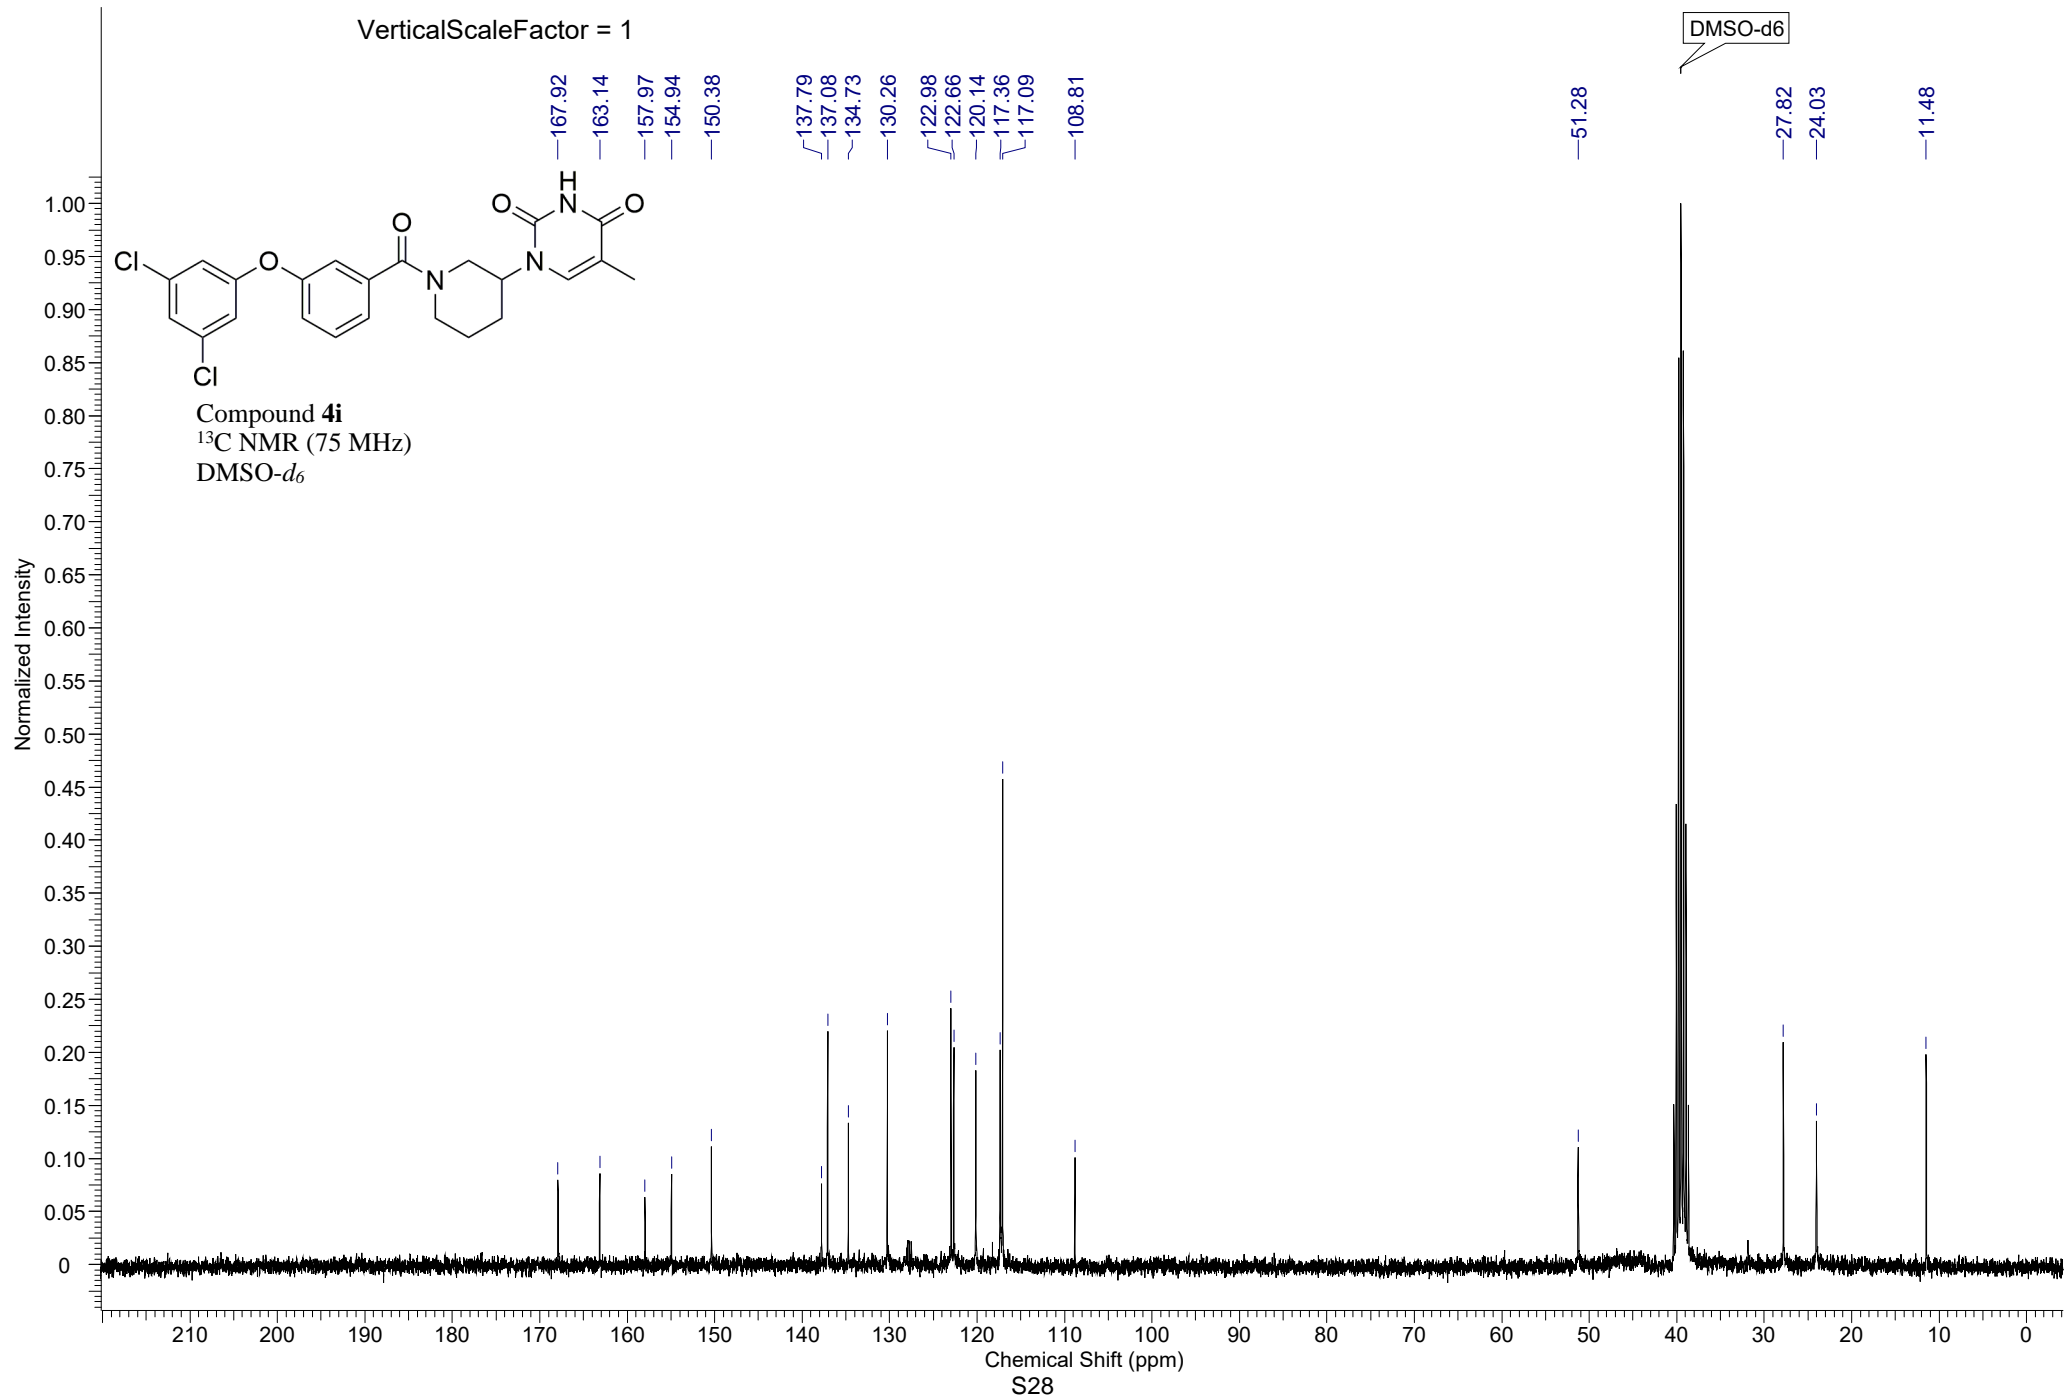

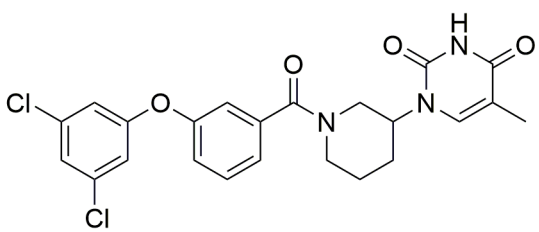

Compound **4i**  
HSQC  
DMSO-*d*<sub>6</sub>

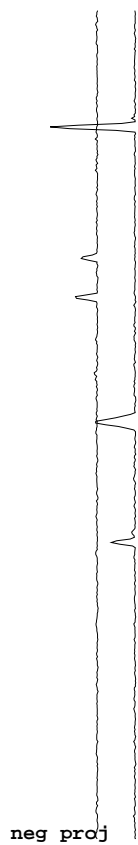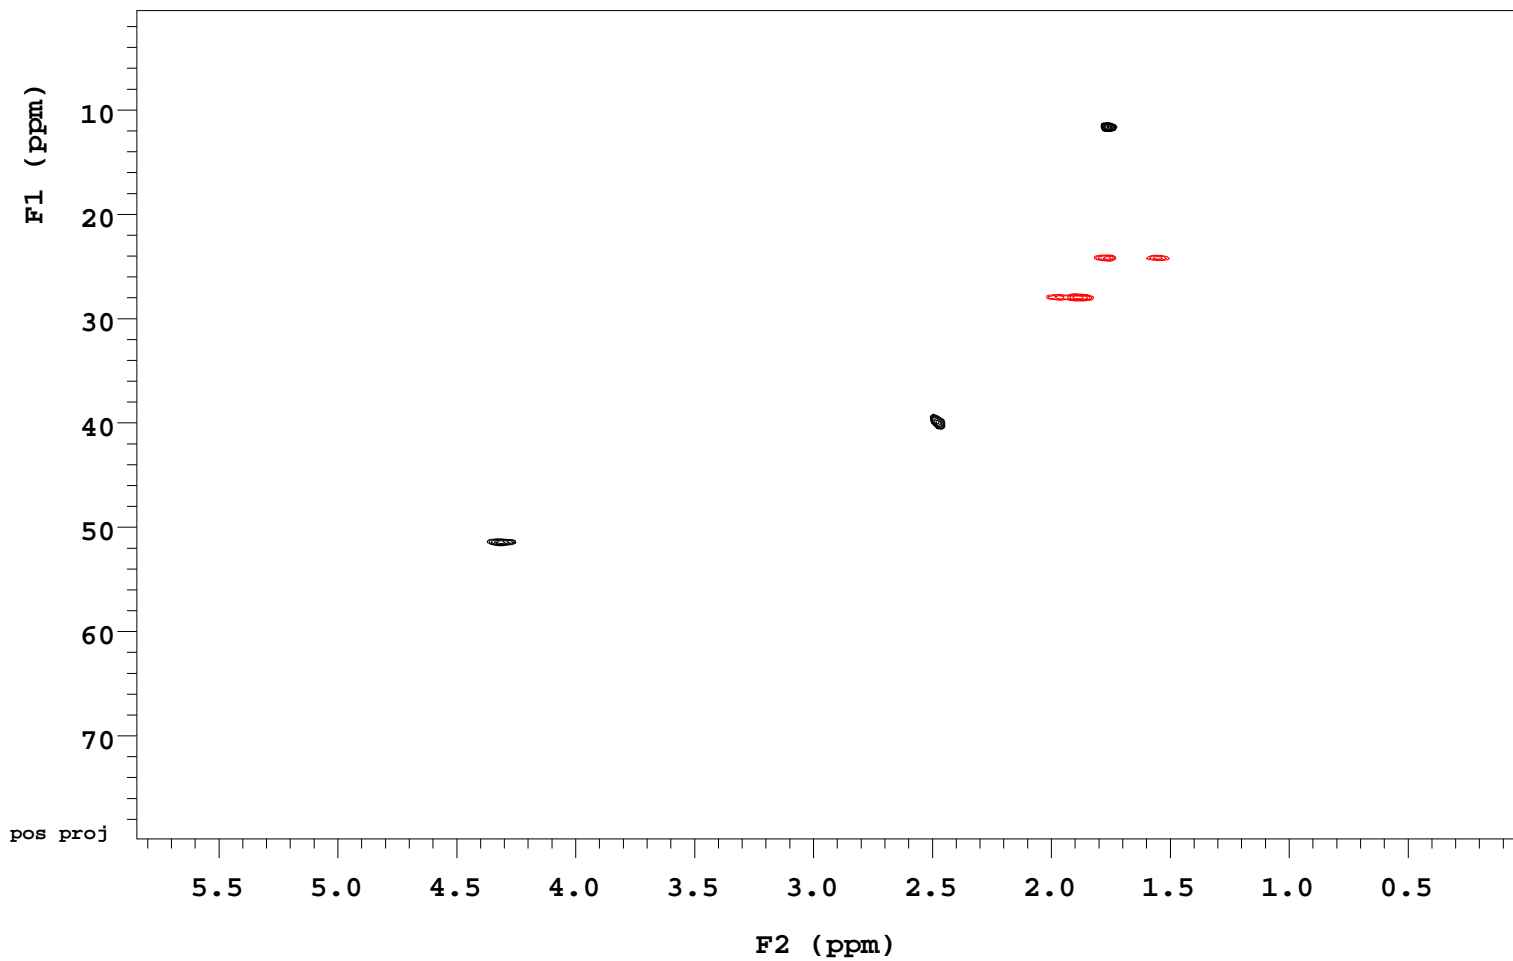

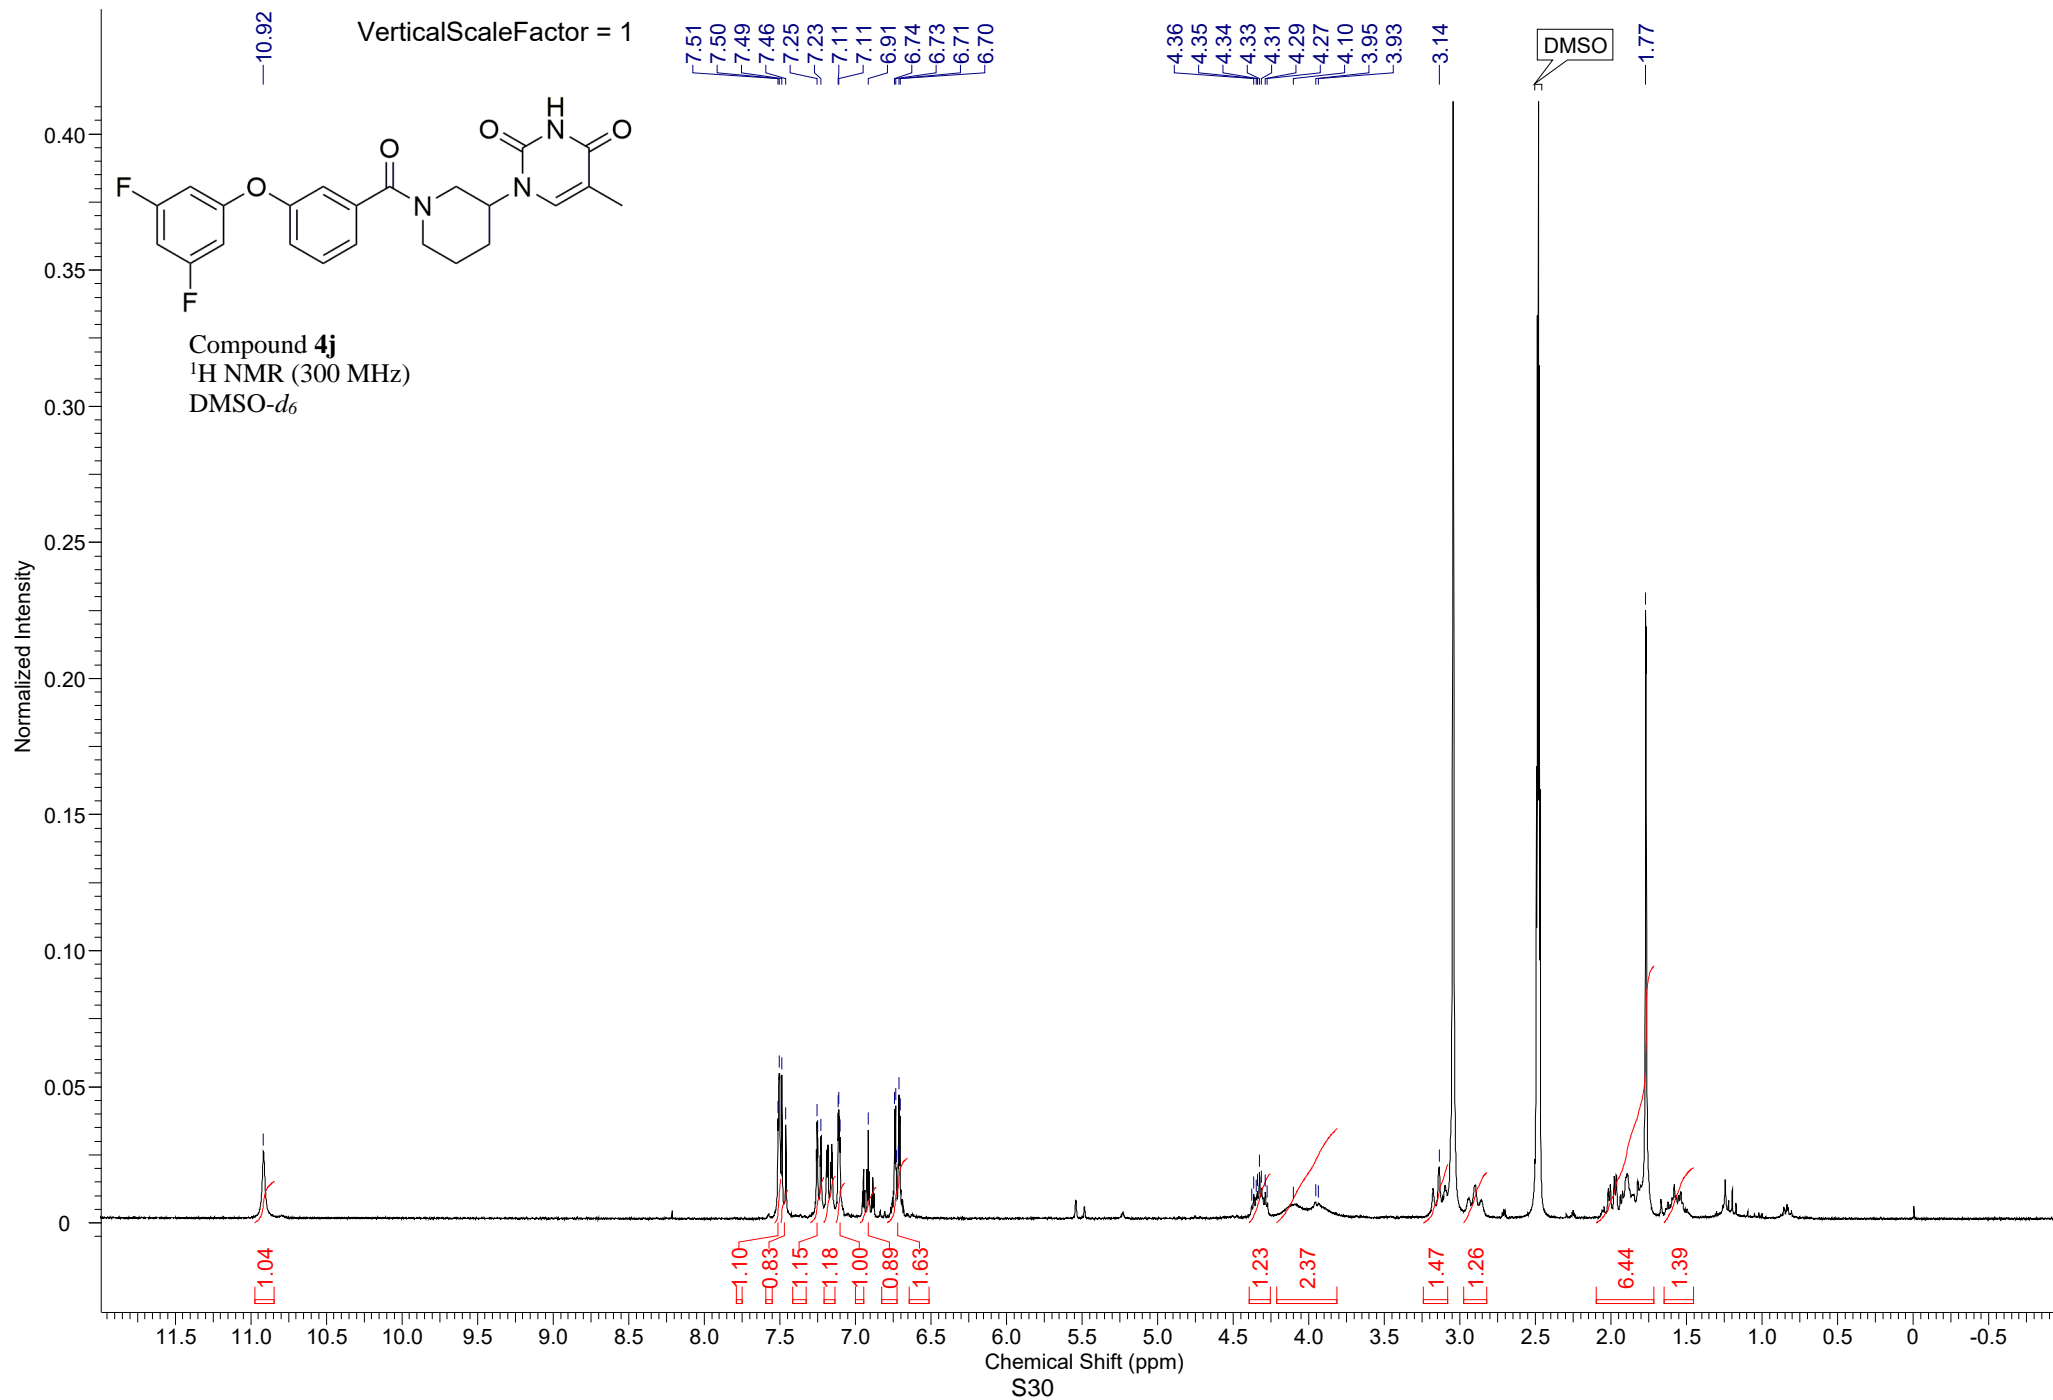

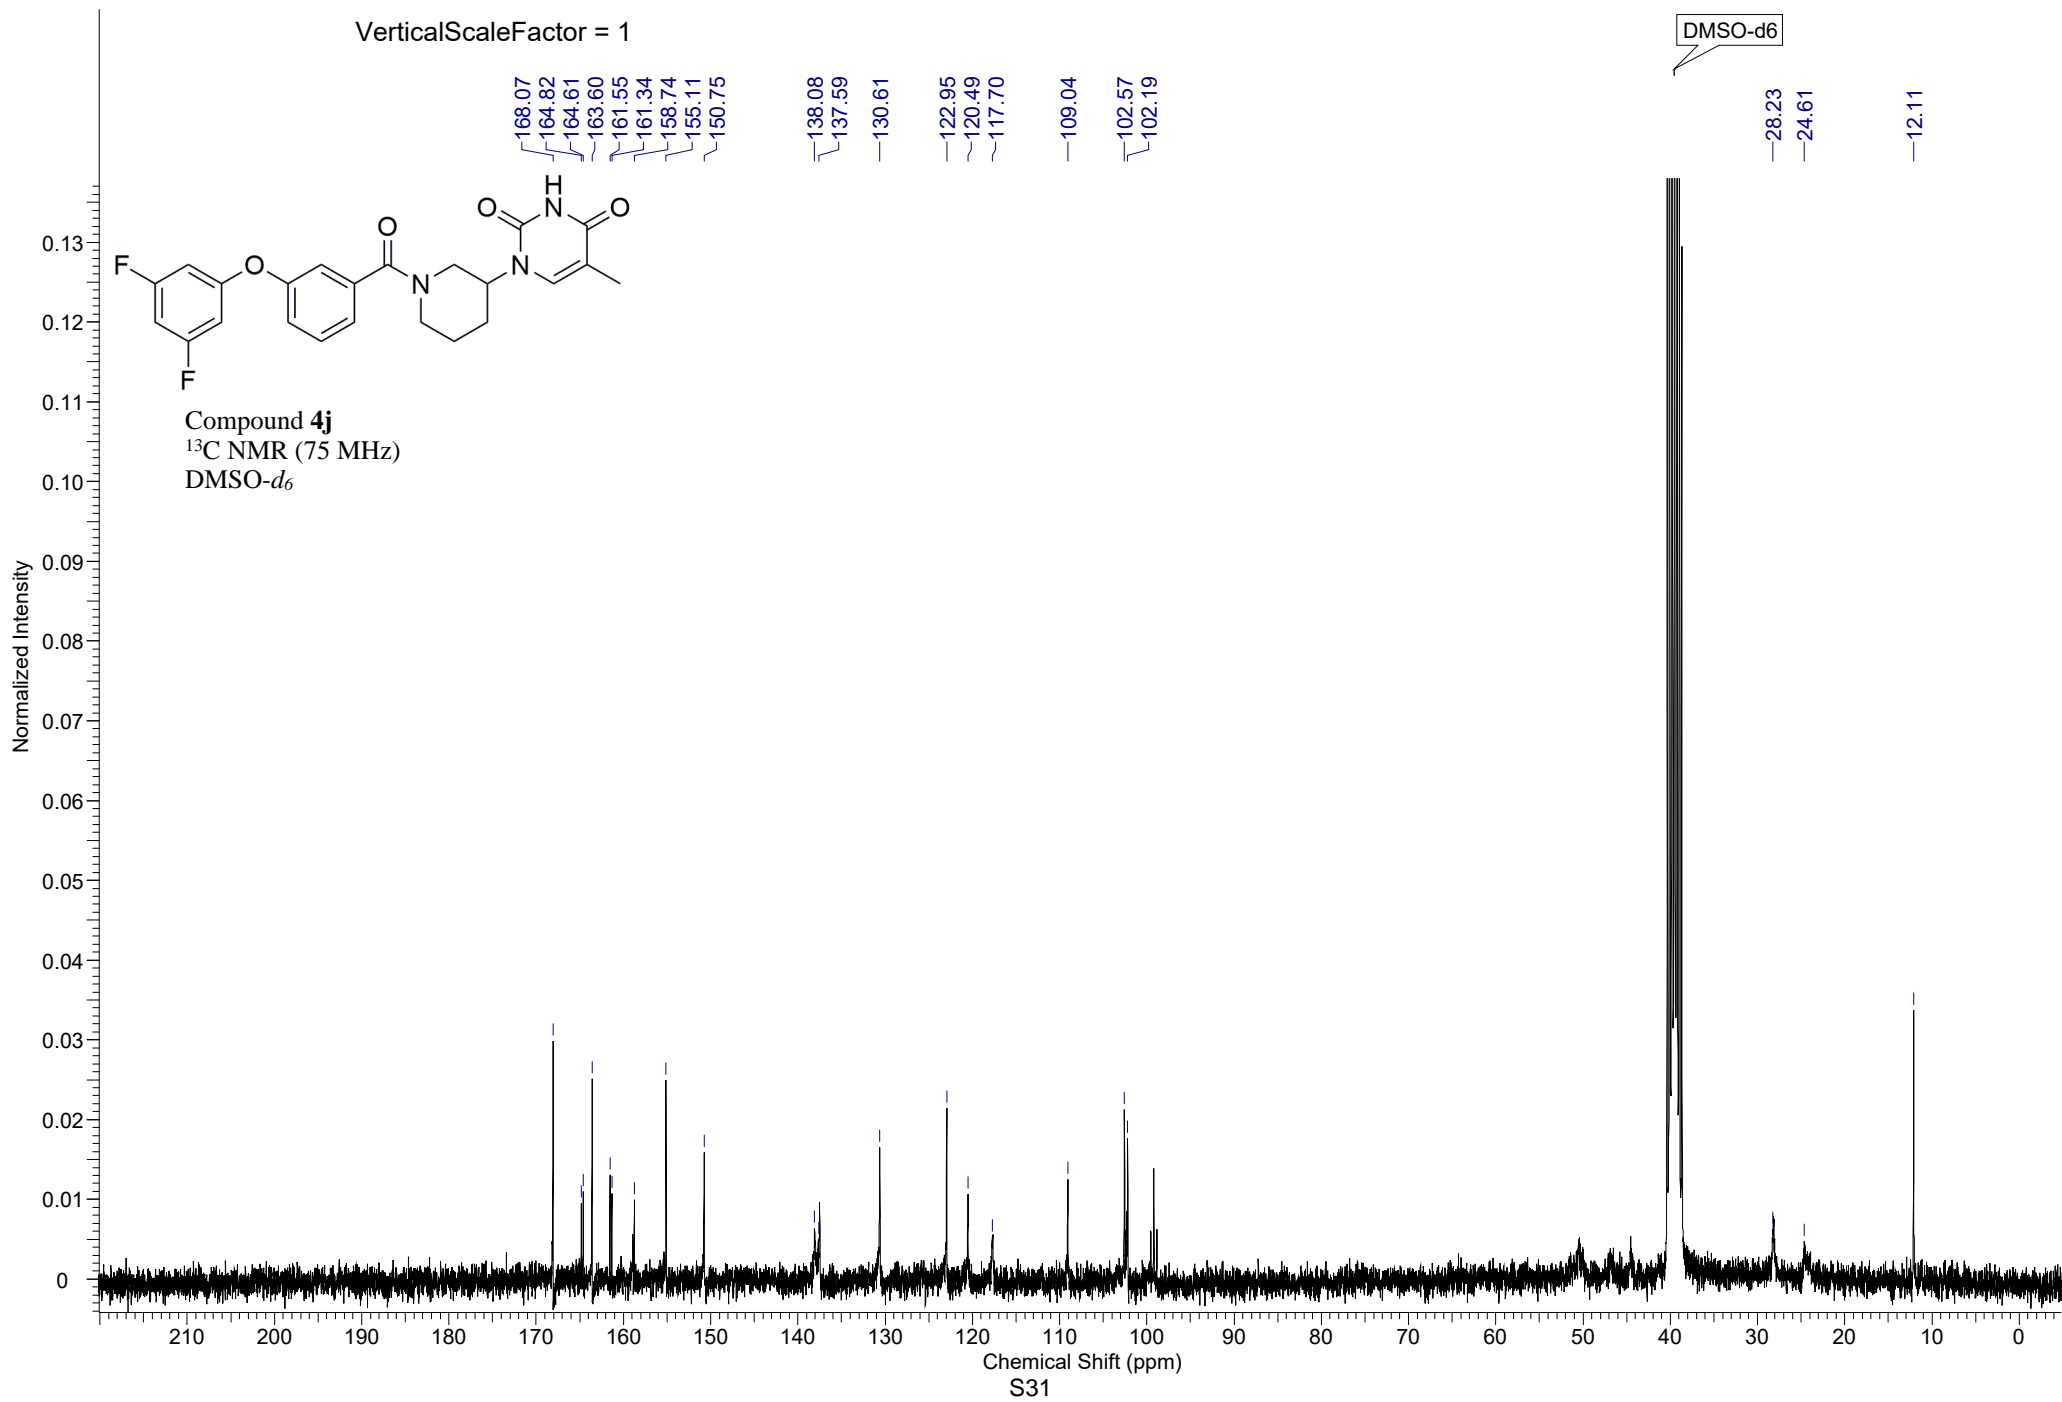

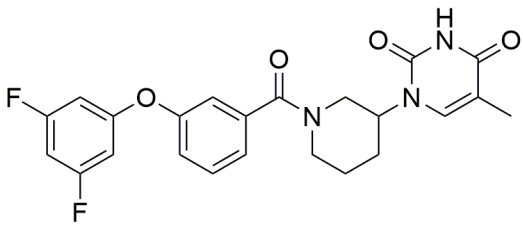

Compound **4j**  
HSQC  
DMSO-*d*<sub>6</sub>

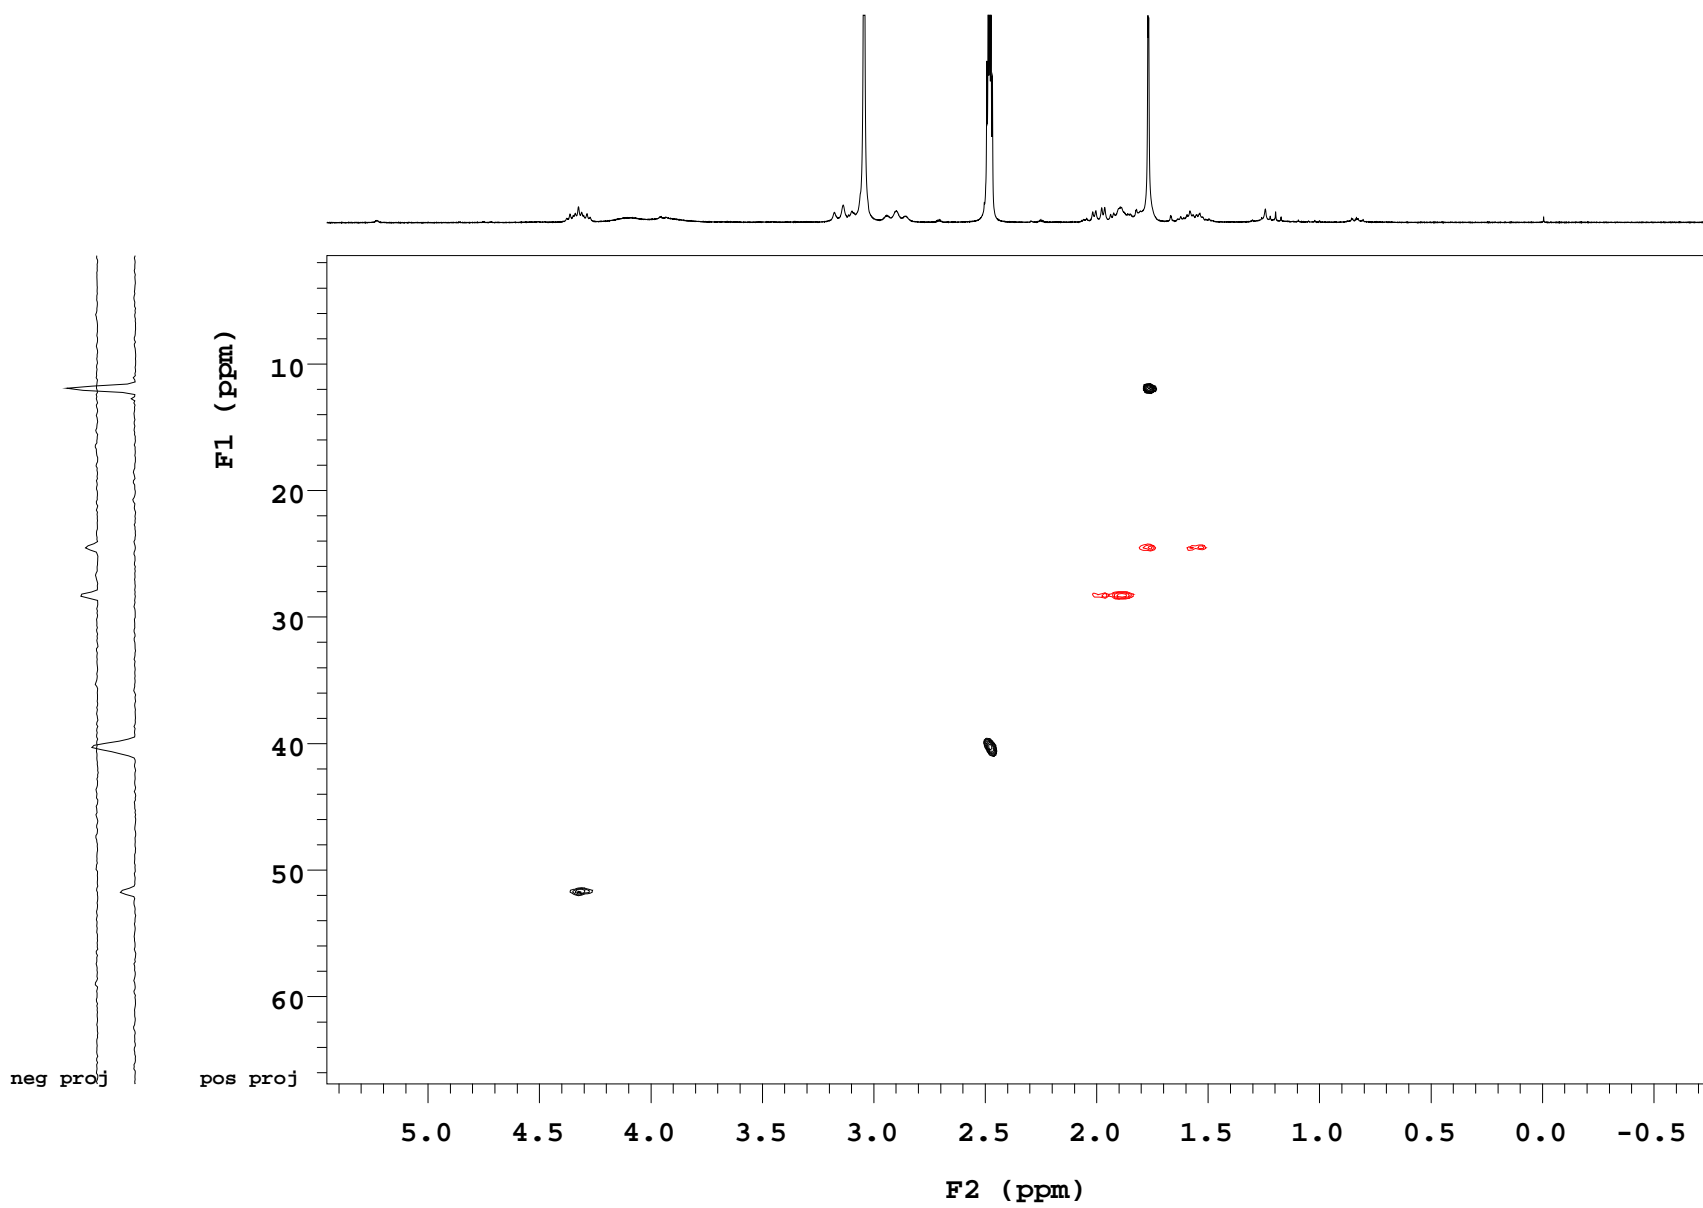



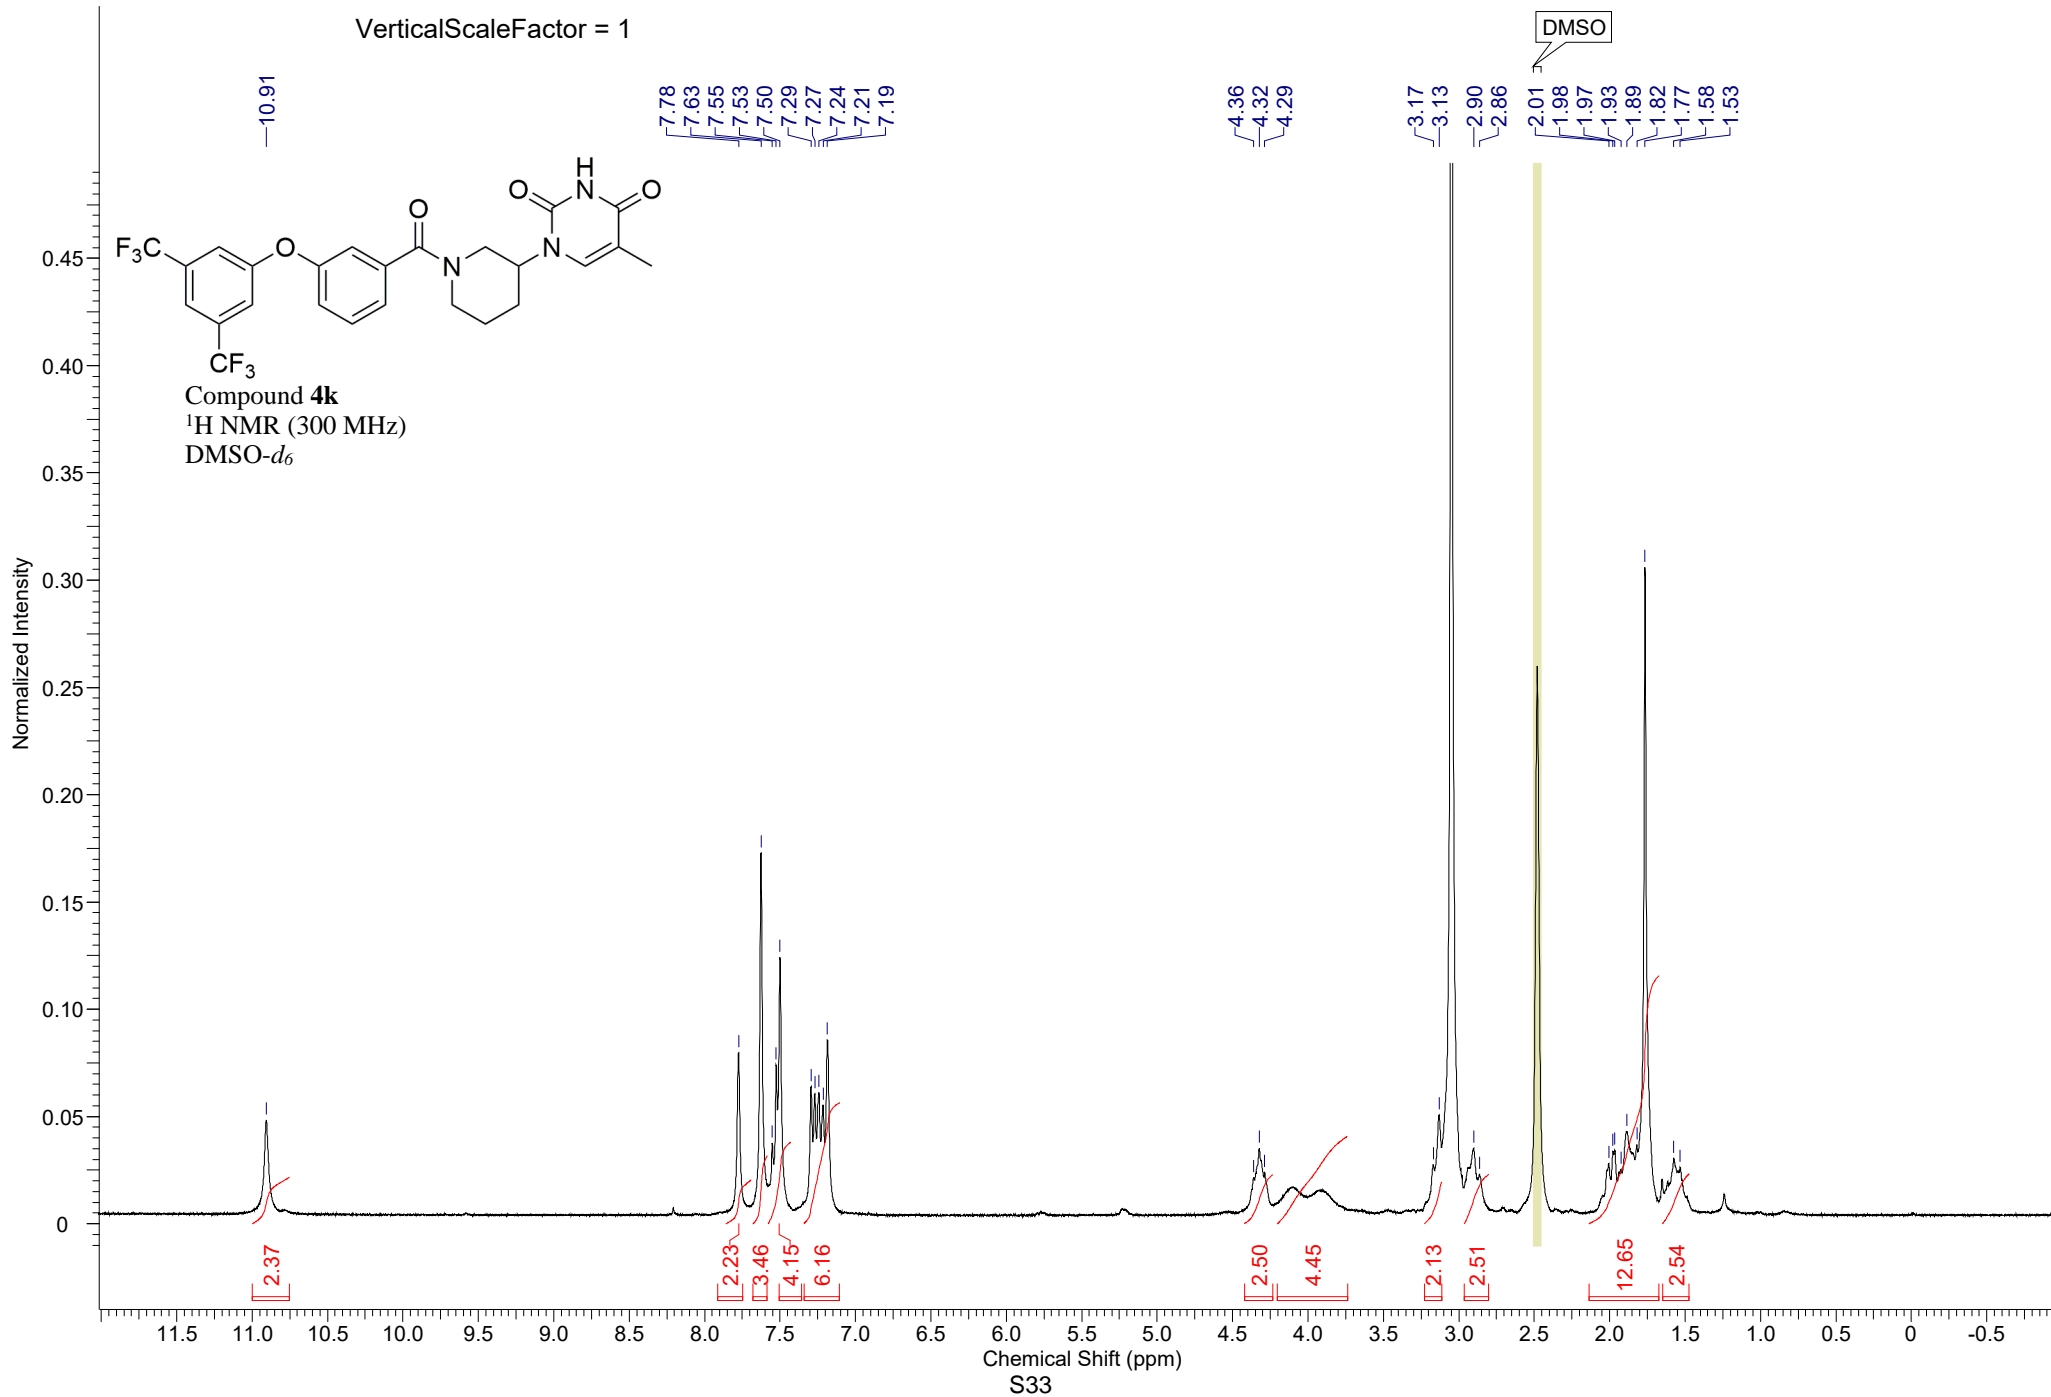

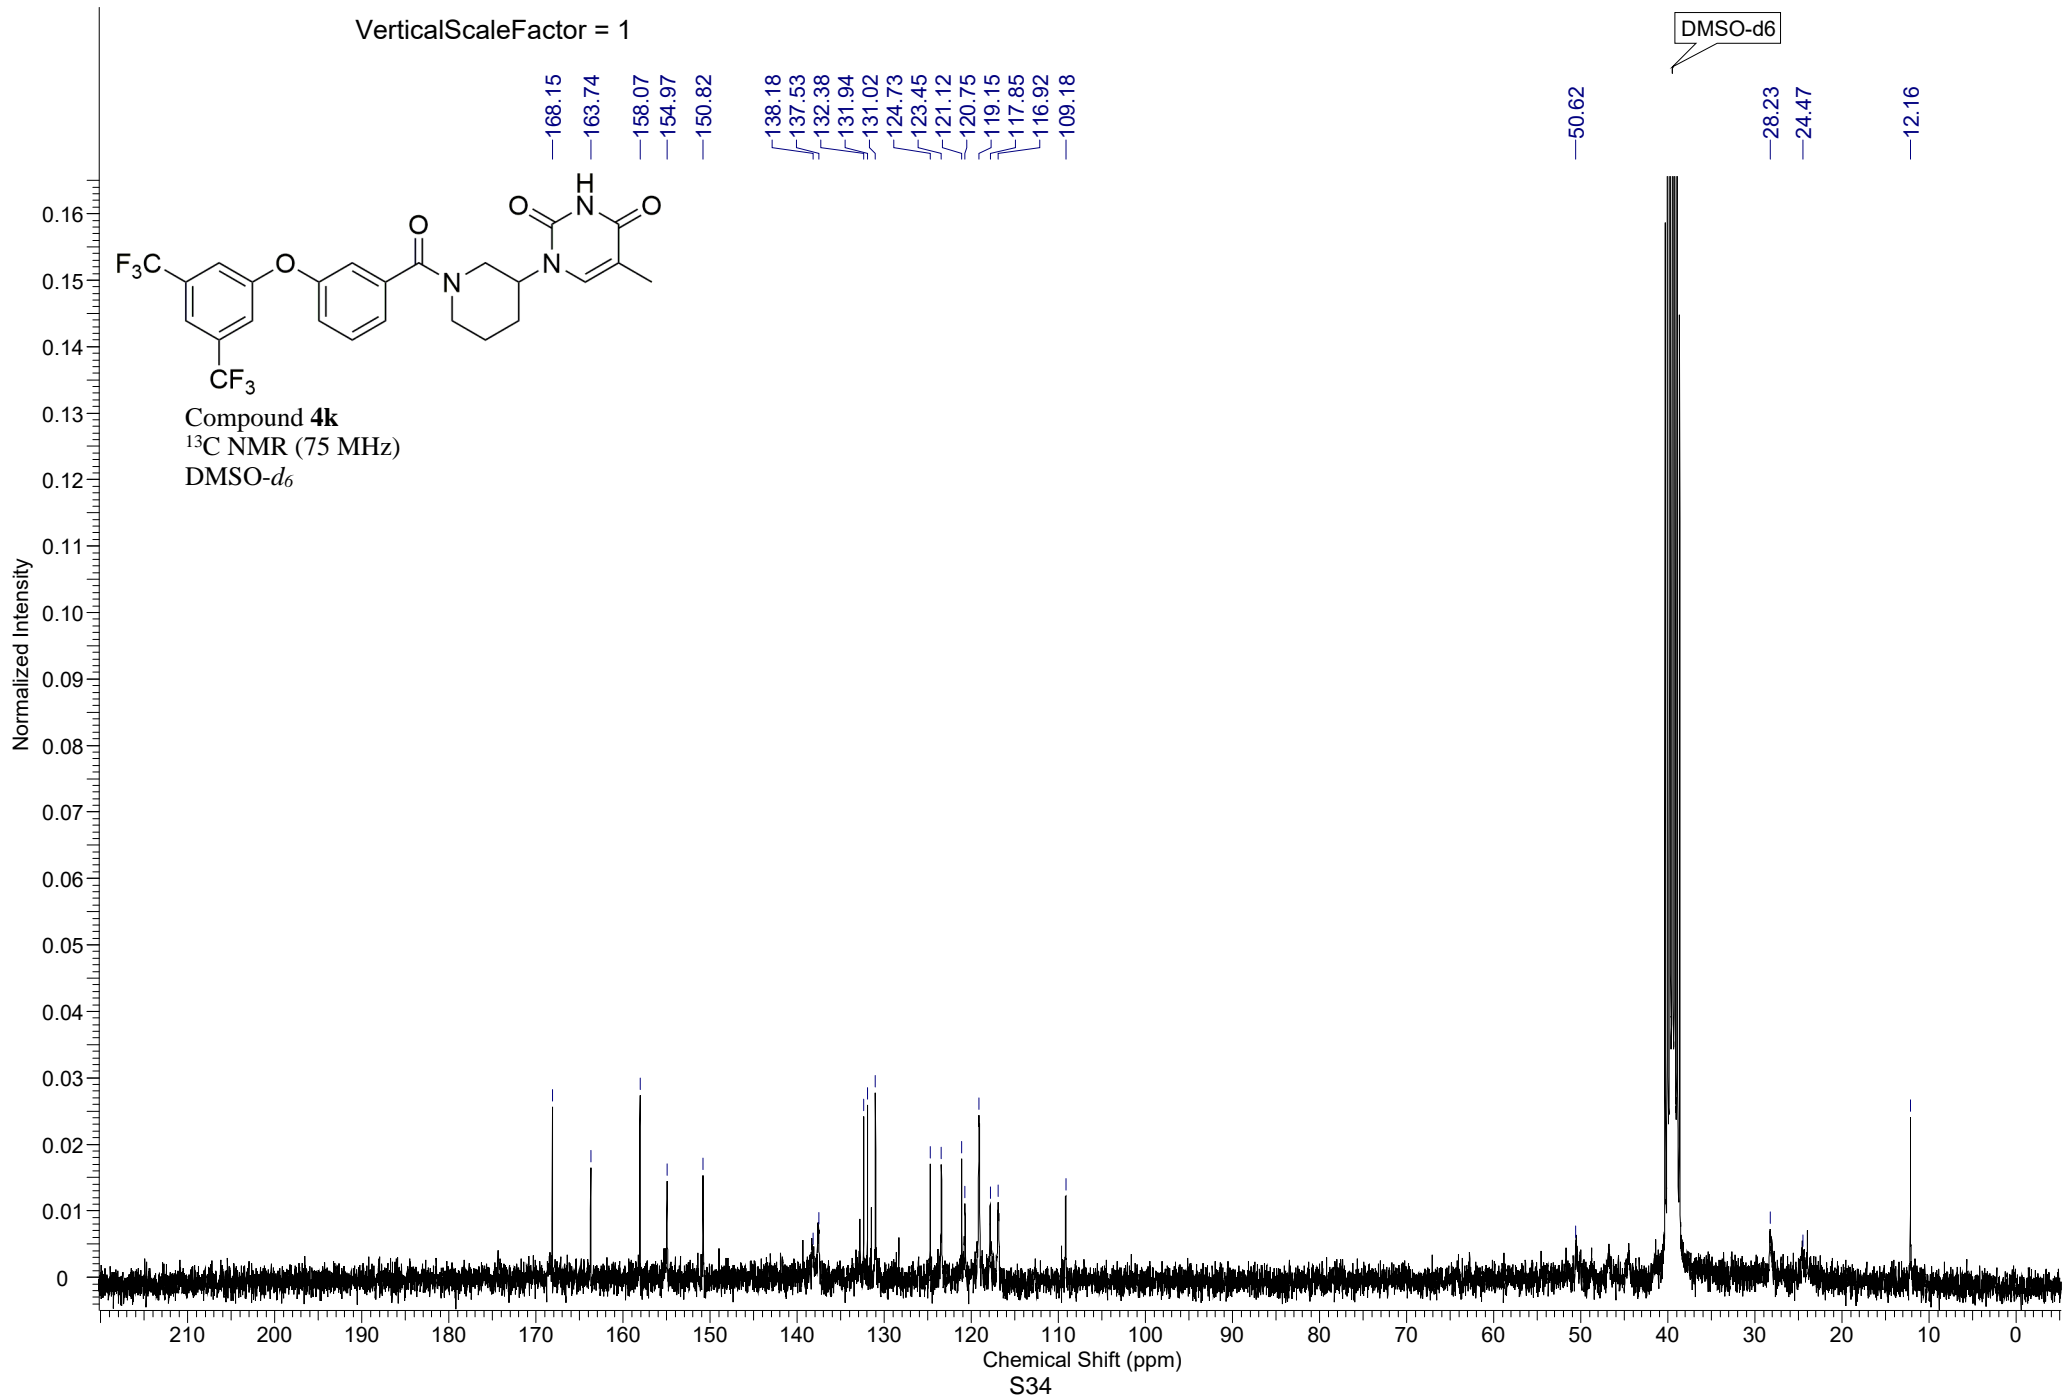

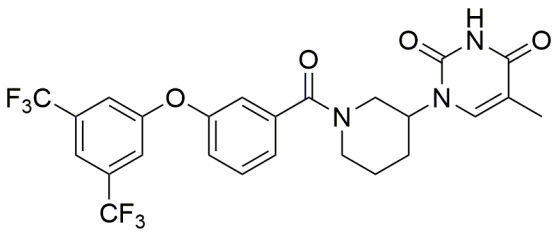

Compound 4h  
HSQC  
DMSO-*d*<sub>6</sub>

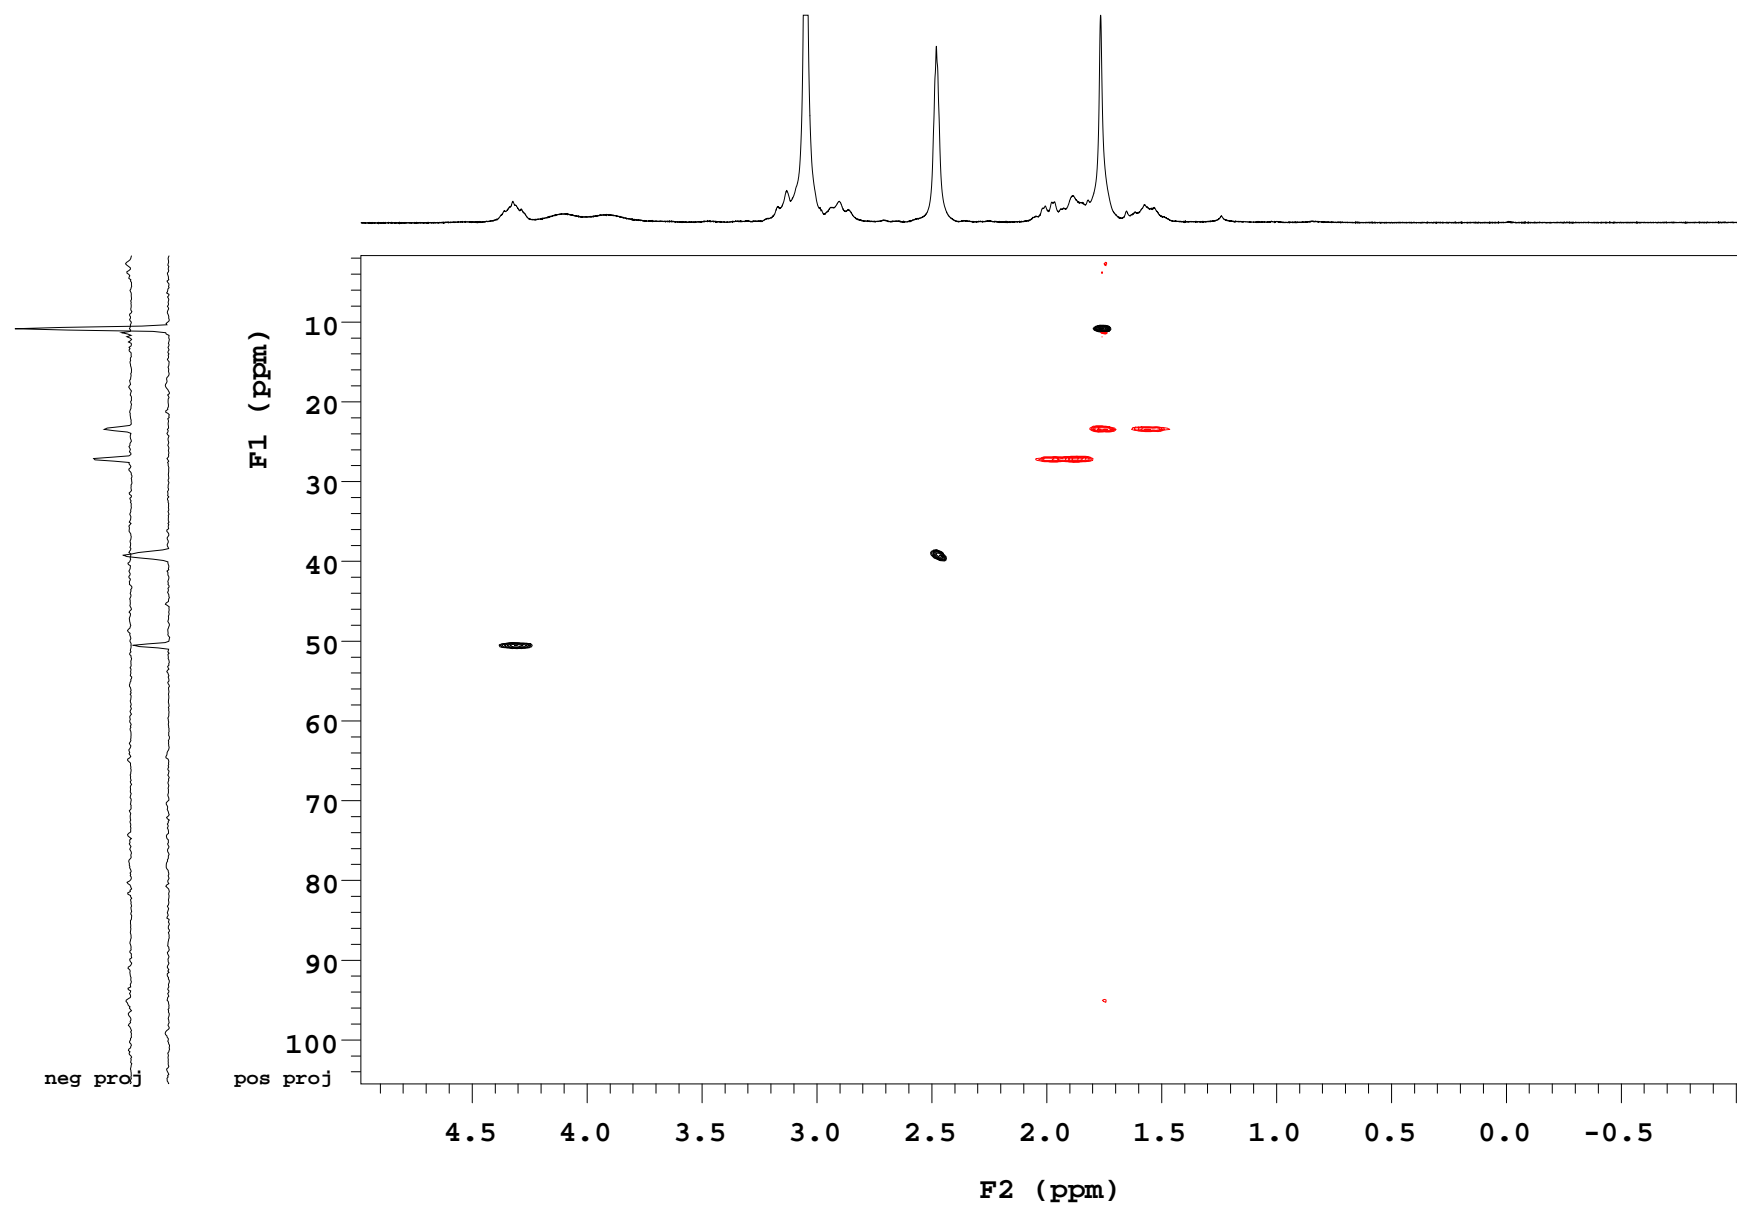

Supplement: IENZ_A_1662790_SM6762.pdf [file IENZ_A_1662790_SM6762.pdf]
